# Supplementary material for: Synthesis of acyloin natural products by Mukaiyama hydration
Source: Royal Society of Chemistry journal article supplement (doi:10.1039/d2ob00651k), 2022-01-01

# Synthesis of Acyloin Natural Products by Mukaiyama Hydration.

Michael Ricca, Wei Zhang, Jiaqi Li, Thomas Fellowes, Jonathan M. White, Paul S. Donnelly and  
Mark A. Rizzacasa\*

## Supporting Information

### Experimental Section

|                                                                     |        |
|---------------------------------------------------------------------|--------|
| Crystallographic Information                                        | S2     |
| Crystal Data for SALPNligand <b>13</b>                              | S2     |
| Crystal Data for Co <sup>II</sup> (SALPN)acac <b>14</b>             | S3     |
| Crystal Data for Co <sup>II</sup> (SALPN)H <sub>2</sub> O <b>15</b> | S4     |
| Crystal Data for soraphinol C diacetate ( <b>21</b> )               | S5     |
| References                                                          | S6     |
| <sup>1</sup> H and <sup>13</sup> C NMR spectra                      | S7-S49 |

### Crystallographic Information.

Intensity data for SALPN (**13**), Co<sup>III</sup> cat.A and Co<sup>II</sup> cat.B was collected on a Rigaku XtalLAB Synergy at 100.0(1) K. Data for (**25**) was collected on the MX1 beamline<sup>1</sup> at the Australian Synchrotron at 99.96(2) K. The temperature was maintained using an Oxford Cryostream cooling device. The structures were solved by direct methods and difference Fourier synthesis.<sup>2</sup> Thermal ellipsoid plots were integrated within the WINGX<sup>3</sup> suite of programs or Olex2<sup>4</sup>.

### Ortep of SALPN ligand 13.

Synthesised as previously described<sup>5</sup> and recrystallised from MeOH to give yellow blocks.

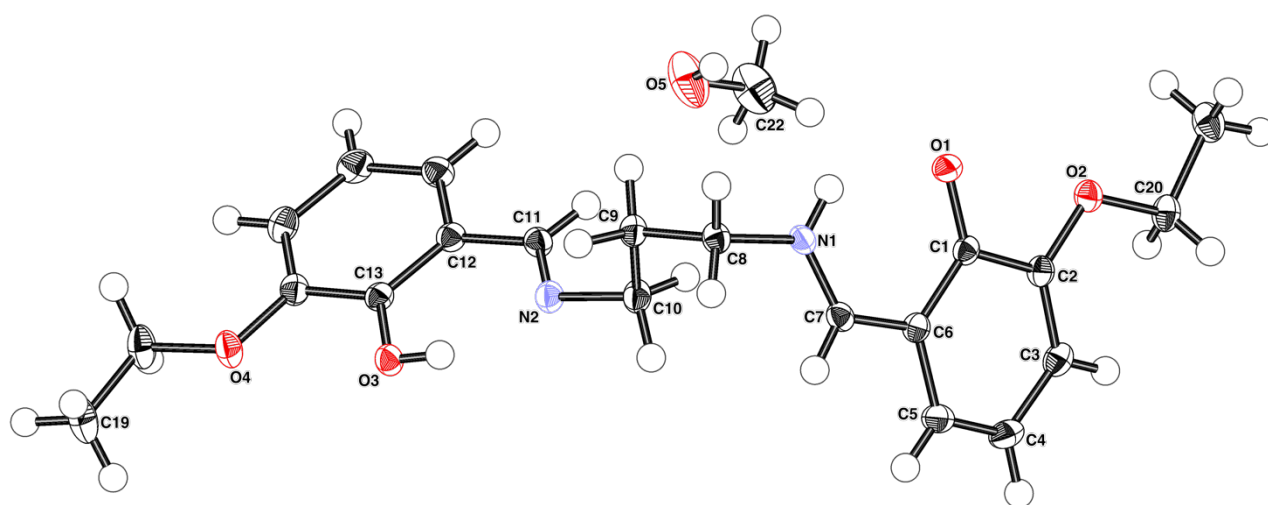

**Crystal Data for SALPN ligand 13:** C<sub>22</sub>H<sub>30</sub>N<sub>2</sub>O<sub>5</sub> (*M* = 402.48 g/mol): triclinic, space group P-1 (no. 2), *a* = 8.36320(10) Å, *b* = 10.77980(10) Å, *c* = 12.6342(2) Å,  $\alpha$  = 67.3400(10)°,  $\beta$  = 80.5230(10)°,  $\gamma$  = 88.5940(10)°, *V* = 1035.80(2) Å<sup>3</sup>, *Z* = 2, *T* = 100.00(10) K,  $\mu$ (Mo K $\alpha$ ) = 0.091 mm<sup>-1</sup>, *D*<sub>calc</sub> = 1.290 g/cm<sup>3</sup>, 61757 reflections measured (4.258° ≤ 2 $\theta$  ≤ 72.636°), 10019 unique (*R*<sub>int</sub> = 0.0368, *R*<sub>sigma</sub> = 0.0242) which were used in all calculations. The final *R*<sub>1</sub> was 0.0408 (*I* > 2 $\sigma$ (*I*)) and *wR*<sub>2</sub> was 0.1223 (all data).

## Ortep of Co<sup>III</sup>(SALPN)acac 14

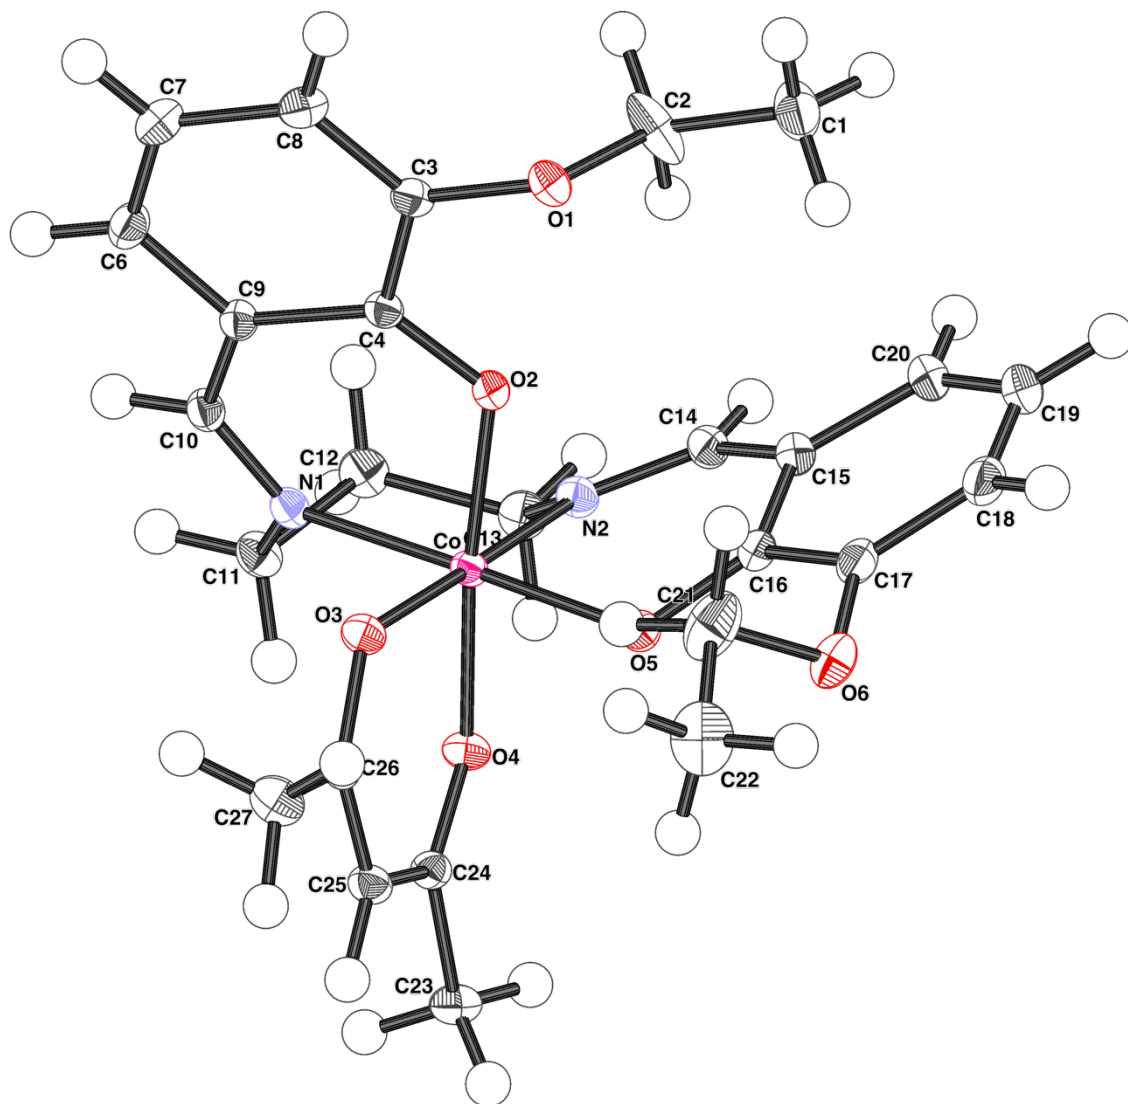

**Crystal Data for Co<sup>III</sup>(SALPN)acac 14** C<sub>26</sub>H<sub>31</sub>CoN<sub>2</sub>O<sub>6</sub> ( $M = 526.46$  g/mol): monoclinic, space group P2<sub>1</sub>/c (no. 14),  $a = 7.94650(10)$  Å,  $b = 26.3631(3)$  Å,  $c = 11.4522(2)$  Å,  $\beta = 92.6130(10)^\circ$ ,  $V = 2396.68(6)$  Å<sup>3</sup>,  $Z = 4$ ,  $T = 100.0(2)$  K,  $\mu(\text{Mo K}\alpha) = 0.761$  mm<sup>-1</sup>,  $D_{\text{calc}} = 1.459$  g/cm<sup>3</sup>, 176974 reflections measured ( $4.714^\circ \leq 2\theta \leq 115.818^\circ$ ), 33335 unique ( $R_{\text{int}} = 0.0839$ ,  $R_{\text{sigma}} = 0.0708$ ) which were used in all calculations. The final  $R_1$  was 0.0503 ( $I > 2\sigma(I)$ ) and  $wR_2$  was 0.1269 (all data).

**Ortep of Co<sup>II</sup>(SALPN)H<sub>2</sub>O (15).**

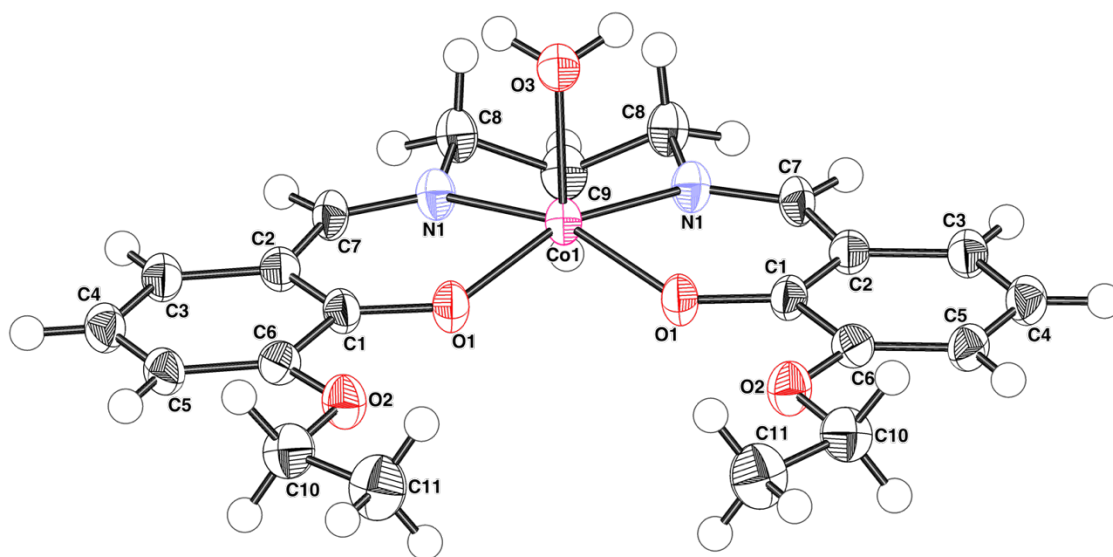

**Ortep of CoII(SALPN)H<sub>2</sub>O (15) showing close contacts.**

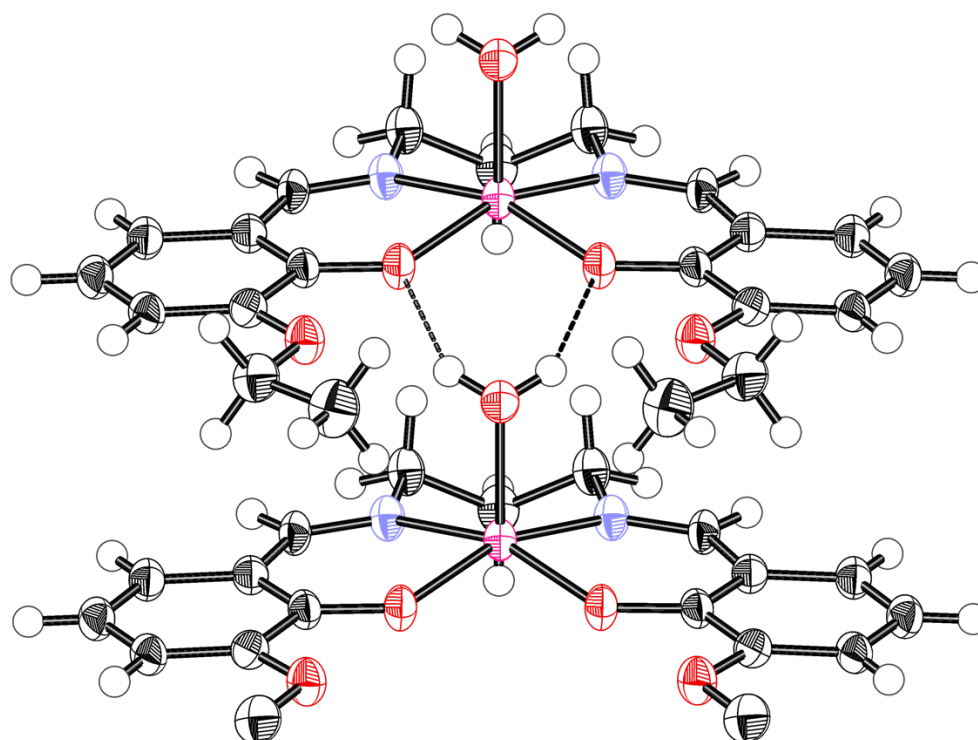

**Crystal Data for CoII(SALPN)H<sub>2</sub>O 15:** C<sub>21</sub>H<sub>26</sub>N<sub>2</sub>O<sub>5</sub>Co (*M* = 445.37 g/mol): tetragonal, space group P-42<sub>1</sub>m (no. 113), *a* = 20.4662(3) Å, *c* = 5.03150(10) Å, *V* = 2107.52(7) Å<sup>3</sup>, *Z* = 4, *T* = 100.0(1) K,  $\mu(\text{Cu K}\alpha) = 6.675 \text{ mm}^{-1}$ , *D*<sub>calc</sub> = 1.404 g/cm<sup>3</sup>, 10846 reflections measured ( $6.108^\circ \leq 2\theta \leq 154.226^\circ$ ), 2264 unique (*R*<sub>int</sub> = 0.0623, *R*<sub>sigma</sub> = 0.0449) which were used in all calculations. The final *R*<sub>1</sub> was 0.0393 (*I* > 2σ(*I*)) and *wR*<sub>2</sub> was 0.1077 (all data).

**ORTEP of soraphinol C diacetate (21).**

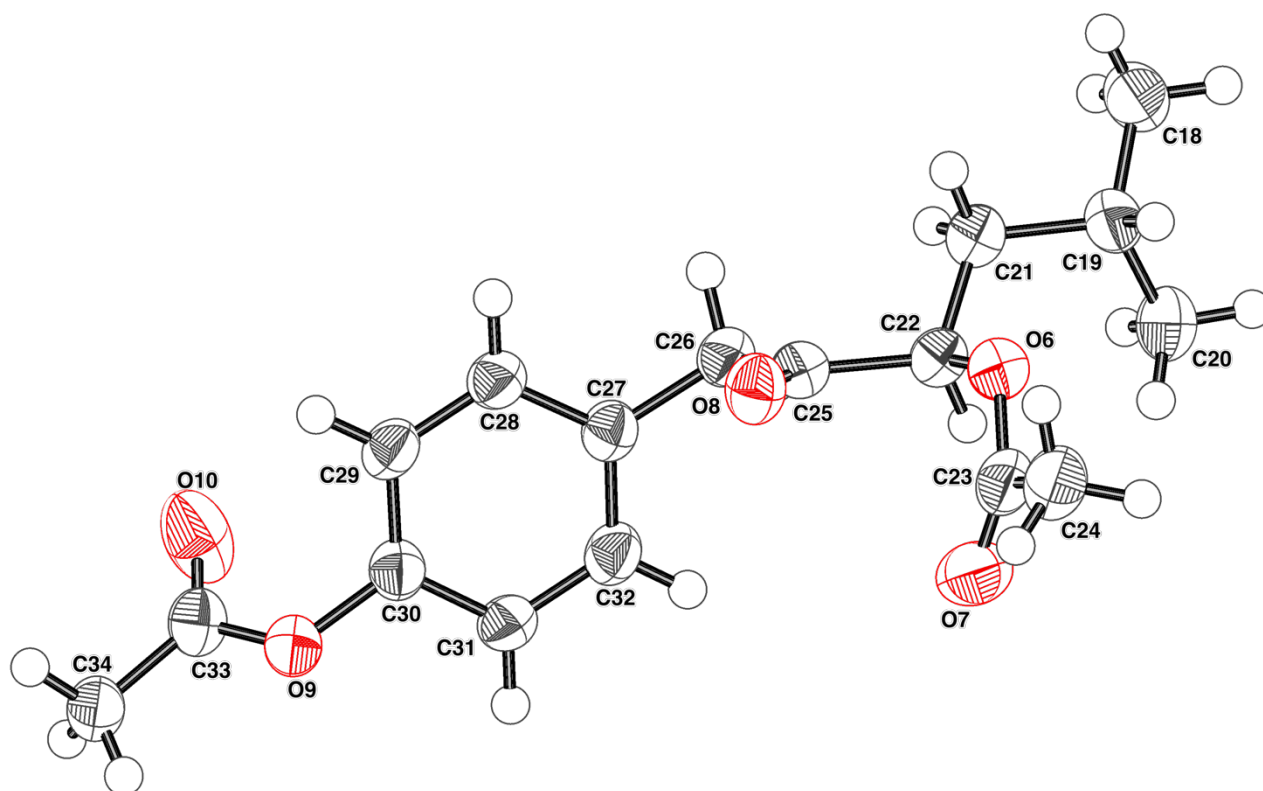

**Crystal Data for soraphinol C diacetate (21)**  $C_{17}H_{22}O_5$  ( $M = 306.34$  g/mol): triclinic, space group P-1 (no. 2),  $a = 8.78440(10)$  Å,  $b = 10.21930(10)$  Å,  $c = 18.8935(2)$  Å,  $\alpha = 75.4950(10)^\circ$ ,  $\beta = 84.8940(10)^\circ$ ,  $\gamma = 88.4970(10)^\circ$ ,  $V = 1635.49(3)$  Å<sup>3</sup>,  $Z = 4$ ,  $T = 99.96(2)$  K,  $\mu(\text{Synchrotron}) = 0.091$  mm<sup>-1</sup>,  $D_{\text{calc}} = 1.244$  g/cm<sup>3</sup>, 21093 reflections measured ( $2.234^\circ \leq 2\theta \leq 58.35^\circ$ ), 6141 unique ( $R_{\text{int}} = 0.0514$ ,  $R_{\text{sigma}} = 0.0492$ ) which were used in all calculations. The final  $R_1$  was 0.0673 ( $I > 2\sigma(I)$ ) and  $wR_2$  was 0.2120 (all data).

## References

1. Cowieson, N.P.; Aragao, D.; Clift, M.; Ericsson, D.J.; Gee, C.; Harrop, S.J.; Mudie, N.; Panjikar, S.; Price, J.R.; Riboldi-Tunncliffe, A.; Williamson, R.; Caradoc-Davies, T. *J. Synchrotron Radiation*, **2015**, *22*, 187-190.
2. Sheldrick, G. *Acta Crystallogr. Section C*, **2015**, *71*, 3-8.
3. Farrugia, L. J.; *J. Appl. Cryst.* **1999**, *32*, 837-838.
4. Dolomanov, O.V.; Bourhis, L.J.; Gildea, R.J.; Howard, J.A.K.; Puschmann, H. *J. Appl. Cryst.* **2009** *42*, 339-341.
5. Donnelly, P. S.; North, A. J.; Radjah, N. C.; Ricca, M.; Robertson, A.; White, J. M.; Rizzacasa, M. A. *Chem. Commun.* **2019**, 7699–7702.

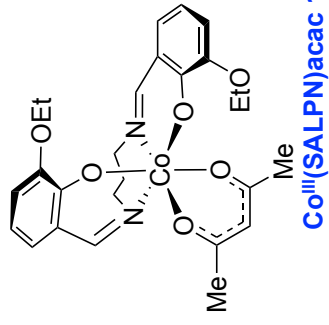

<sup>1</sup>H NMR spectrum (CDCl<sub>3</sub>, 500 MHz)

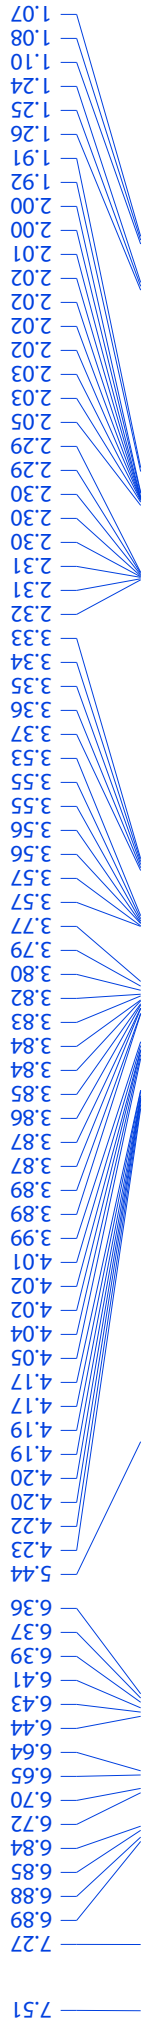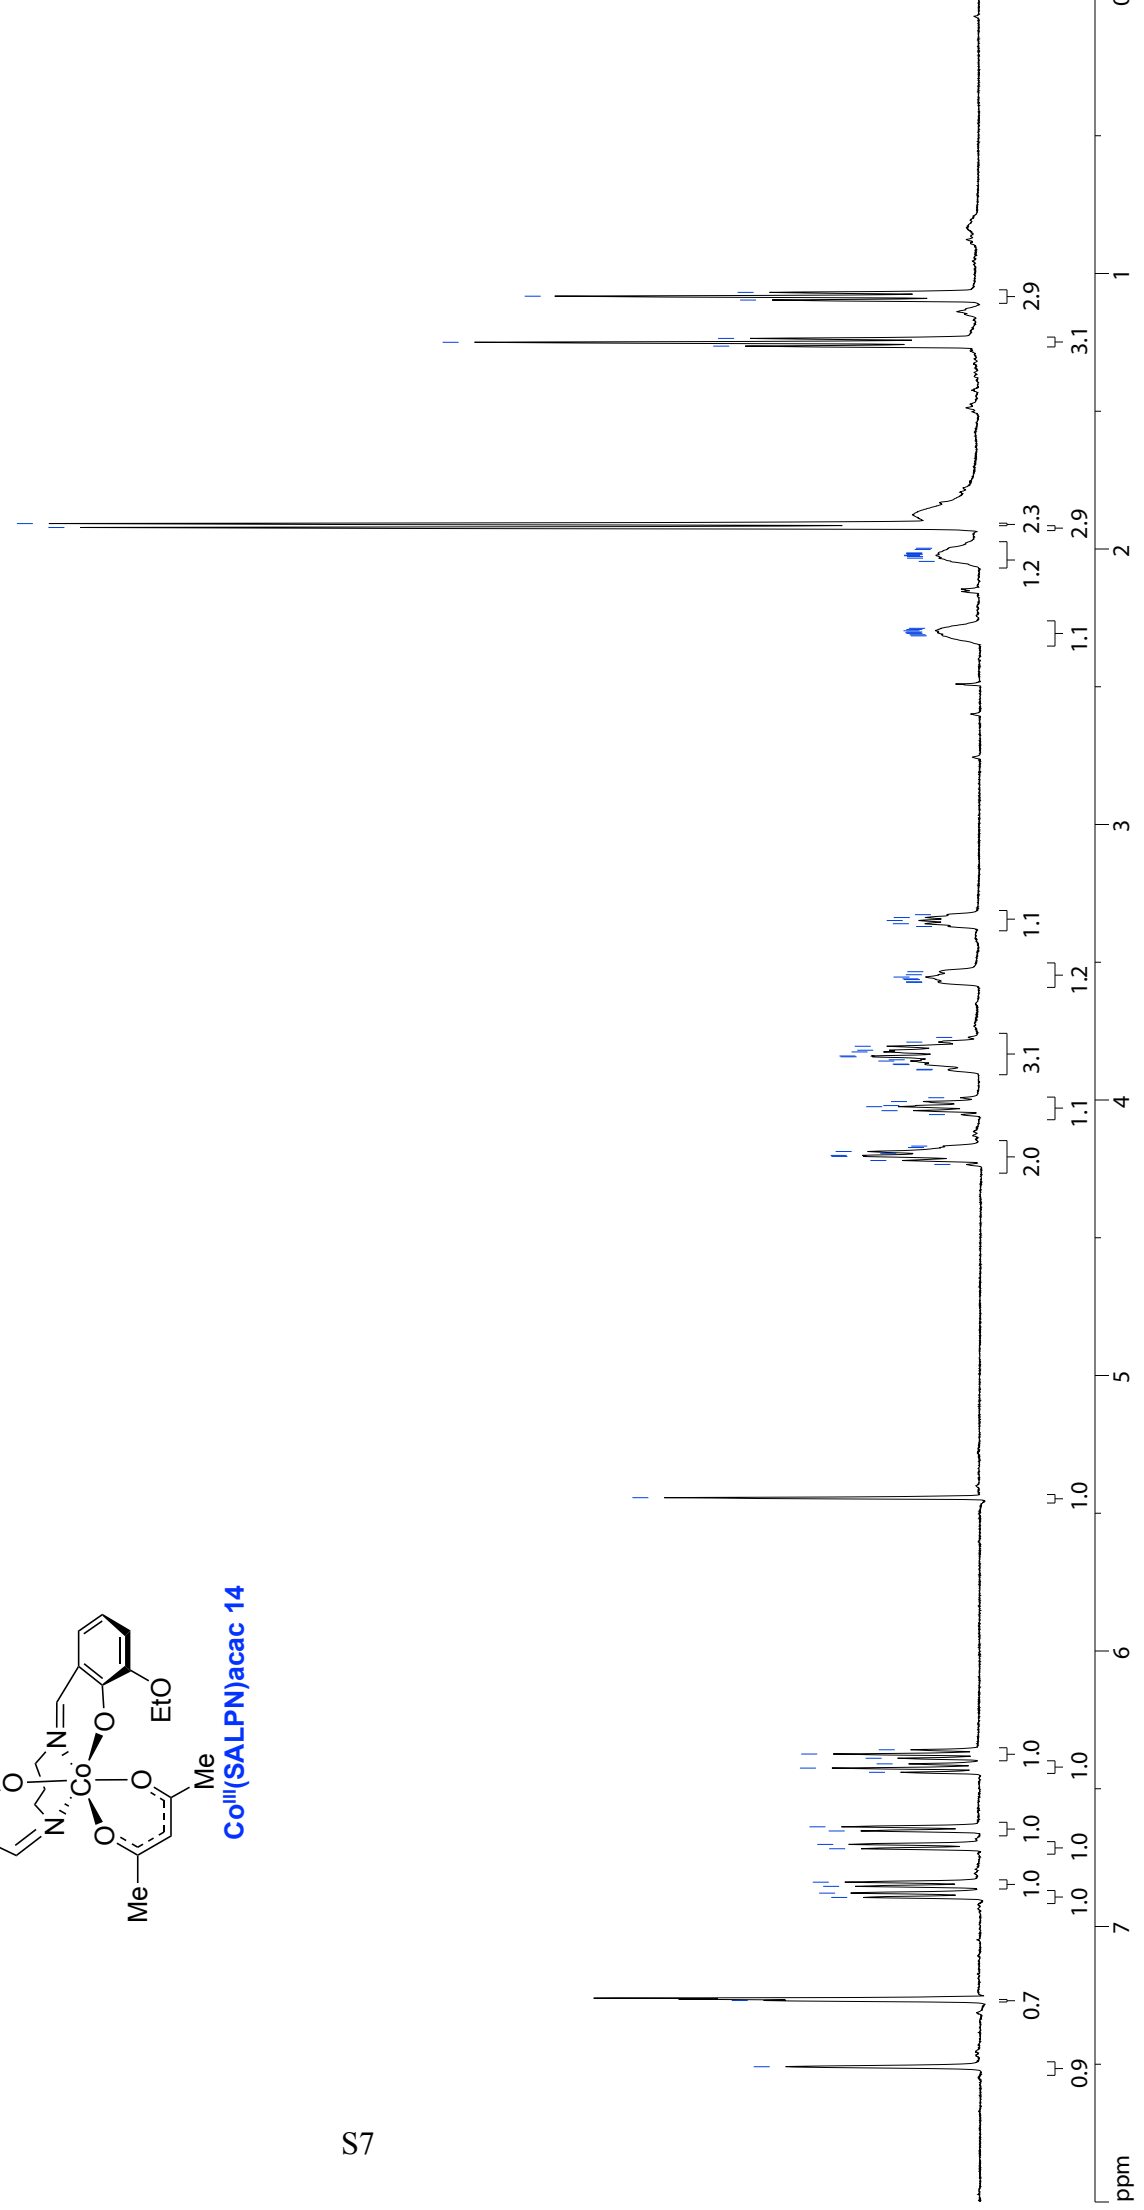





1.06  
1.05

2.41  
2.41  
2.42  
2.42  
2.43  
2.43  
2.44  
2.44  
2.45  
2.45  
2.46  
2.47  
2.47  
2.48  
2.48  
2.49  
2.49

3.84

6.09  
6.09  
6.12  
6.12  
6.87  
6.88  
6.88  
6.89  
6.91  
7.21  
7.21  
7.21  
7.21  
7.22  
7.22  
7.22  
7.24  
7.24  
7.24  
7.25  
7.26  
7.27  
7.27  
7.31  
7.31  
7.32  
7.33  
7.33

<sup>1</sup>H NMR spectrum (CDCl<sub>3</sub>, 600 MHz)

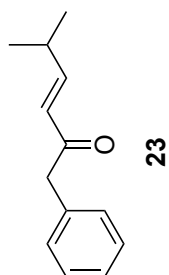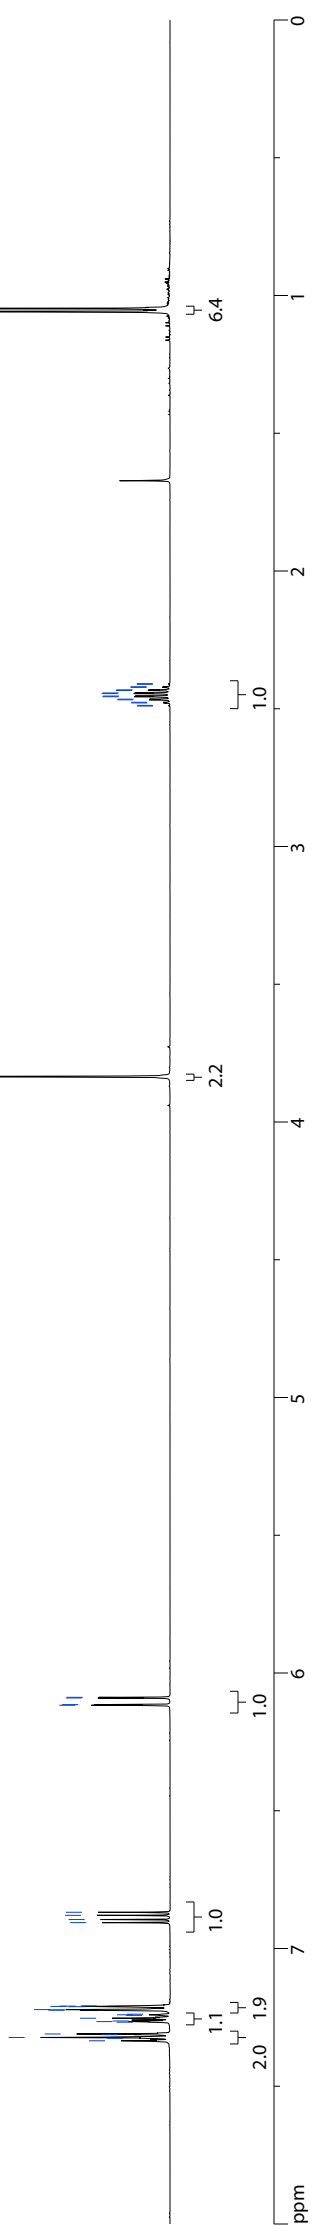

<sup>13</sup>C NMR spectrum (CDCl<sub>3</sub>, 151 MHz)

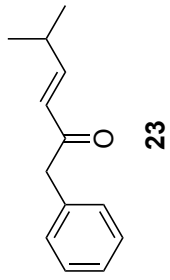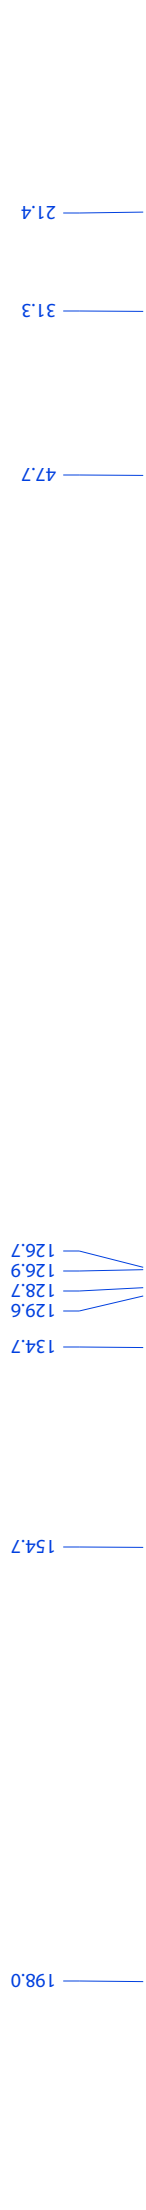

<sup>1</sup>H NMR spectrum (CDCl<sub>3</sub>, 400 MHz)

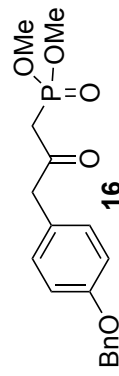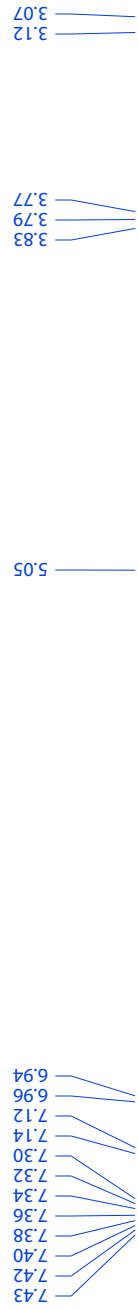

<sup>13</sup>C NMR spectrum (CDCl<sub>3</sub>, 151 MHz)

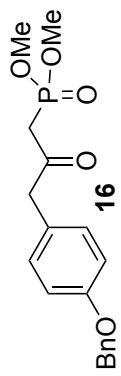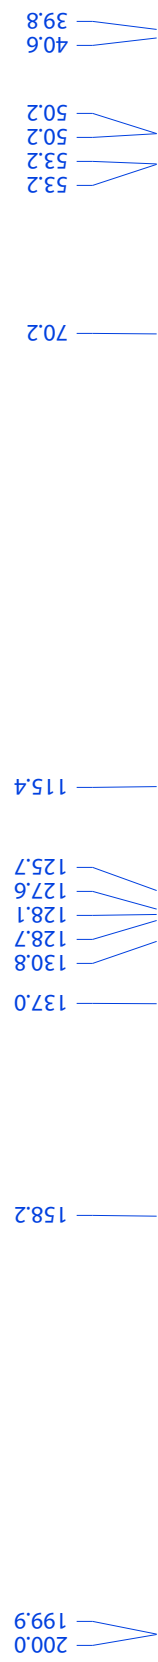

<sup>1</sup>H NMR spectrum (CDCl<sub>3</sub>, 600 MHz)

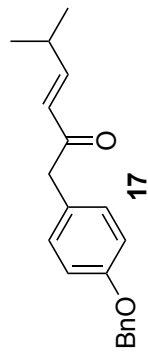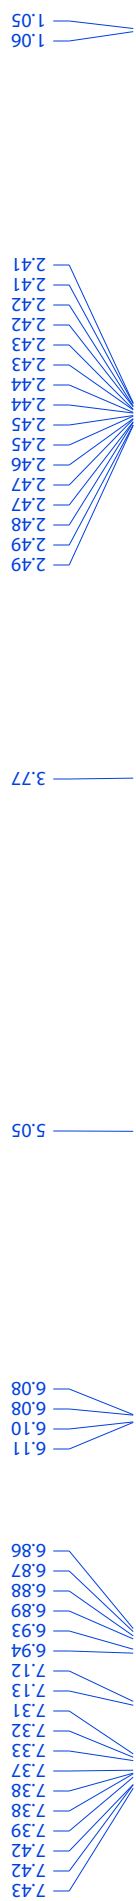

<sup>13</sup>C NMR spectrum (CDCl<sub>3</sub>, 151 MHz)

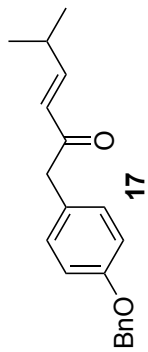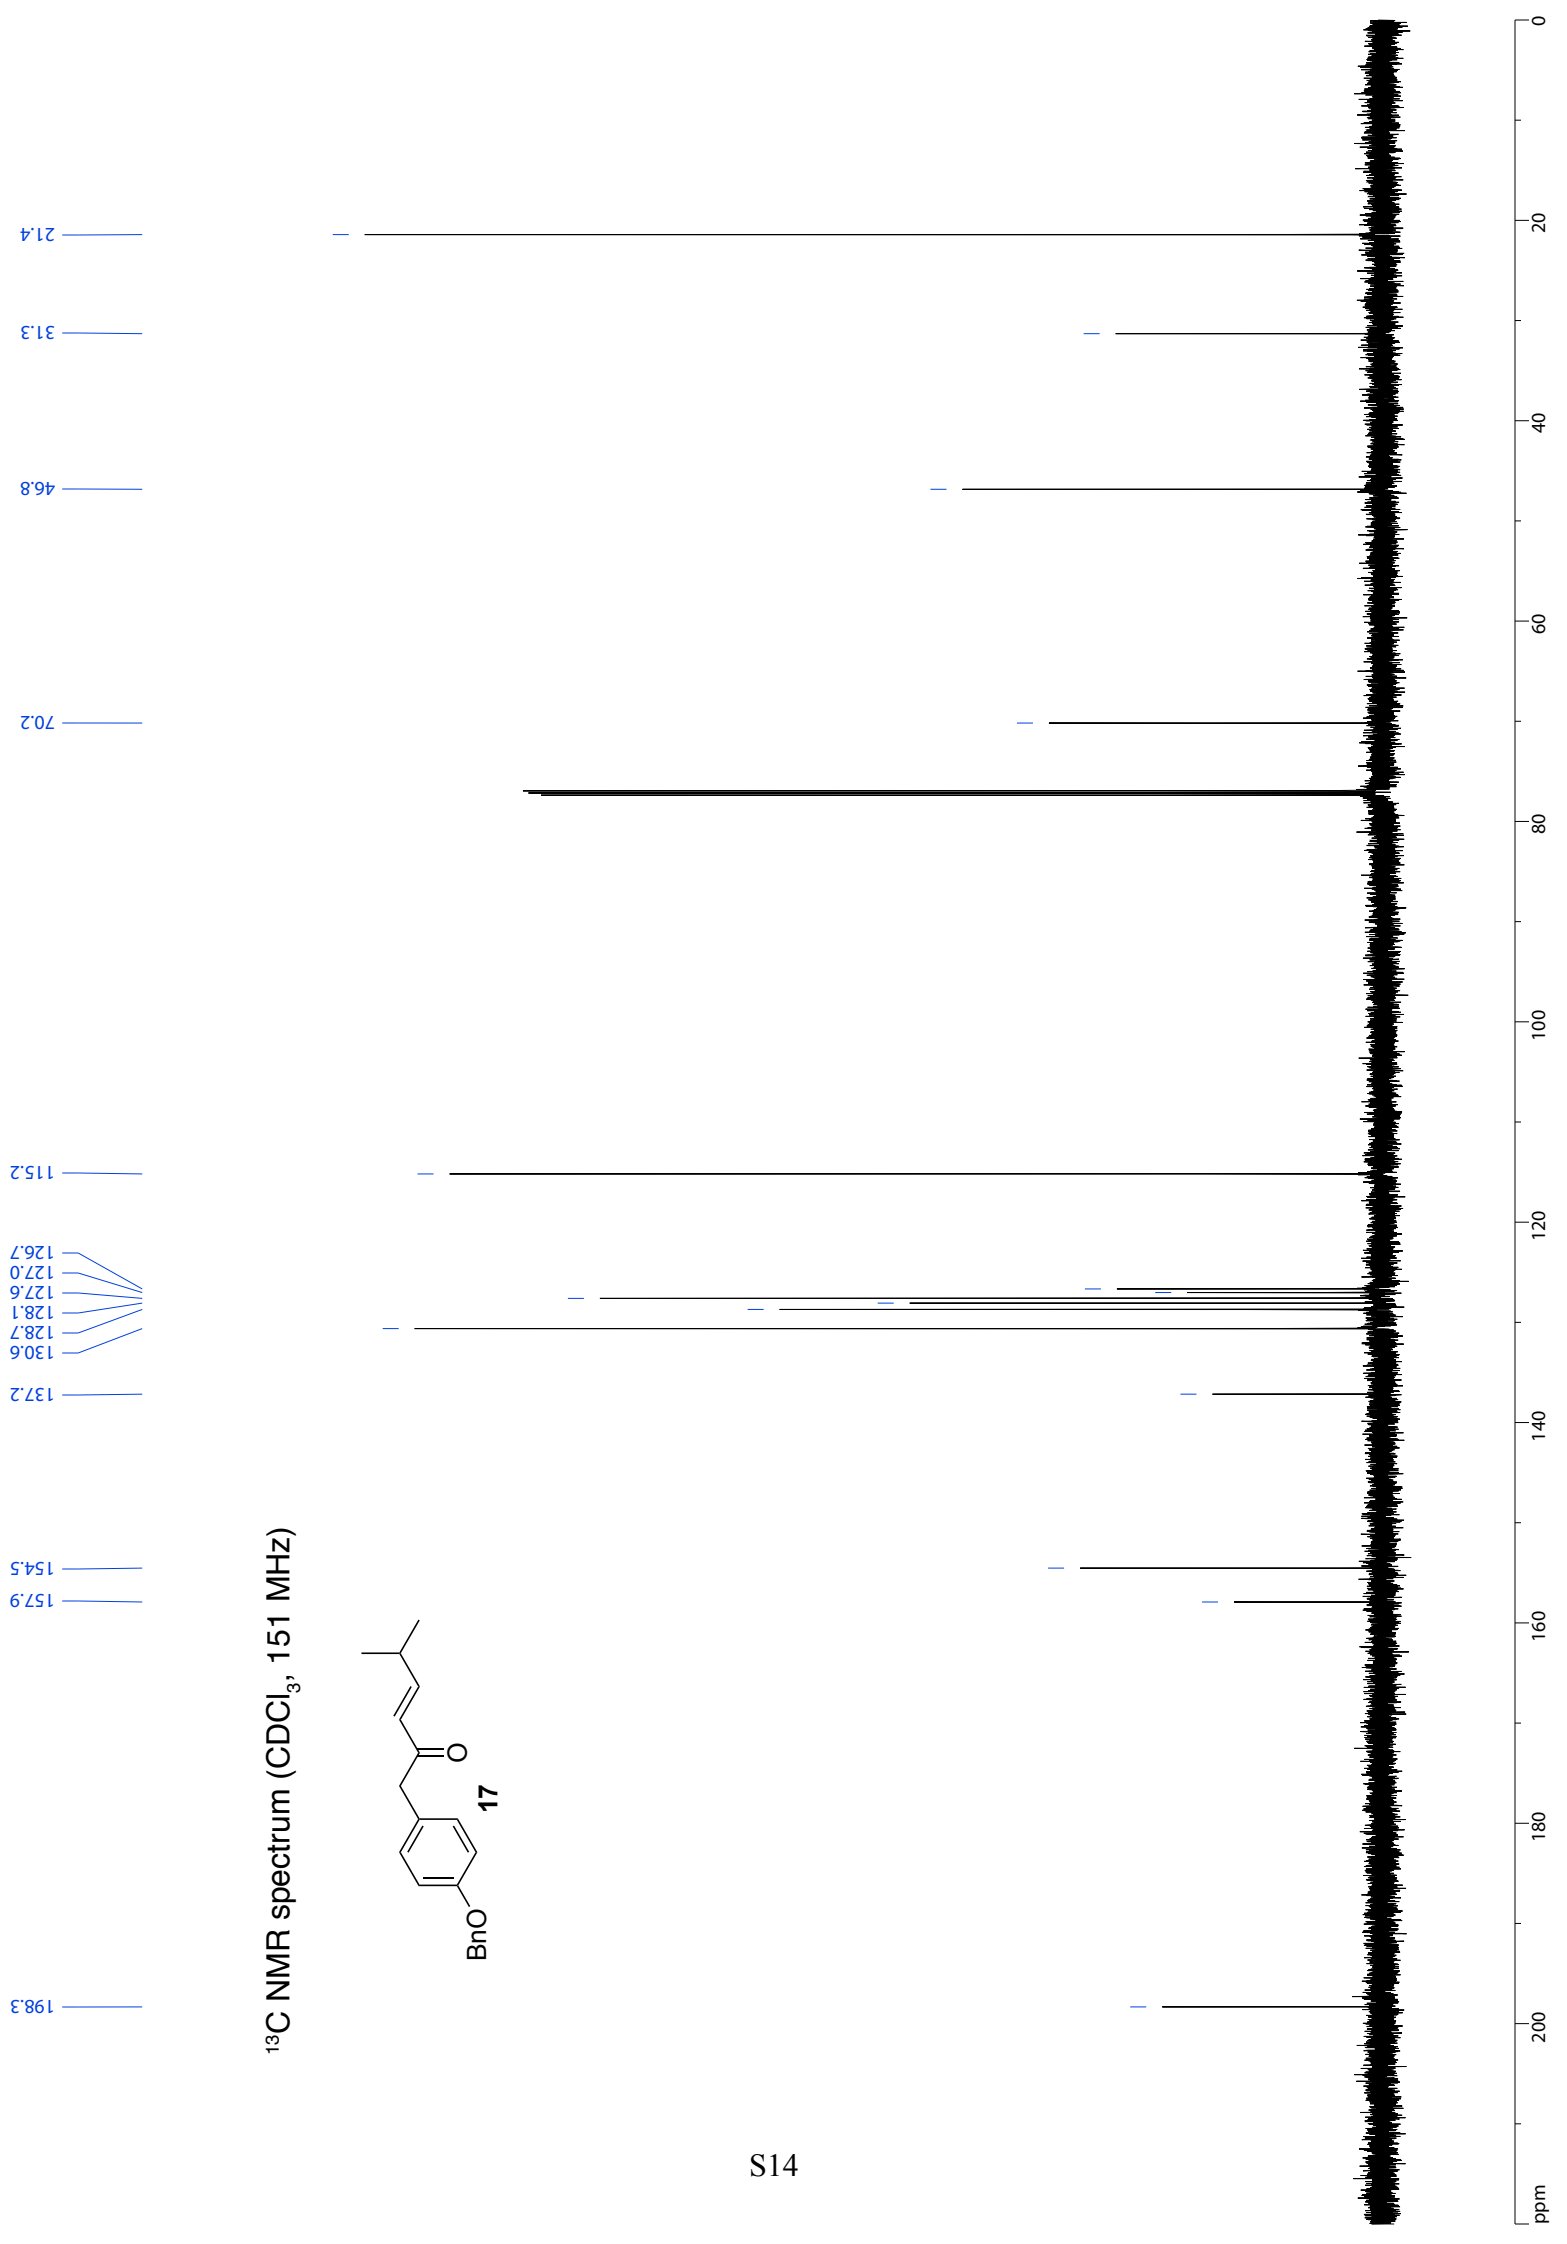



$^{13}\text{C}$  NMR spectrum ( $\text{CDCl}_3$ , 151 MHz)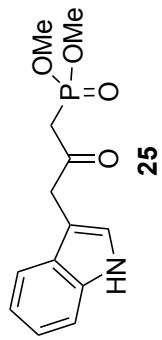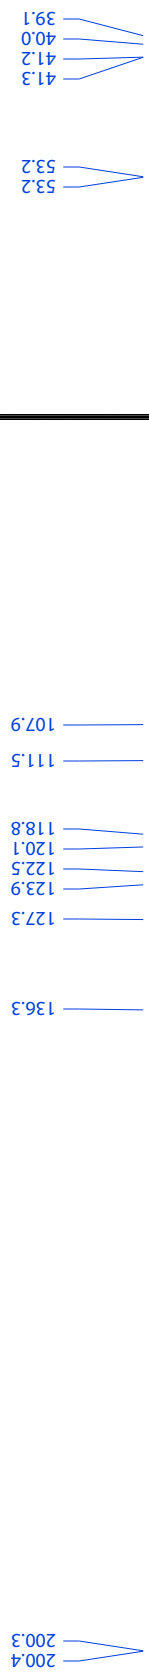





<sup>13</sup>C NMR spectrum (CDCl<sub>3</sub>, 151 MHz)

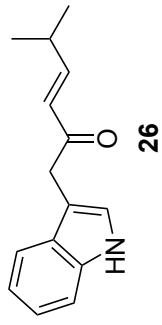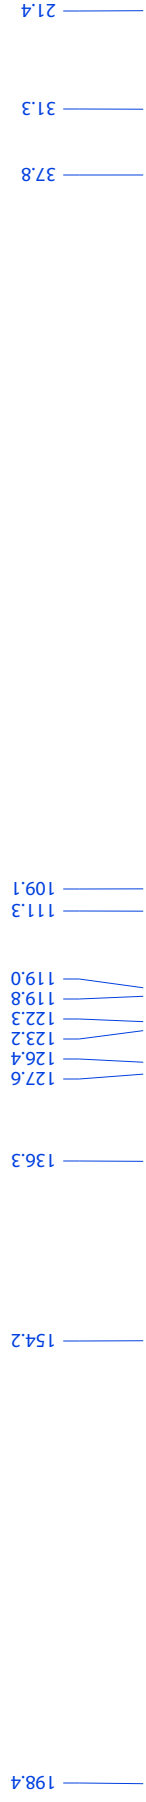

<sup>1</sup>H NMR spectrum (CDCl<sub>3</sub>, 500 MHz)

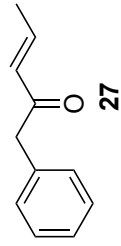

1.89  
1.88  
1.87  
1.87  
1.87

3.81

7.34  
7.33  
7.31  
7.27  
7.26  
7.24  
7.22  
7.22  
7.22  
7.21  
7.20  
6.97  
6.96  
6.95  
6.94  
6.93  
6.93  
6.90  
6.19  
6.19  
6.19  
6.18  
6.16  
6.16  
6.15  
6.15

619

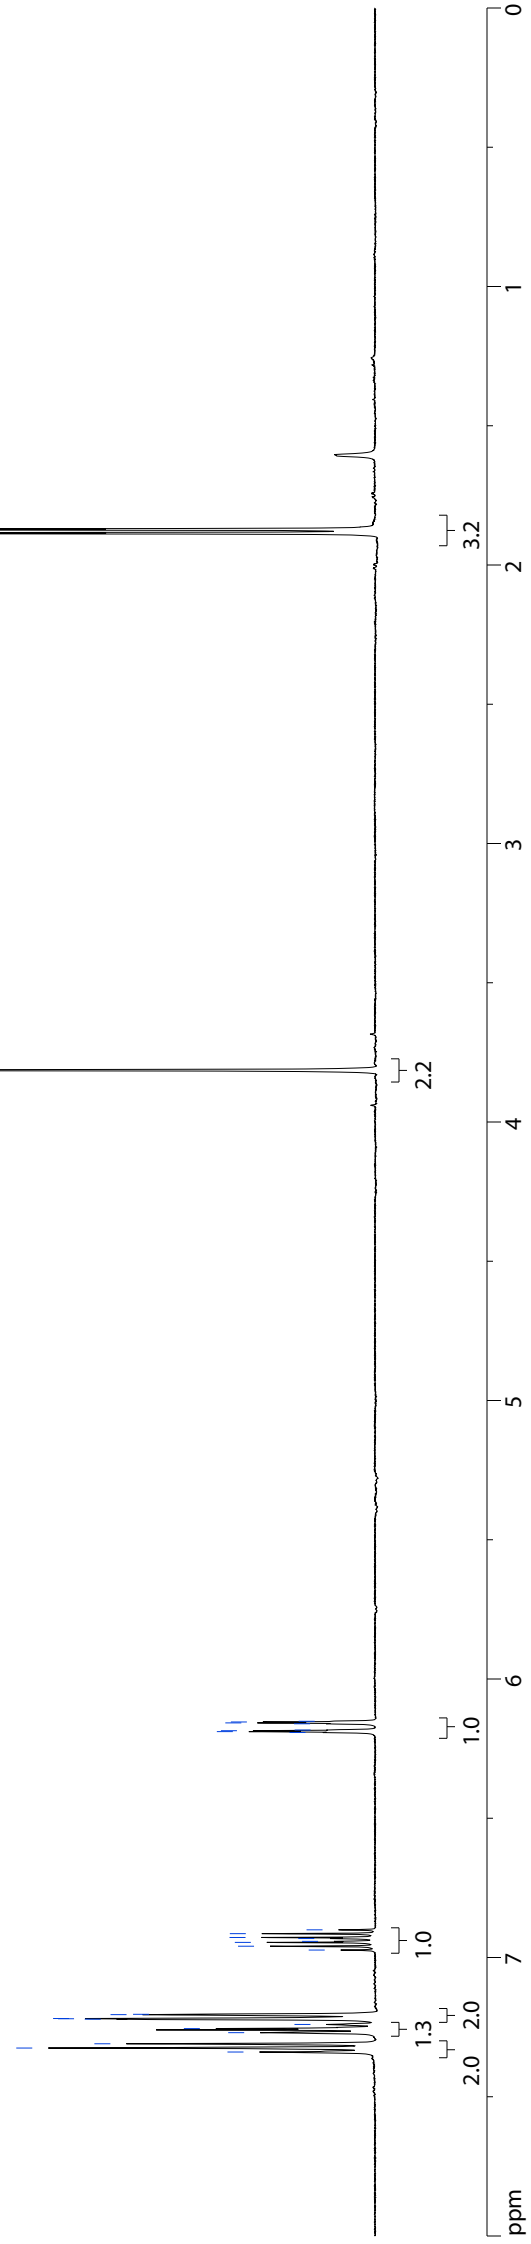

<sup>13</sup>C NMR spectrum (CDCl<sub>3</sub>, 126 MHz)

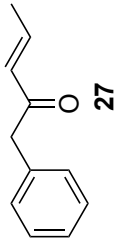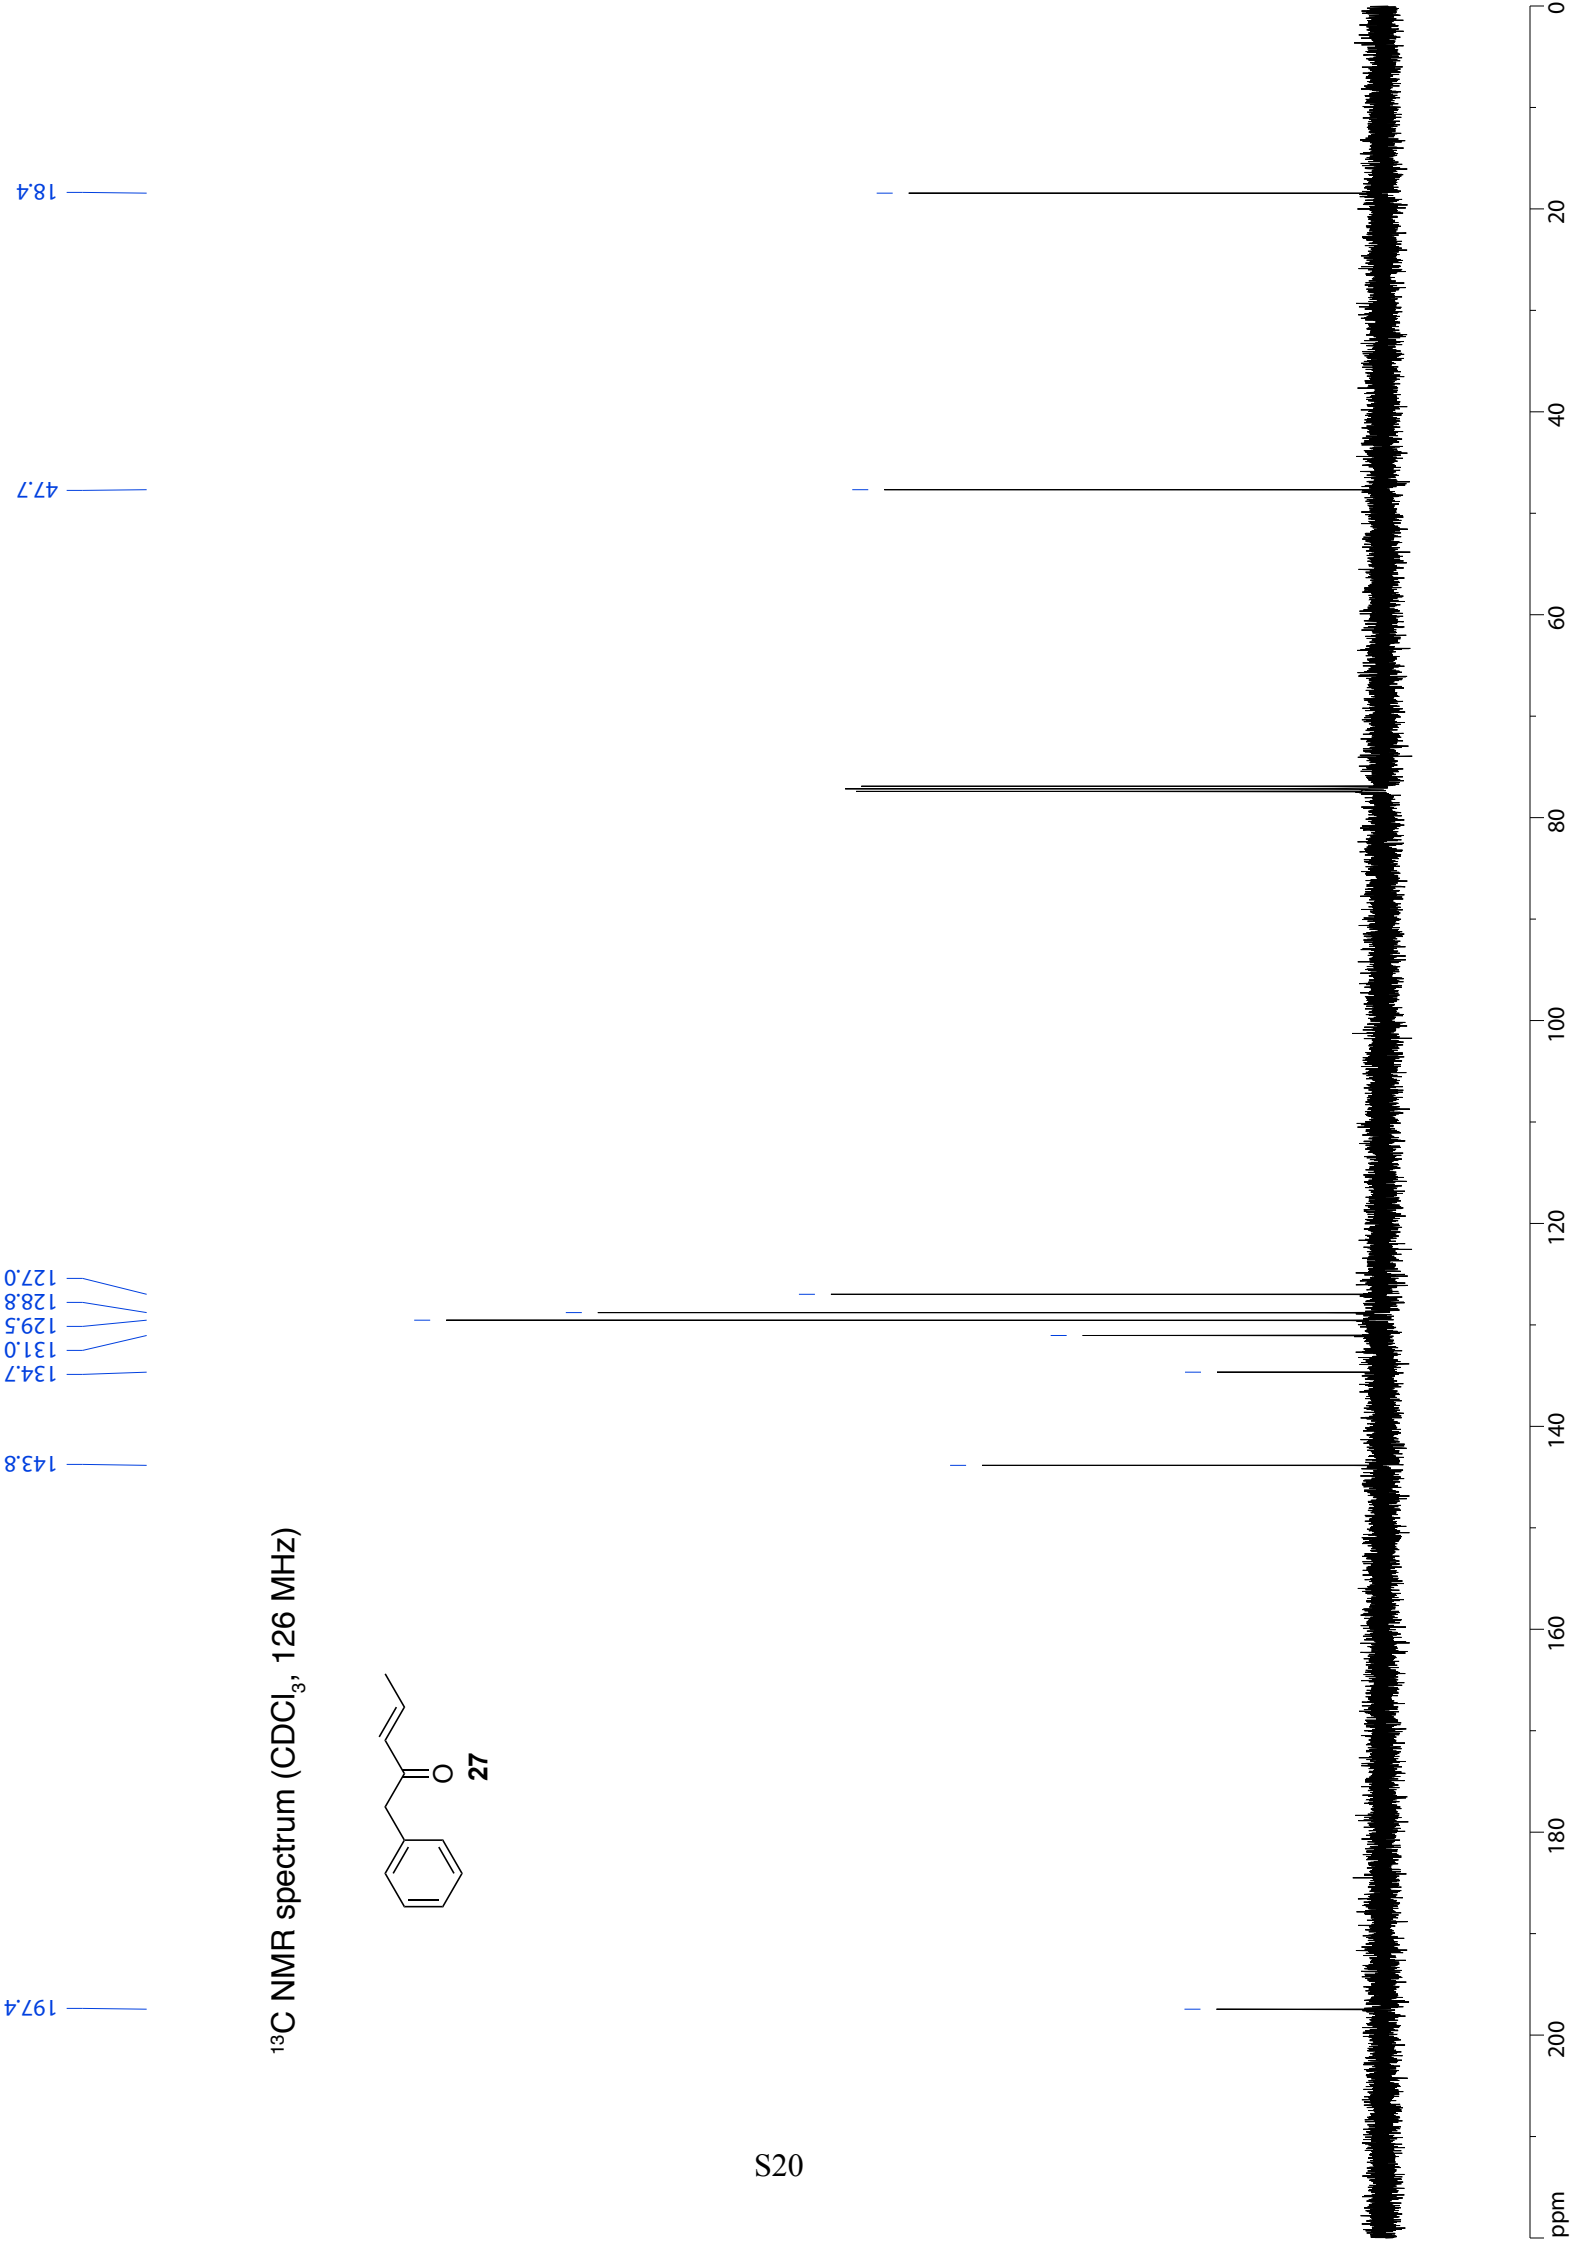

7.33  
7.31  
7.29  
7.25  
7.24  
7.23

<sup>1</sup>H NMR spectrum (CDCl<sub>3</sub>, 400 MHz)

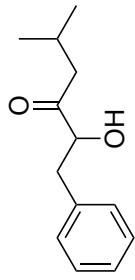

Sattabacin (1)

3.43  
3.42  
3.15  
3.14  
3.12  
3.11  
2.85  
2.83  
2.82  
2.80  
2.38  
2.36  
2.23  
2.21  
2.20  
2.18  
2.16  
2.15  
2.13

0.93  
0.91

4.40  
4.39  
4.38  
4.38  
4.37  
4.37  
4.36  
4.36

1.9  
2.7

1.4  
2.0

1.2  
1.1  
0.9

6.1

ppm

<sup>13</sup>C NMR spectrum (CDCl<sub>3</sub>, 101 MHz)

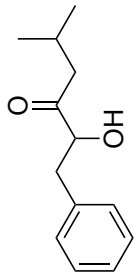

Sattabacin (1)

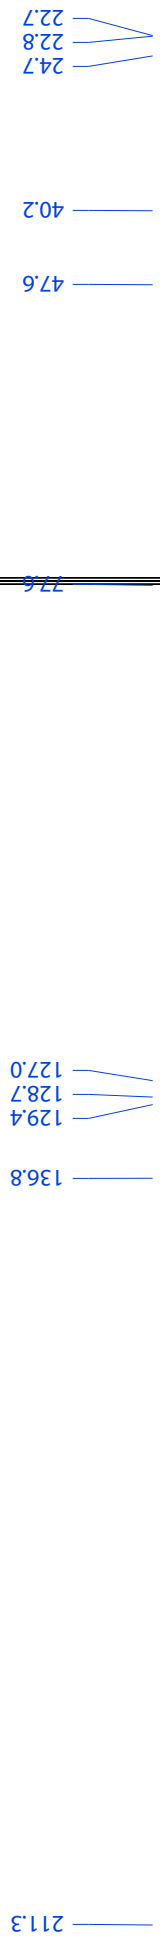

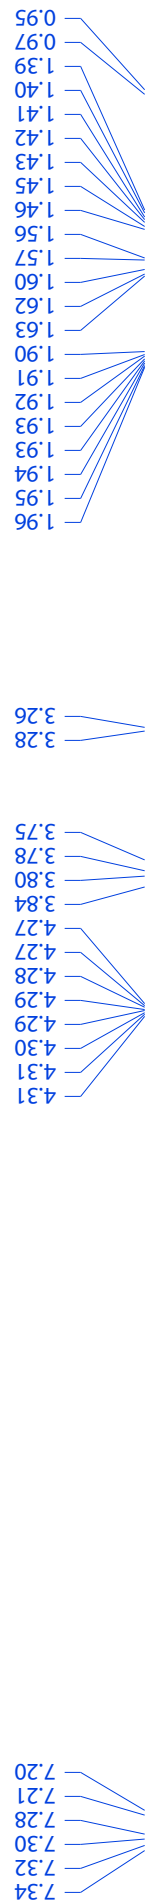

$^1\text{H}$  NMR spectrum ( $\text{CDCl}_3$ , 400 MHz)

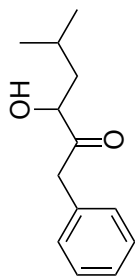

Isosattabacin (**24**)

<sup>13</sup>C NMR spectrum (CDCl<sub>3</sub>, 151 MHz)

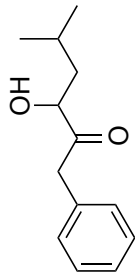

Isosattabacin (**24**)

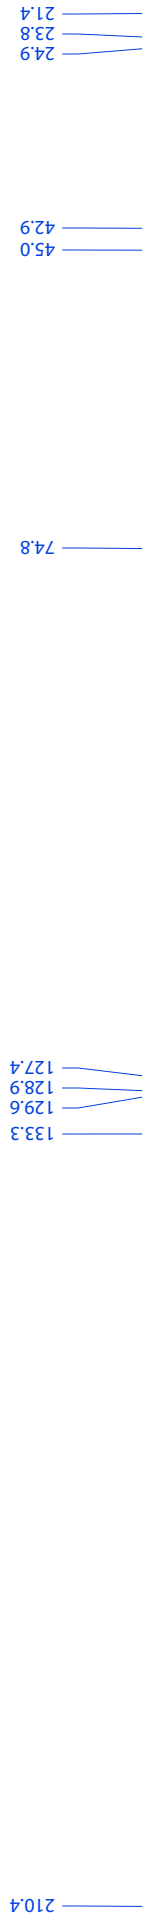



<sup>1</sup>H NMR spectrum (CDCl<sub>3</sub>, 500 MHz)

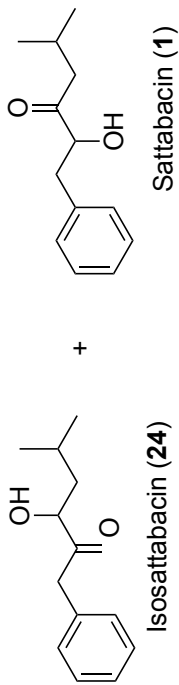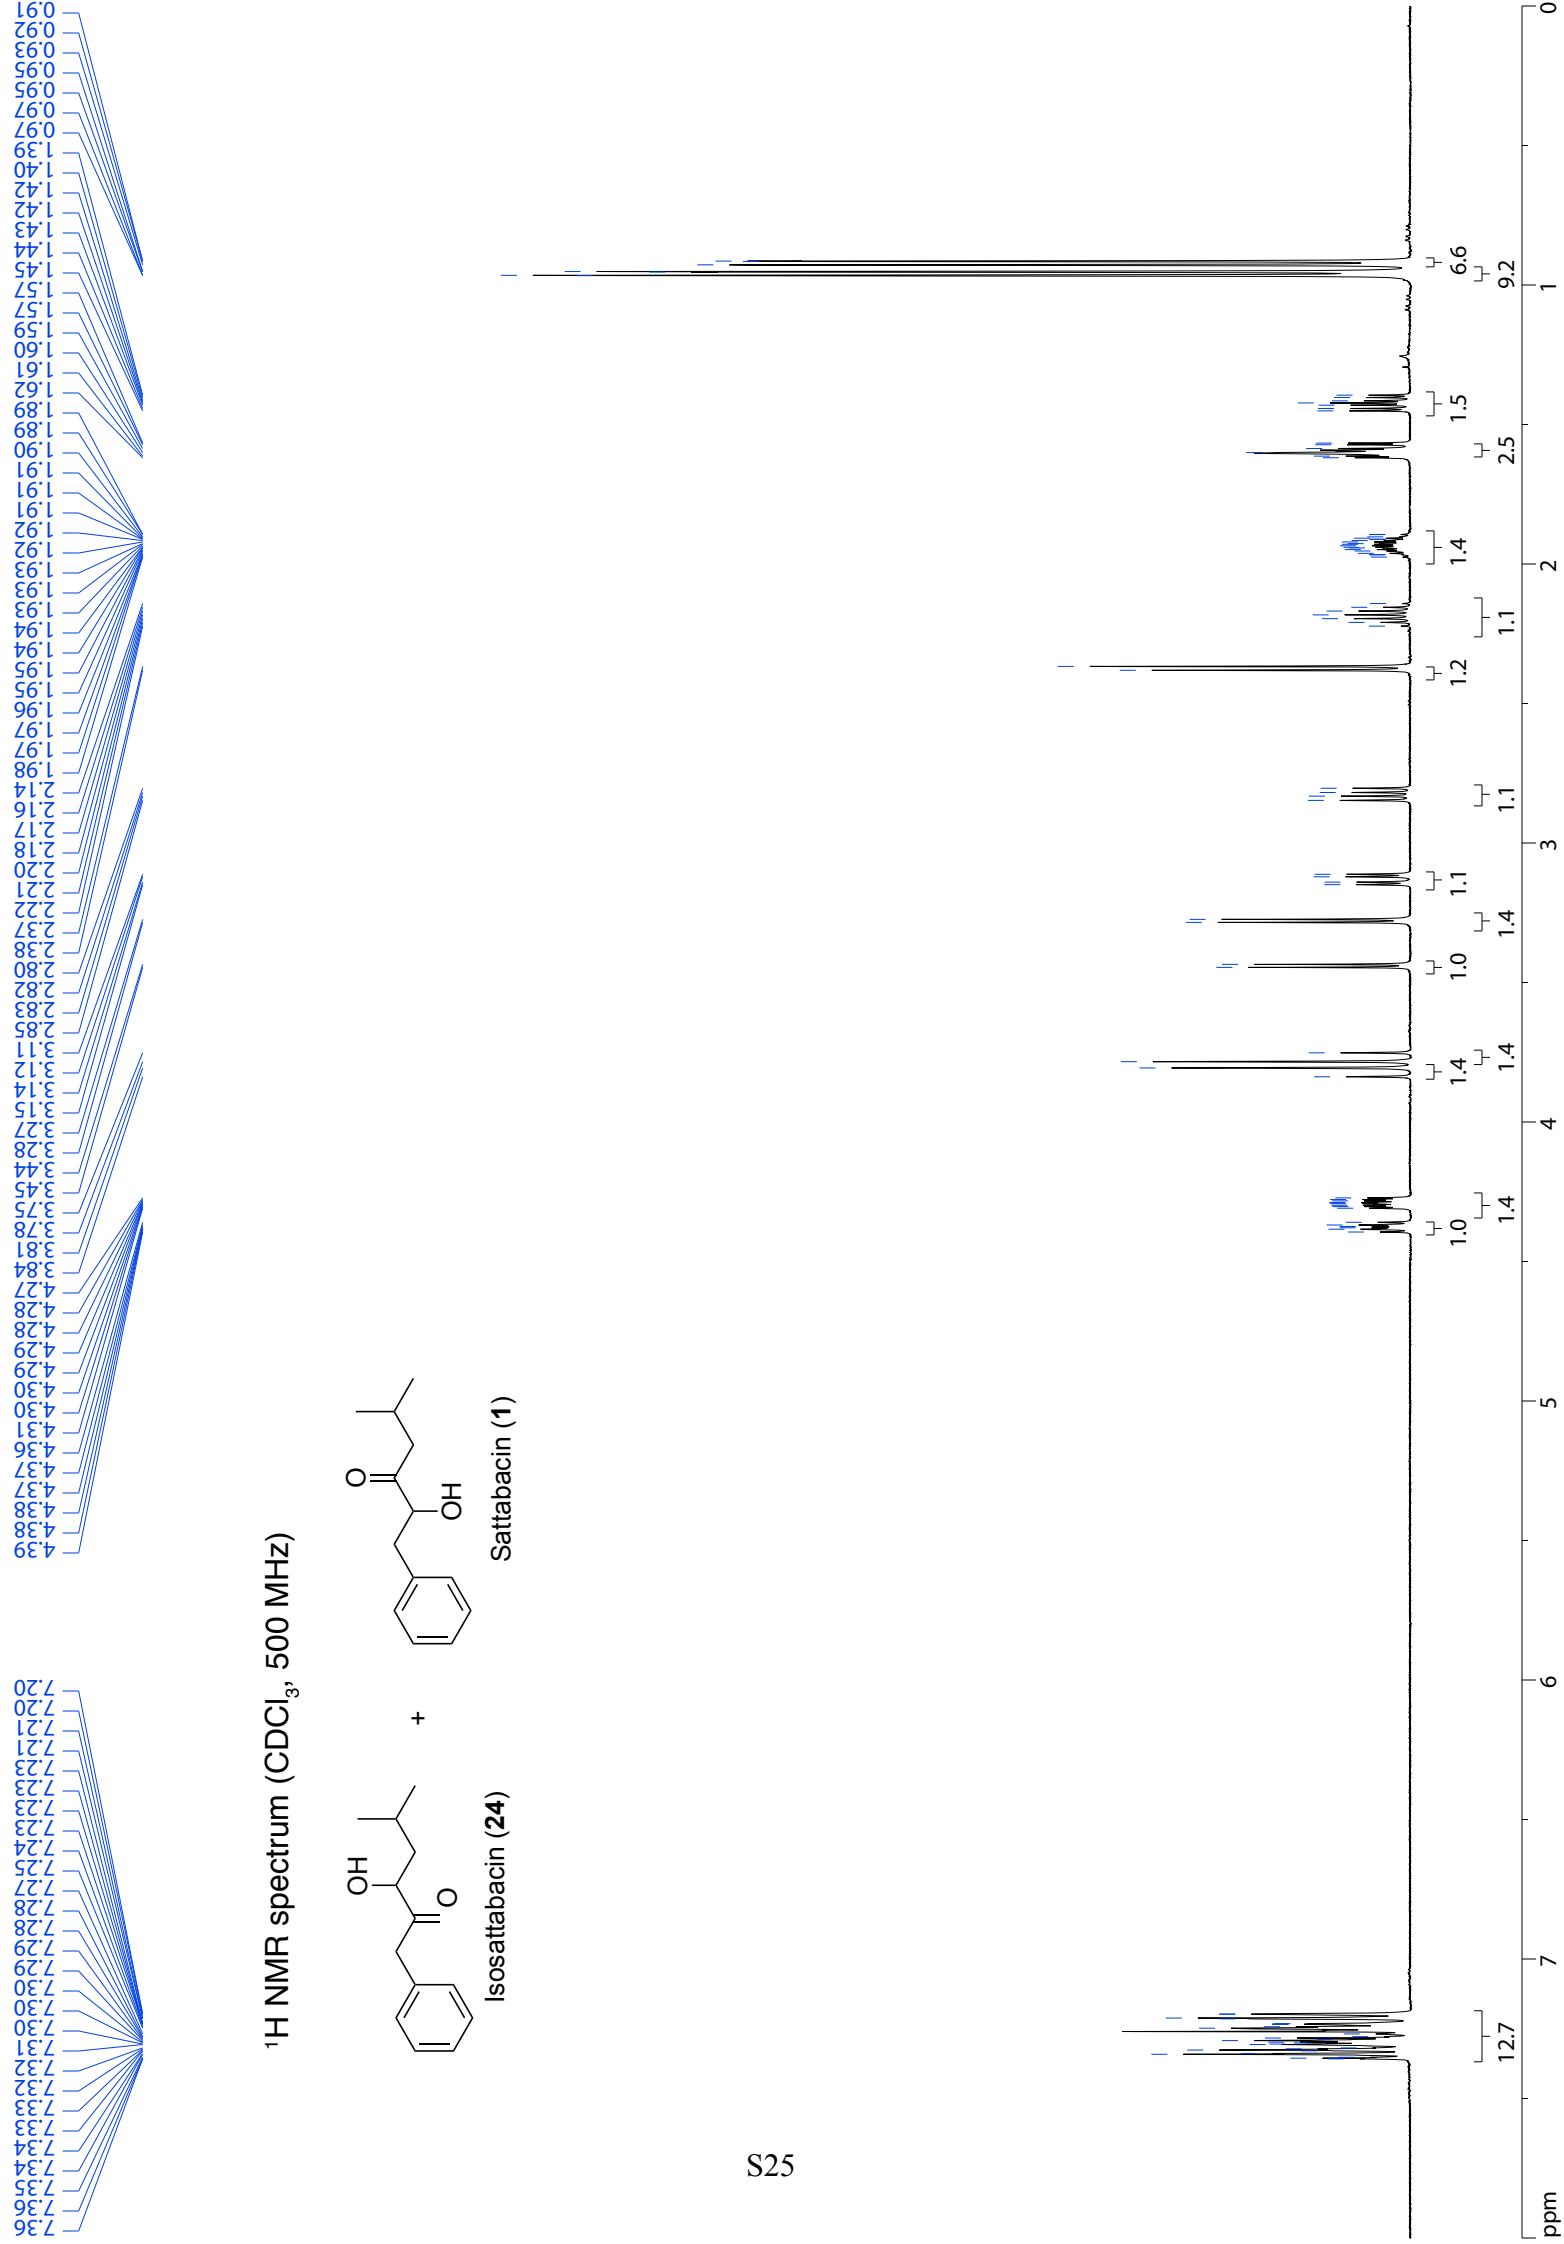

0.91  
0.93  
0.93  
0.94  
1.40  
1.41  
1.42  
1.43  
1.43  
1.44  
1.45  
1.47  
1.48  
1.49  
1.49  
1.50  
1.51  
1.52  
1.78  
1.79  
1.80  
1.81  
1.81  
1.82  
1.83  
1.84  
1.84  
1.85  
1.86  
1.87

3.80  
4.18  
4.18  
4.19  
4.20

5.06

6.93  
6.94  
7.10  
7.12  
7.28  
7.29  
7.30  
7.34  
7.35  
7.37  
7.41  
7.42

<sup>1</sup>H NMR spectrum (d<sub>4</sub>-methanol, 600 MHz)

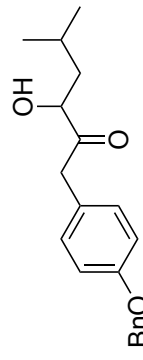

Sorophinol C benzyl ether (**18**)

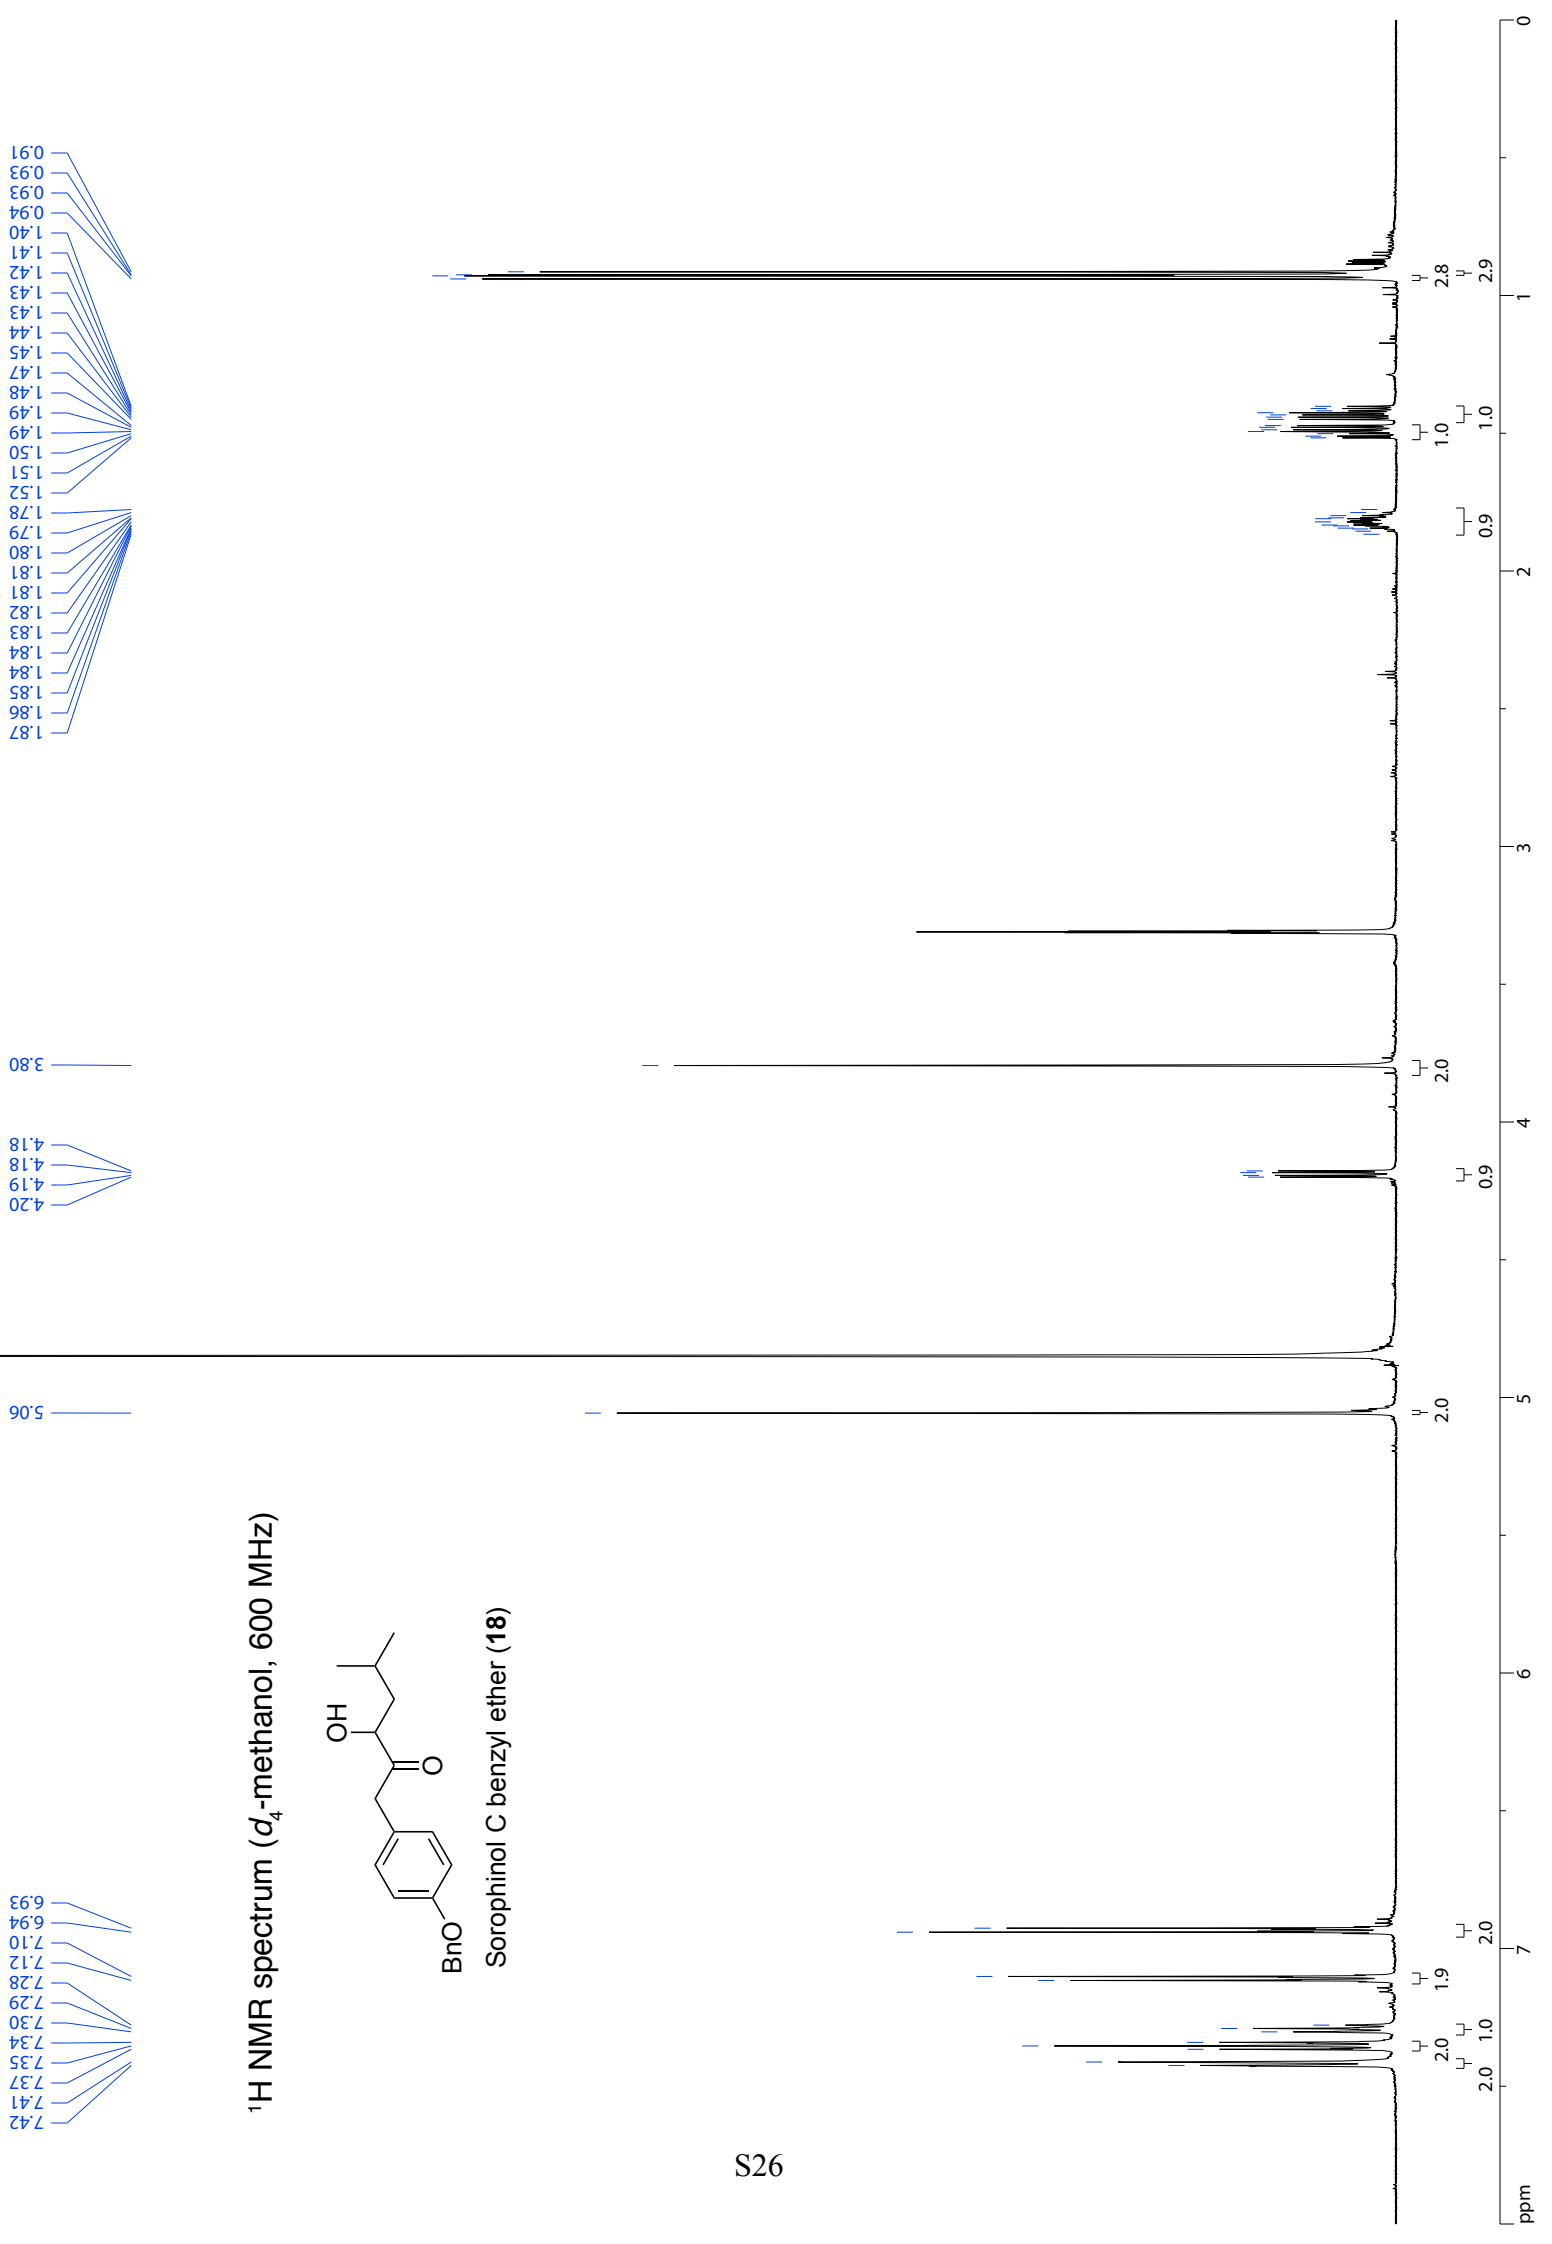

<sup>13</sup>C NMR spectrum (d<sub>4</sub>-methanol, 126 MHz)

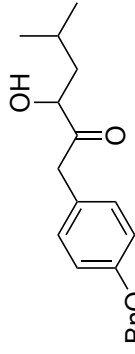

Sorophinol C benzyl ether (**18**)

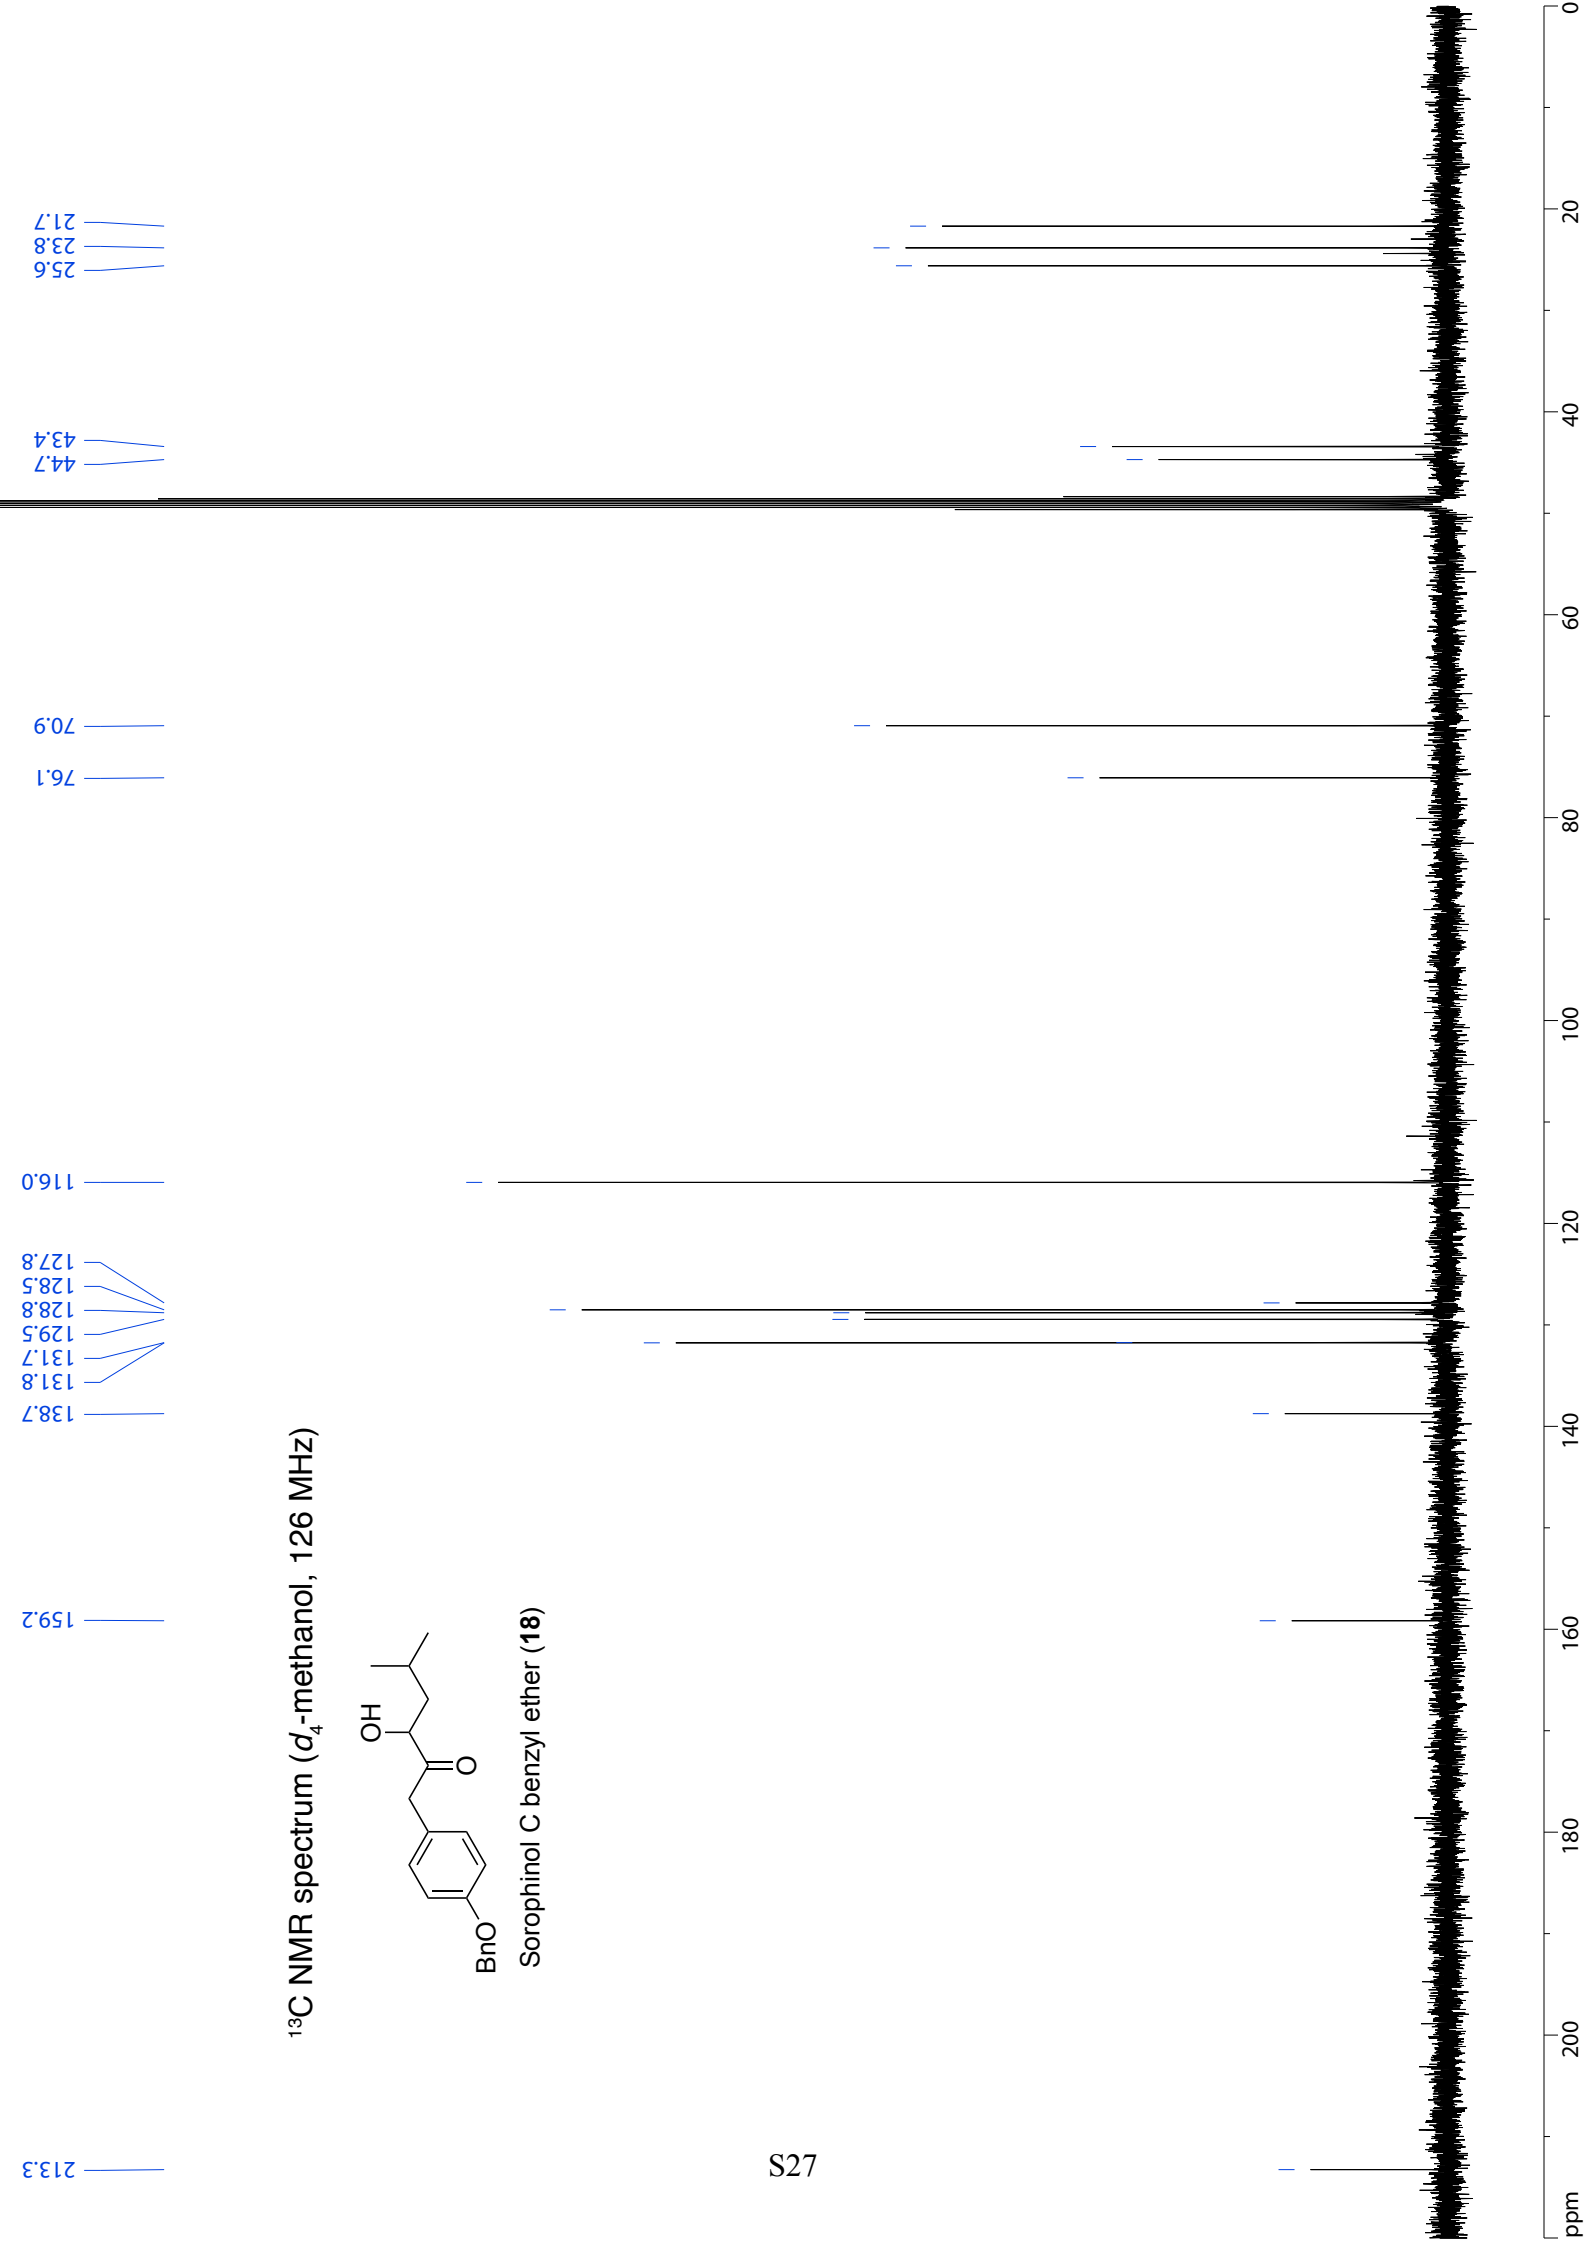

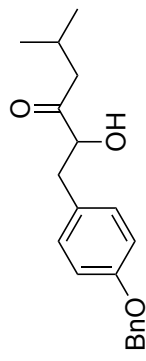

4-Hydroxysattabacin benzyl ether (**19**)

<sup>1</sup>H NMR spectrum (CDCl<sub>3</sub>, 400 MHz)

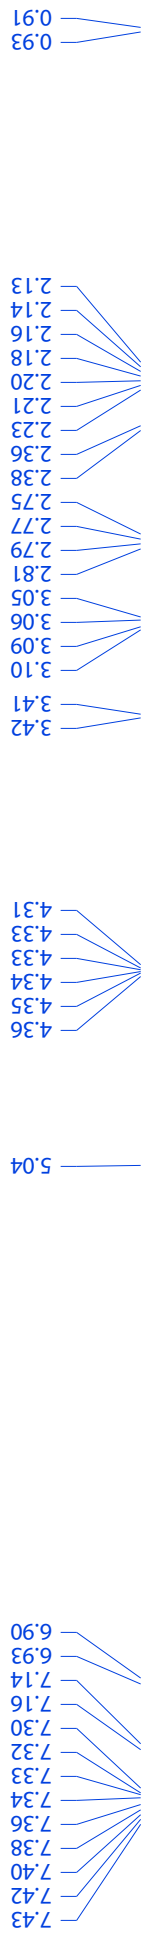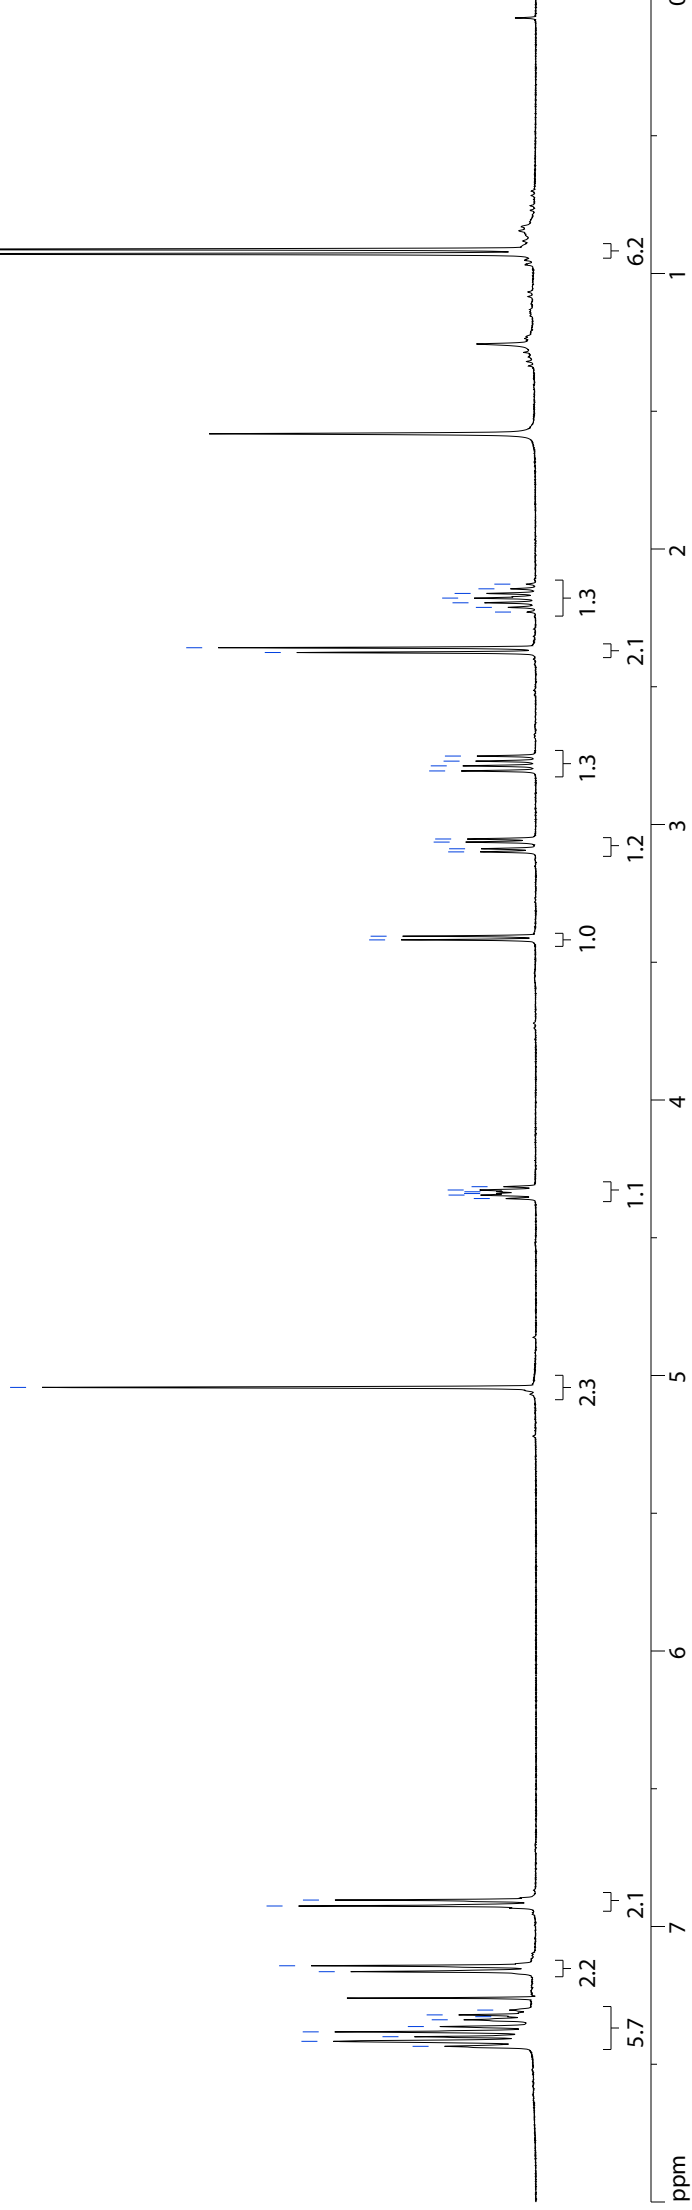

<sup>13</sup>C NMR spectrum (CDCl<sub>3</sub>, 101 MHz)

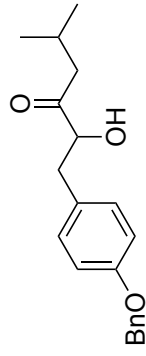

4-Hydroxysattabacin benzyl ether (19)

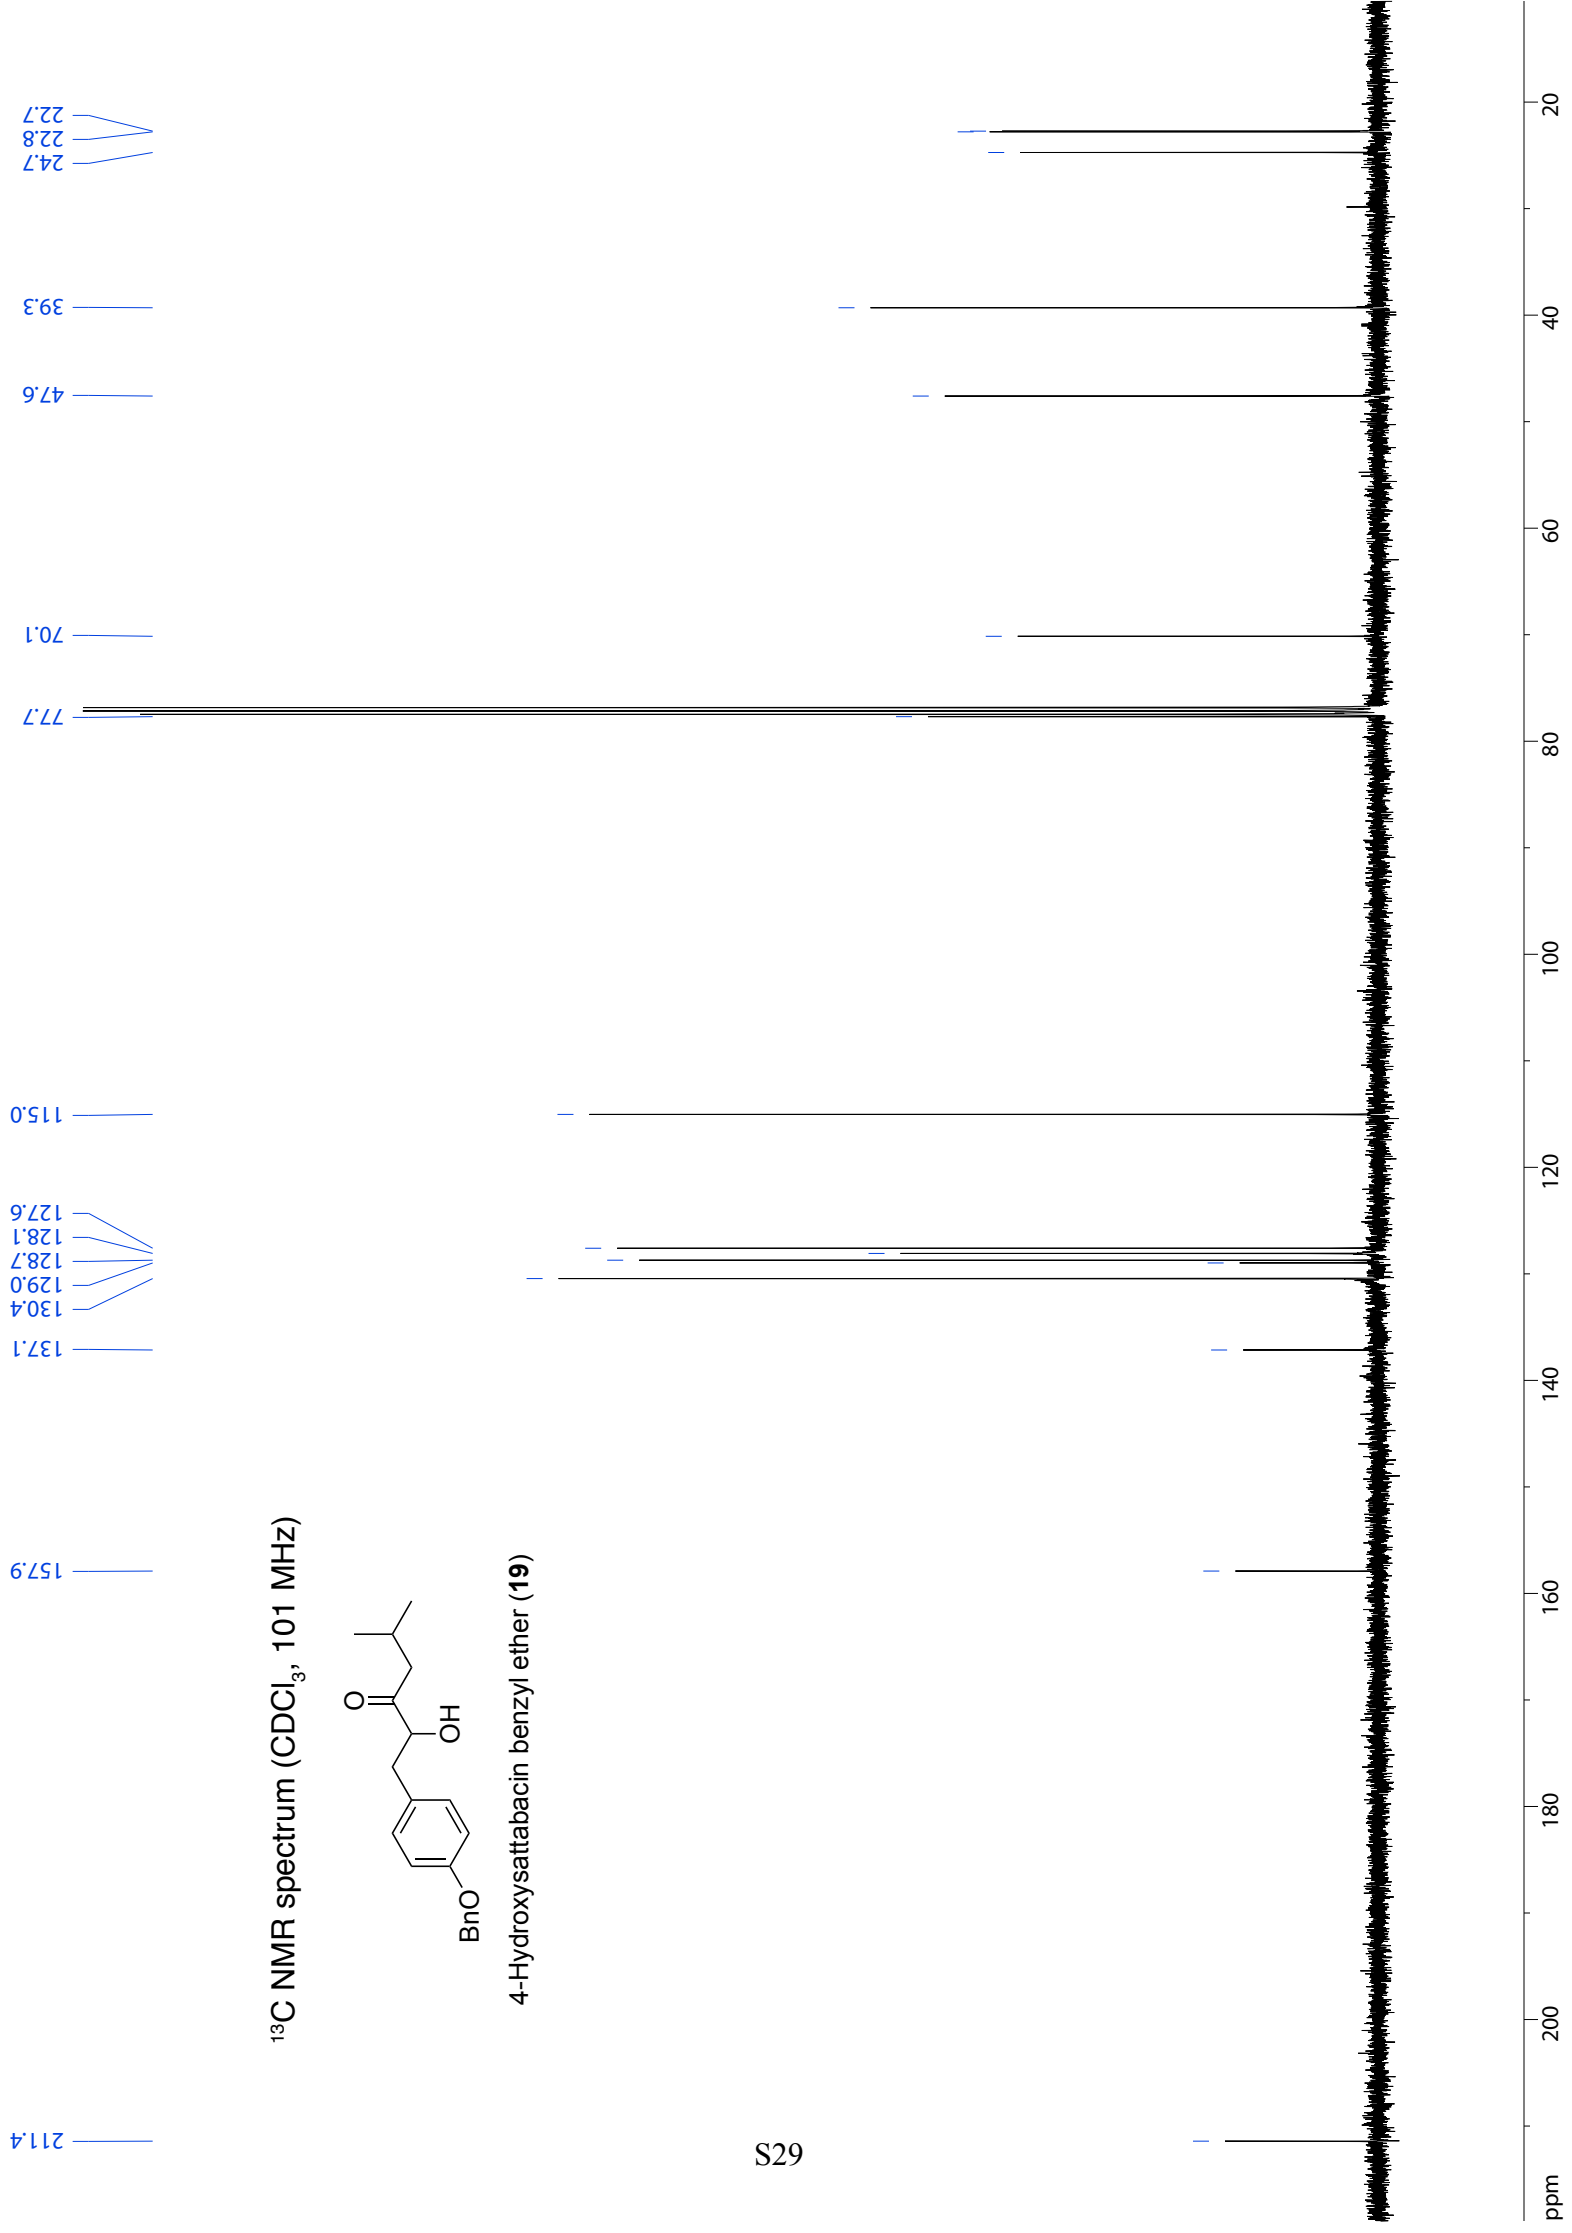



<sup>1</sup>H NMR spectrum (d<sub>4</sub>-methanol, 600 MHz)

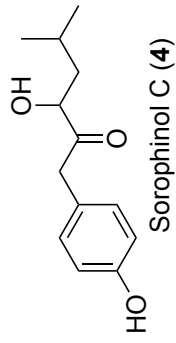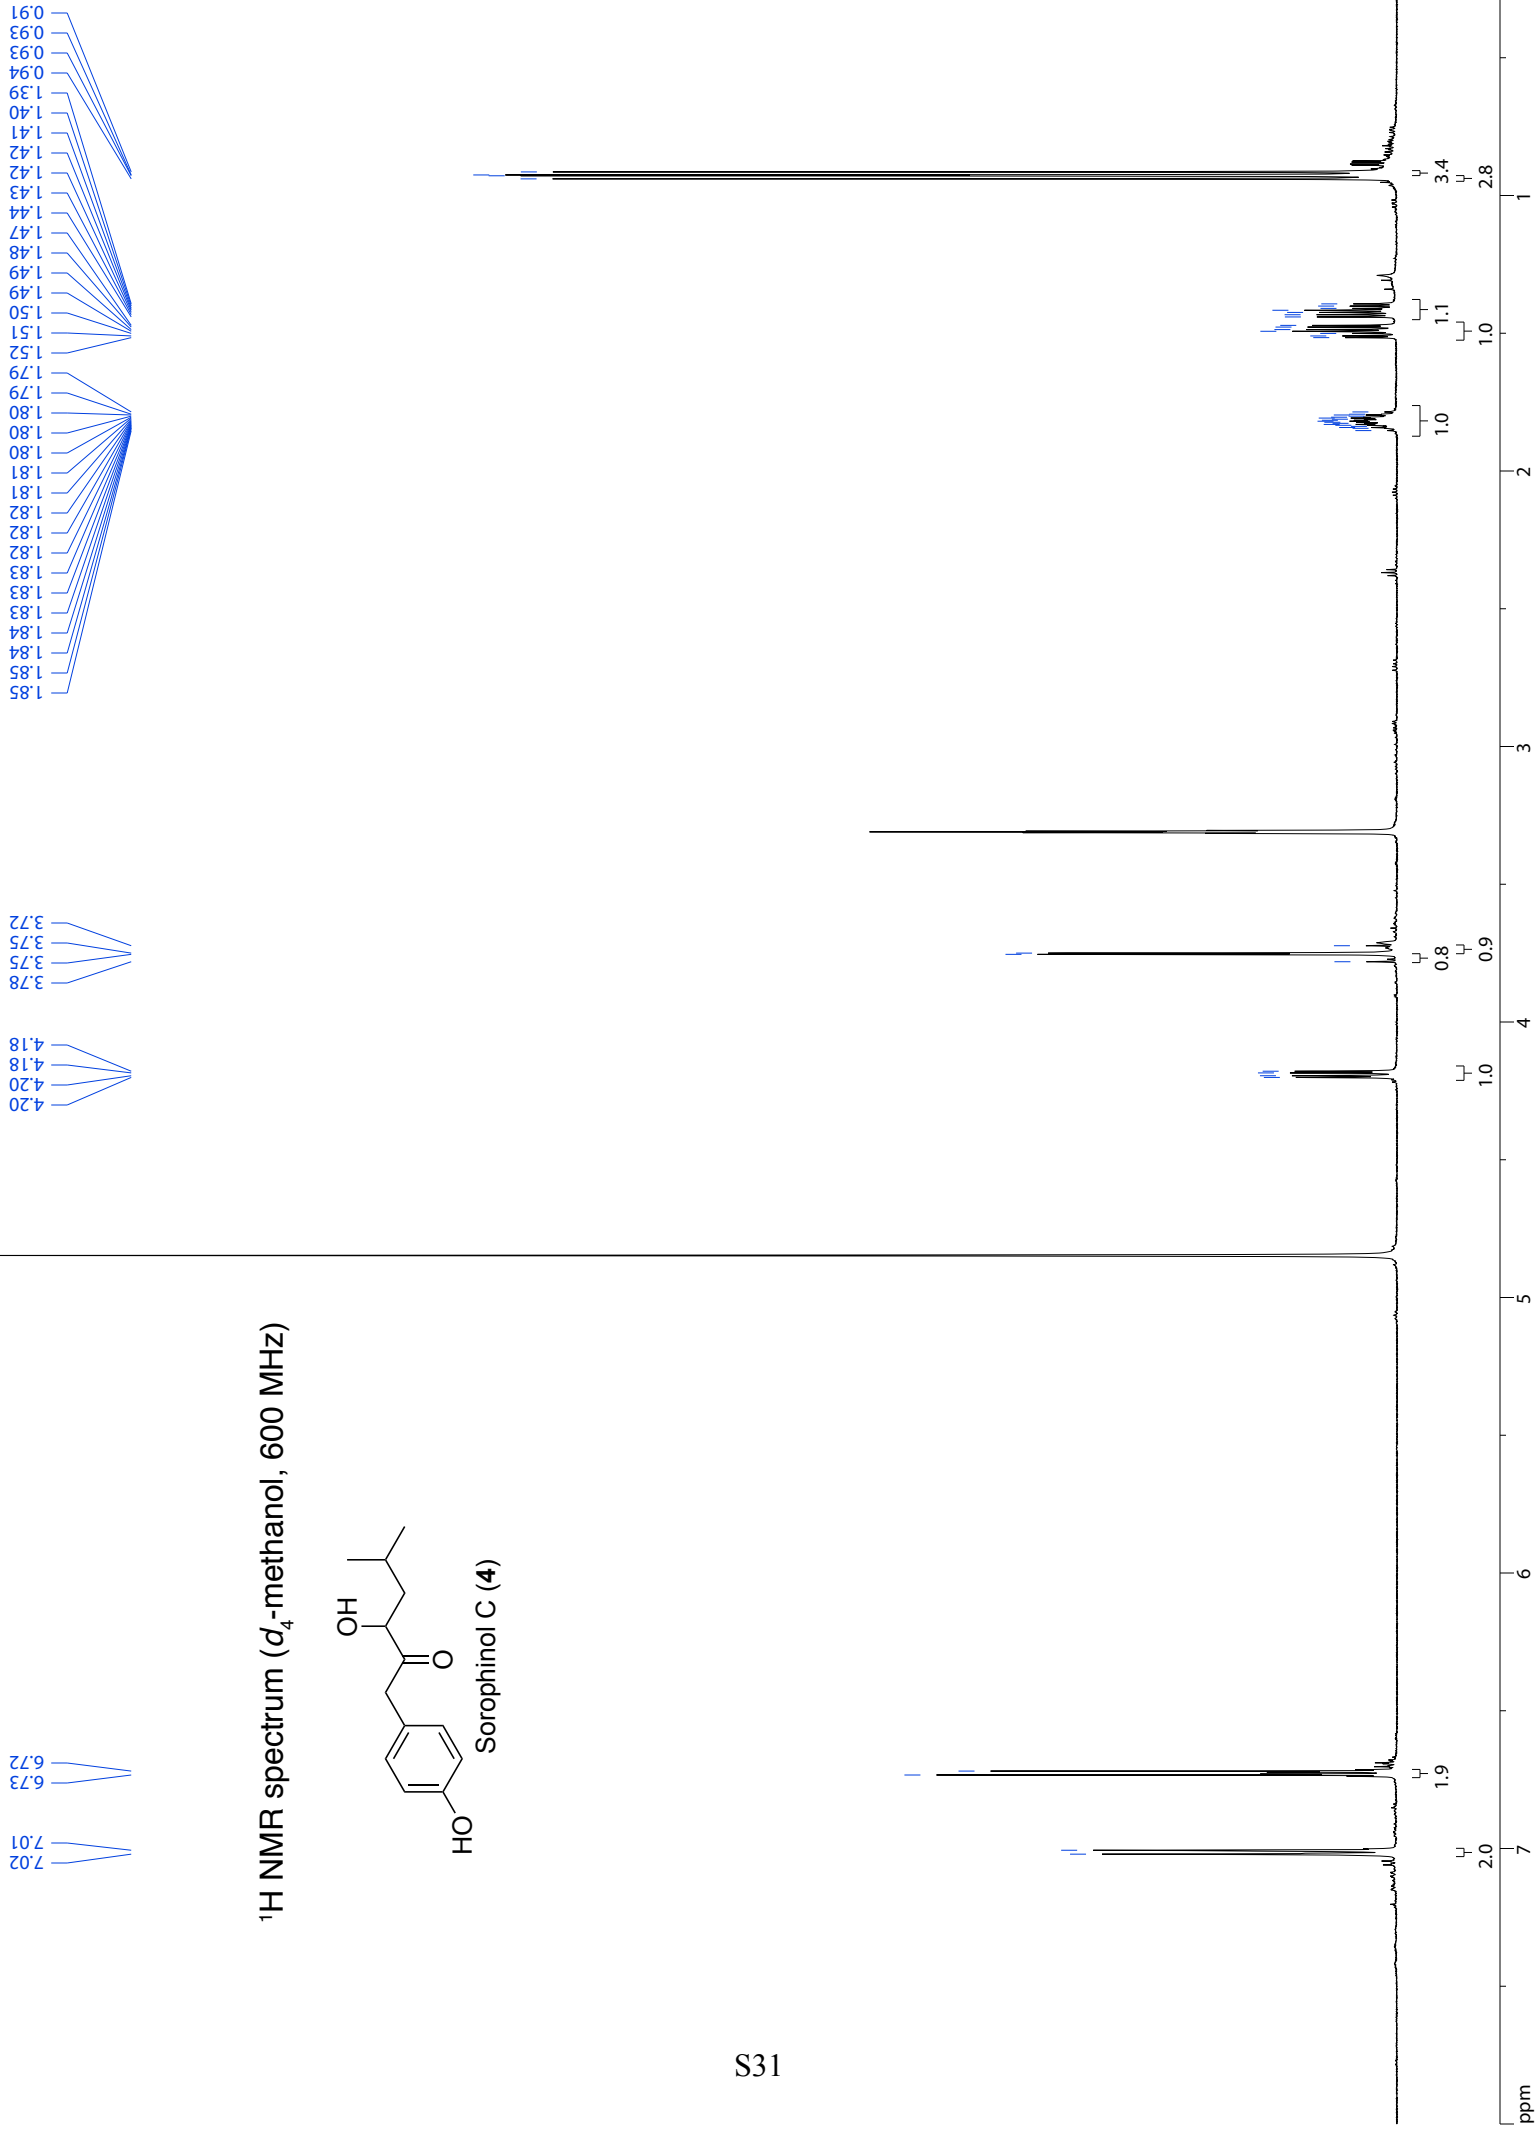

<sup>13</sup>C NMR spectrum (d<sub>4</sub>-methanol, 150 MHz)

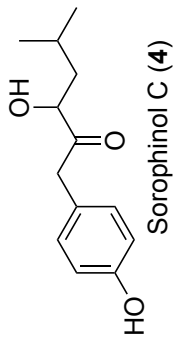

25.6  
23.8  
21.7

43.5  
44.9

76.0

116.3

126.2  
131.7

157.4

213.5

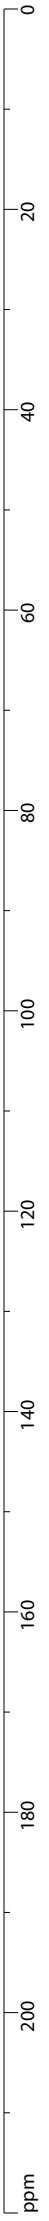



<sup>1</sup>H NMR spectrum (CDCl<sub>3</sub>, 400 MHz)

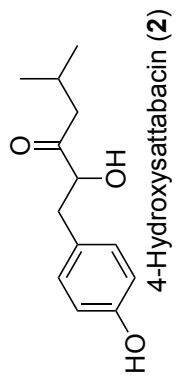

7.08  
6.73

3.09  
3.08  
3.05  
3.04  
2.79  
2.77  
2.75  
2.73  
2.38  
2.36  
2.23  
2.21  
2.20  
2.18  
2.16  
2.15  
2.13

3.47

4.34

5.13

7.10  
6.75

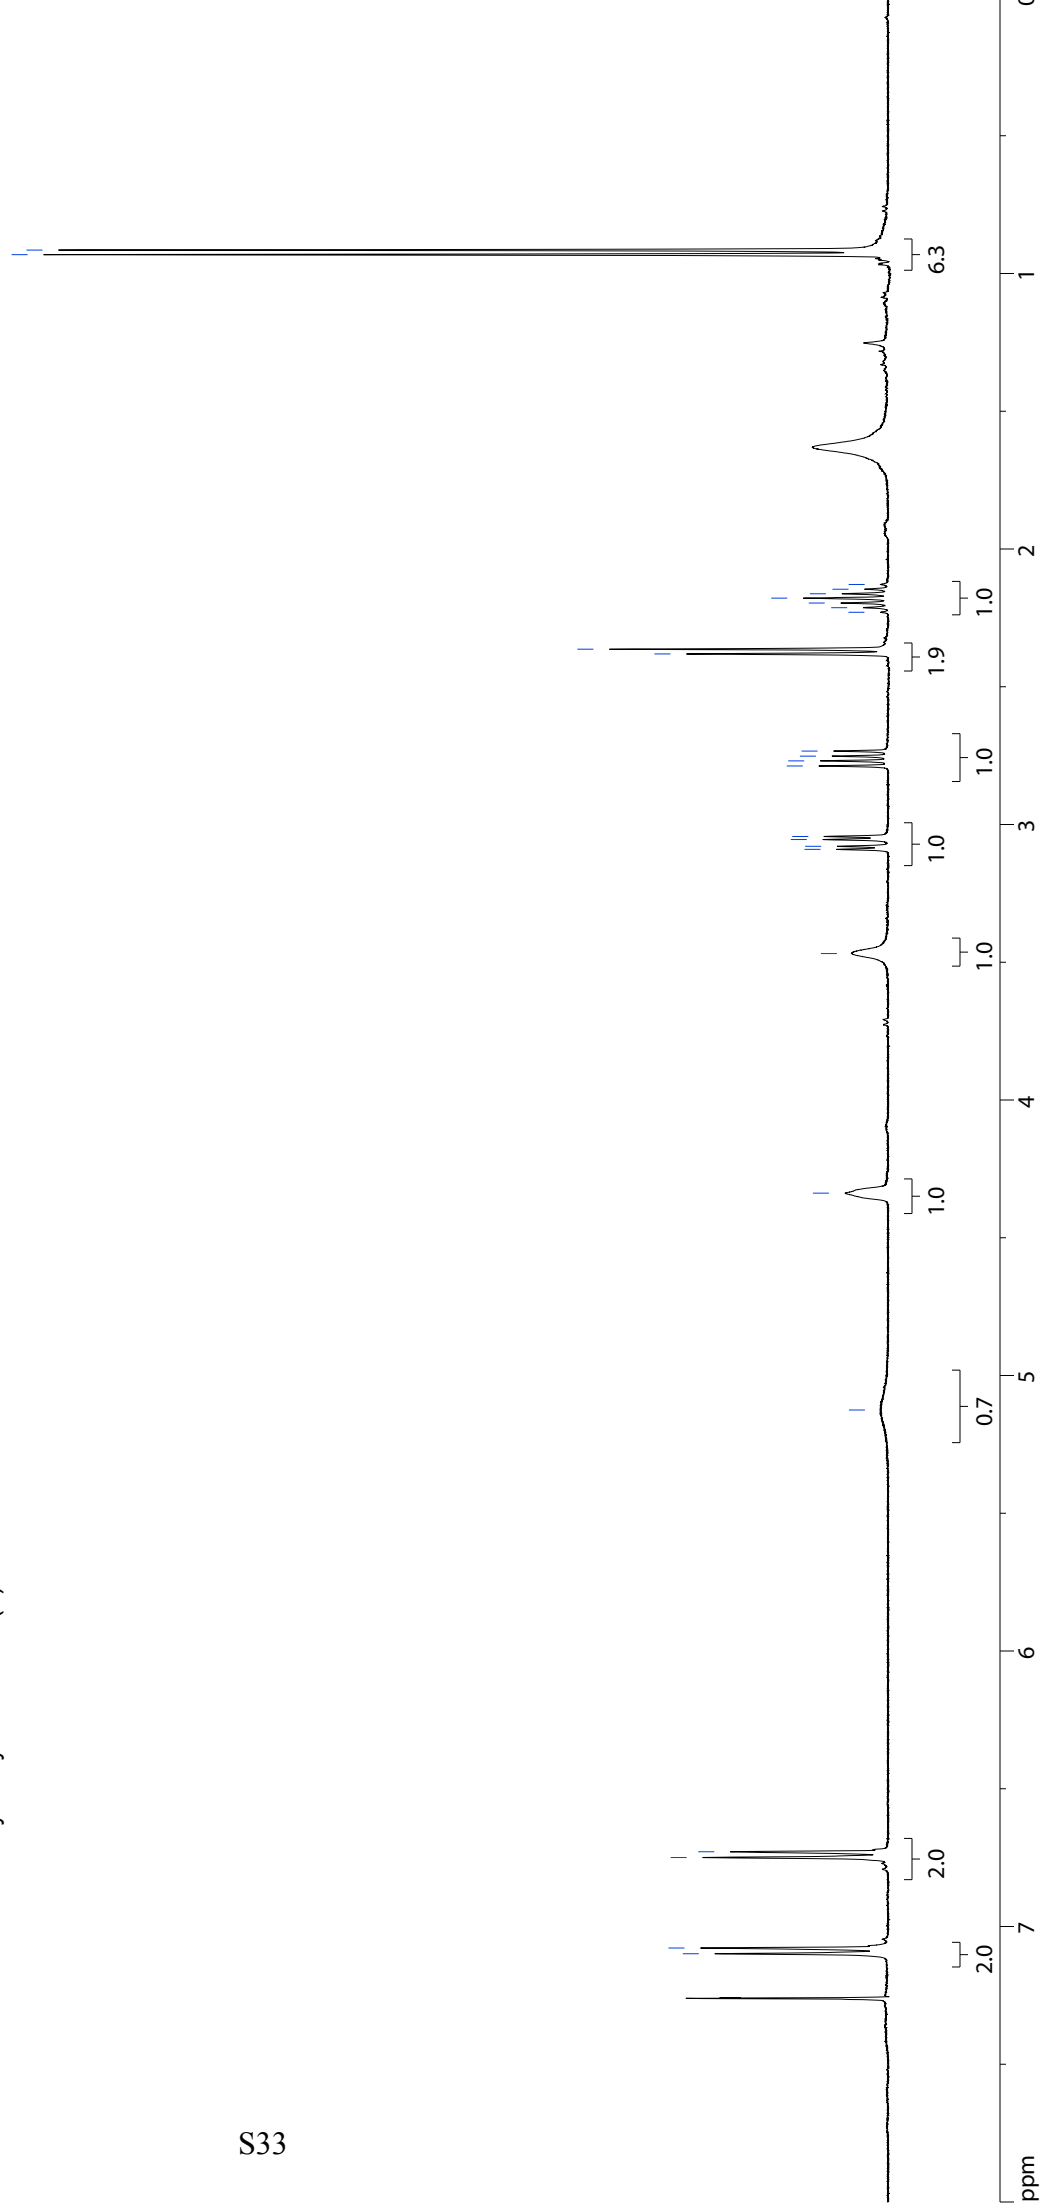

<sup>13</sup>C NMR spectrum (CDCl<sub>3</sub>, 126 MHz)

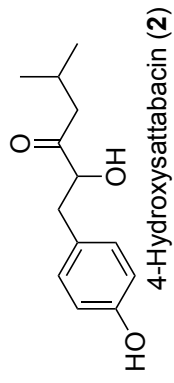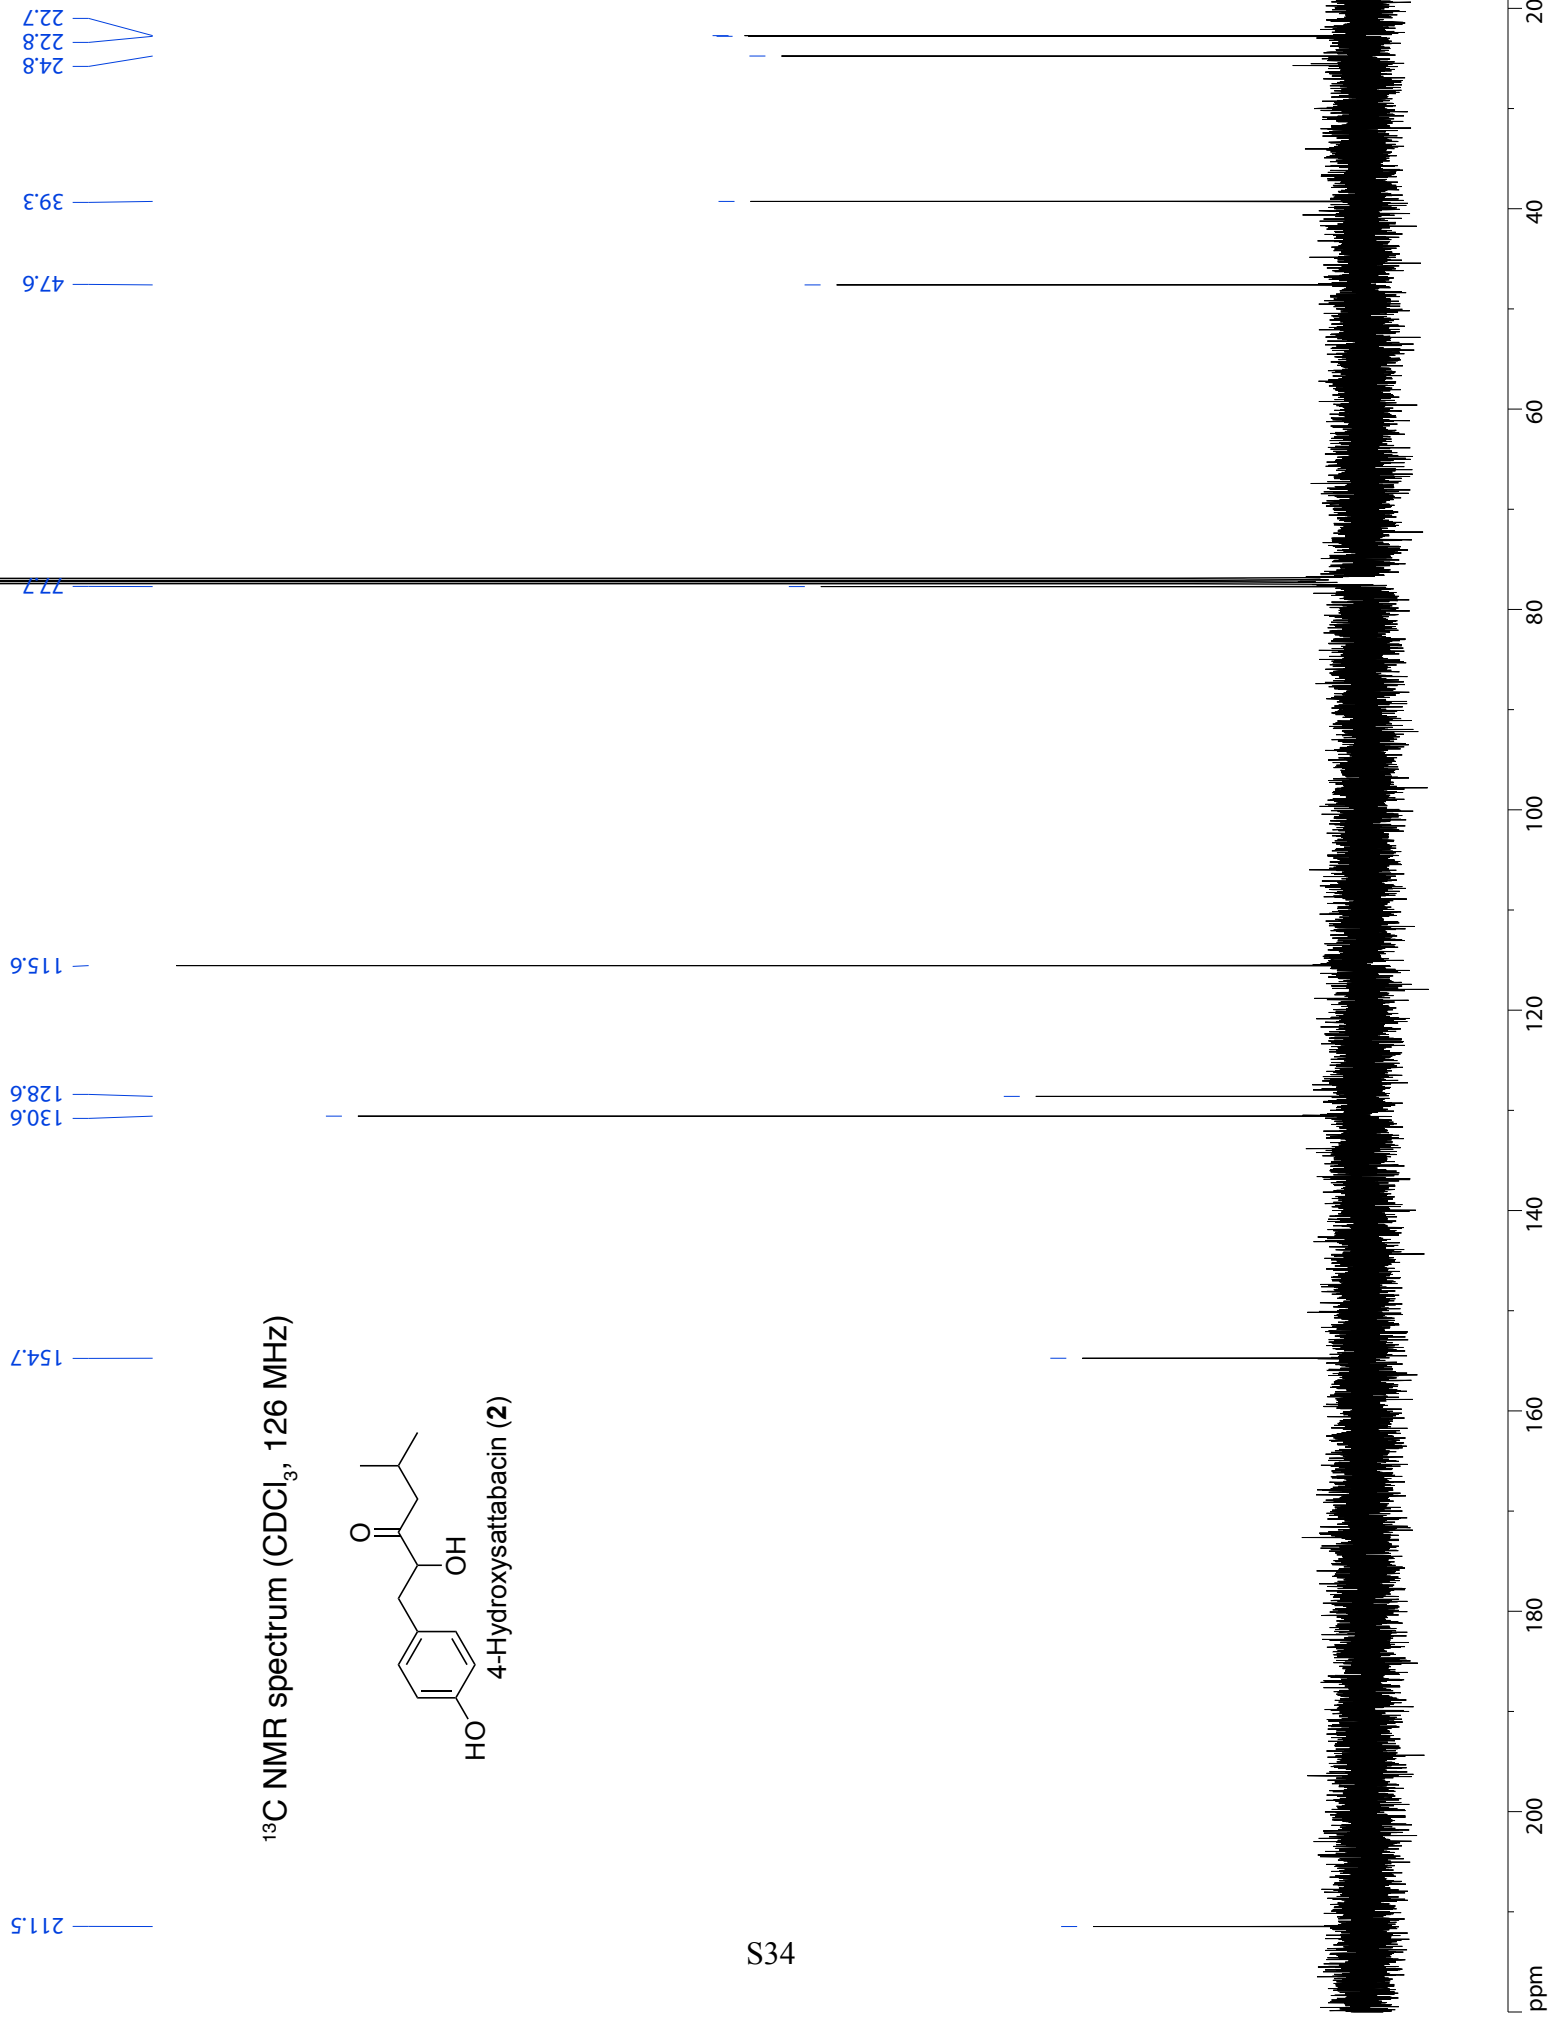



<sup>13</sup>C NMR spectrum (CDCl<sub>3</sub>, 101 MHz)

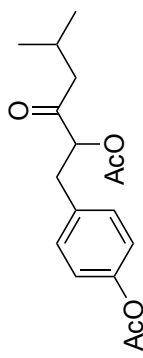

Actinopolymorphol A acetate (**20**)

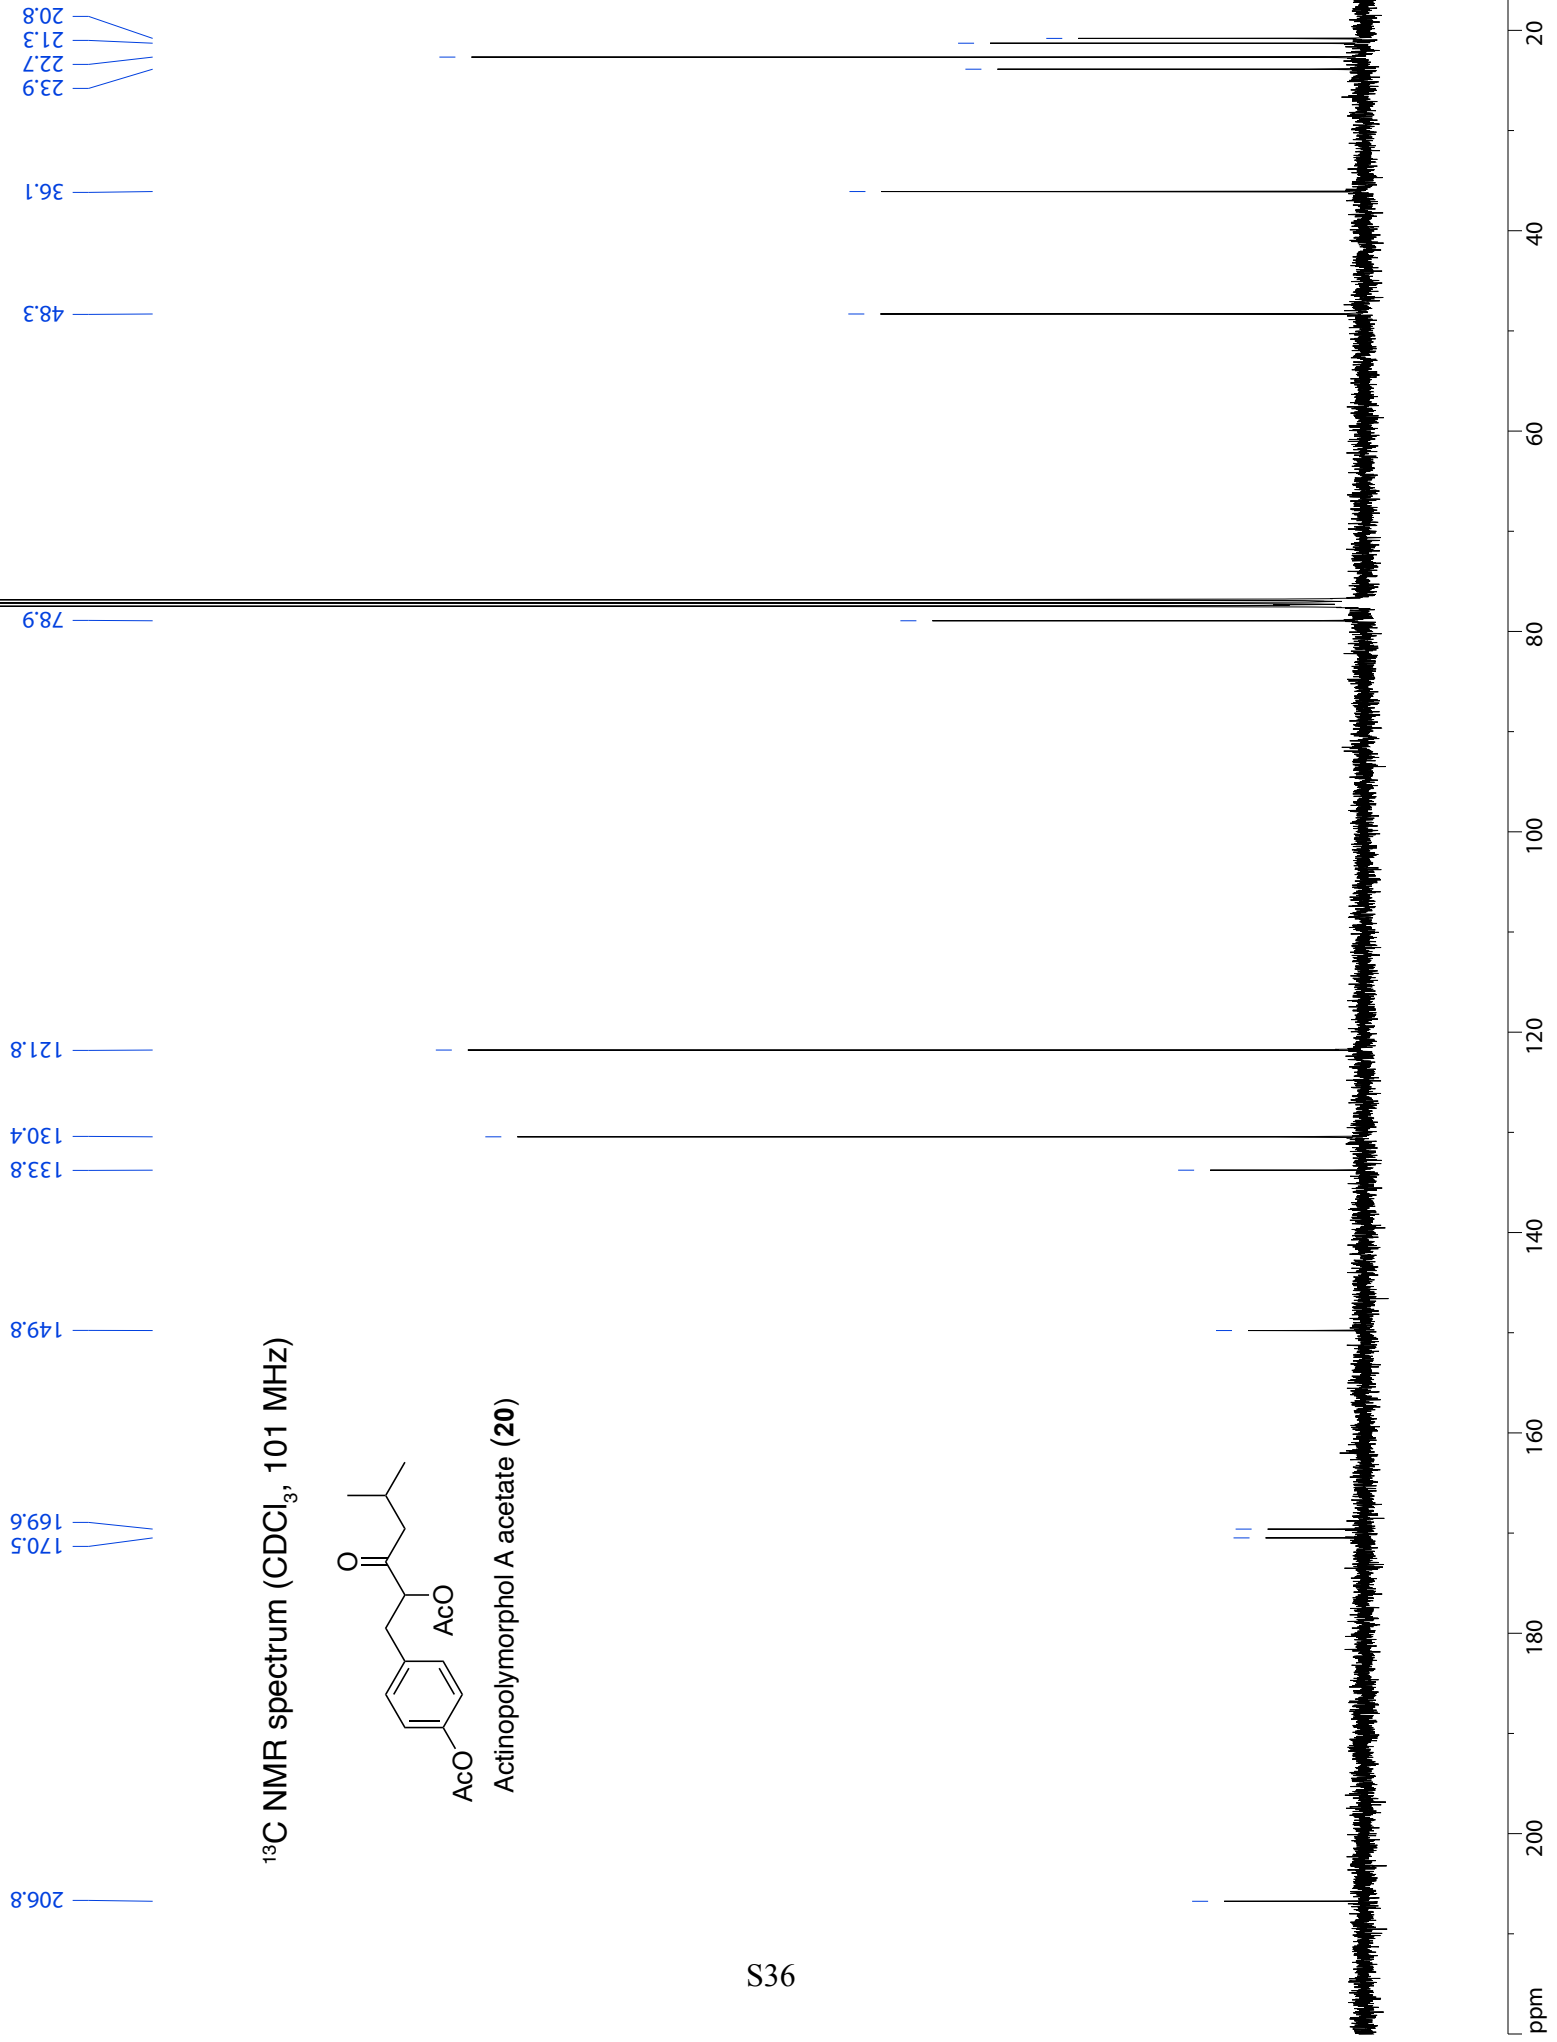

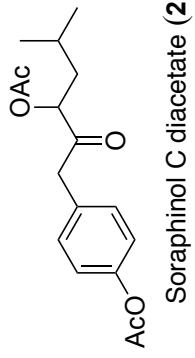

<sup>1</sup>H NMR spectrum (CDCl<sub>3</sub>, 400 MHz)

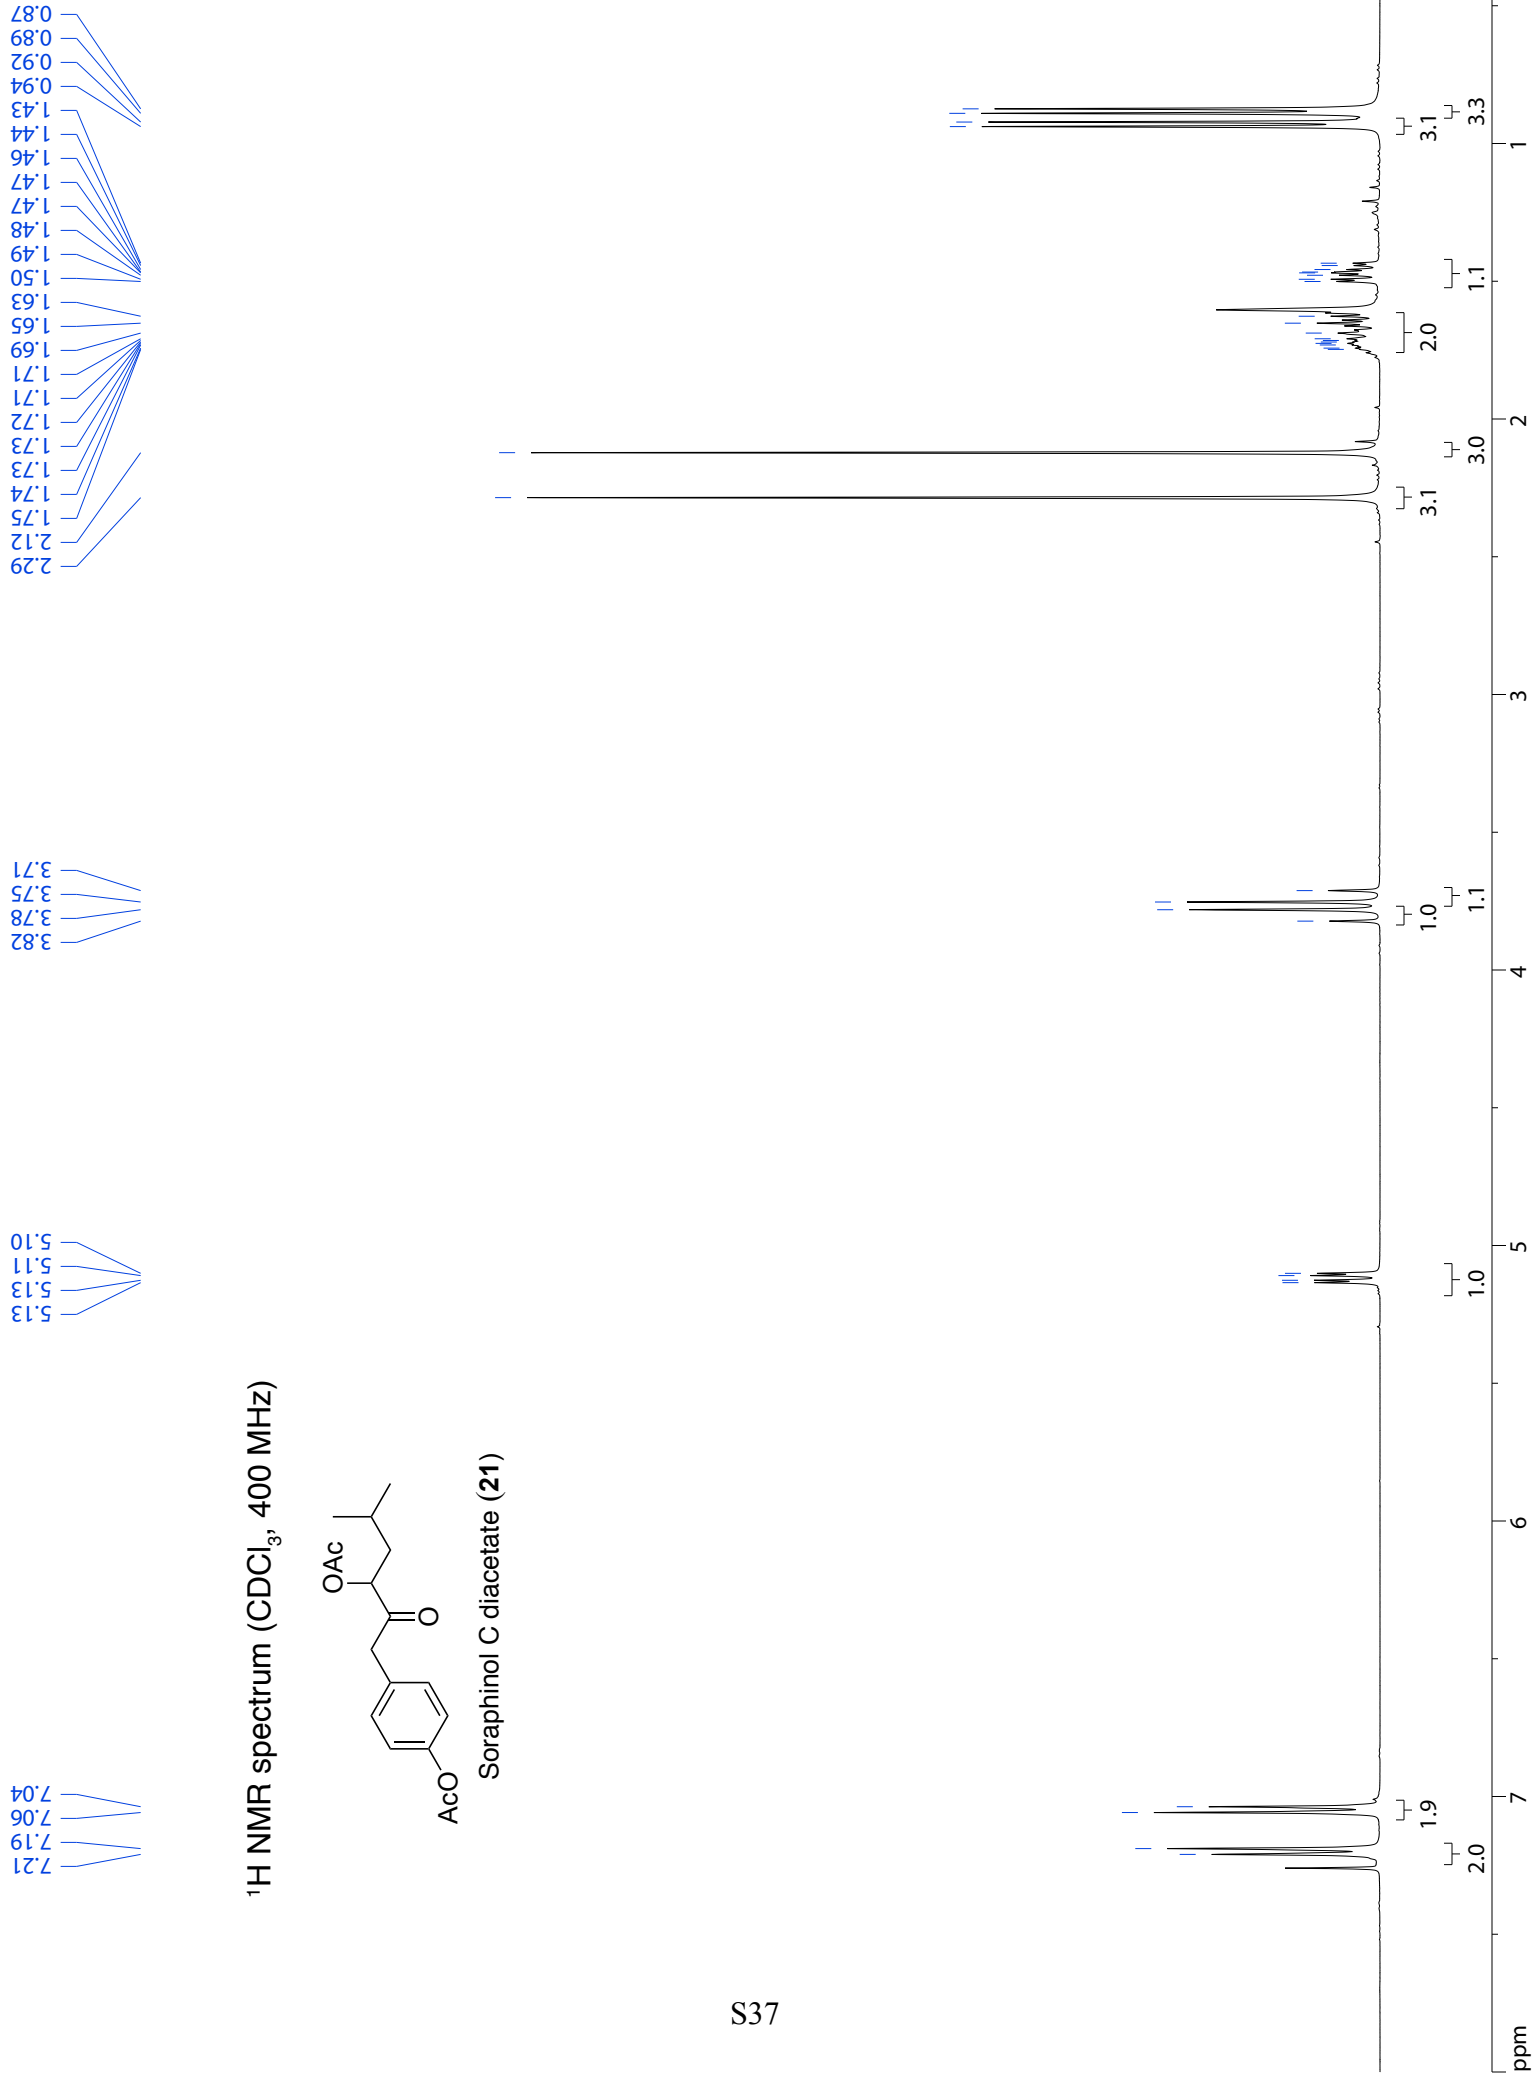

<sup>13</sup>C NMR spectrum (CDCl<sub>3</sub>, 101 MHz)

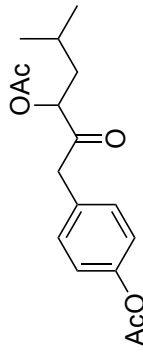

Soraphinol C diacetate (**21**)

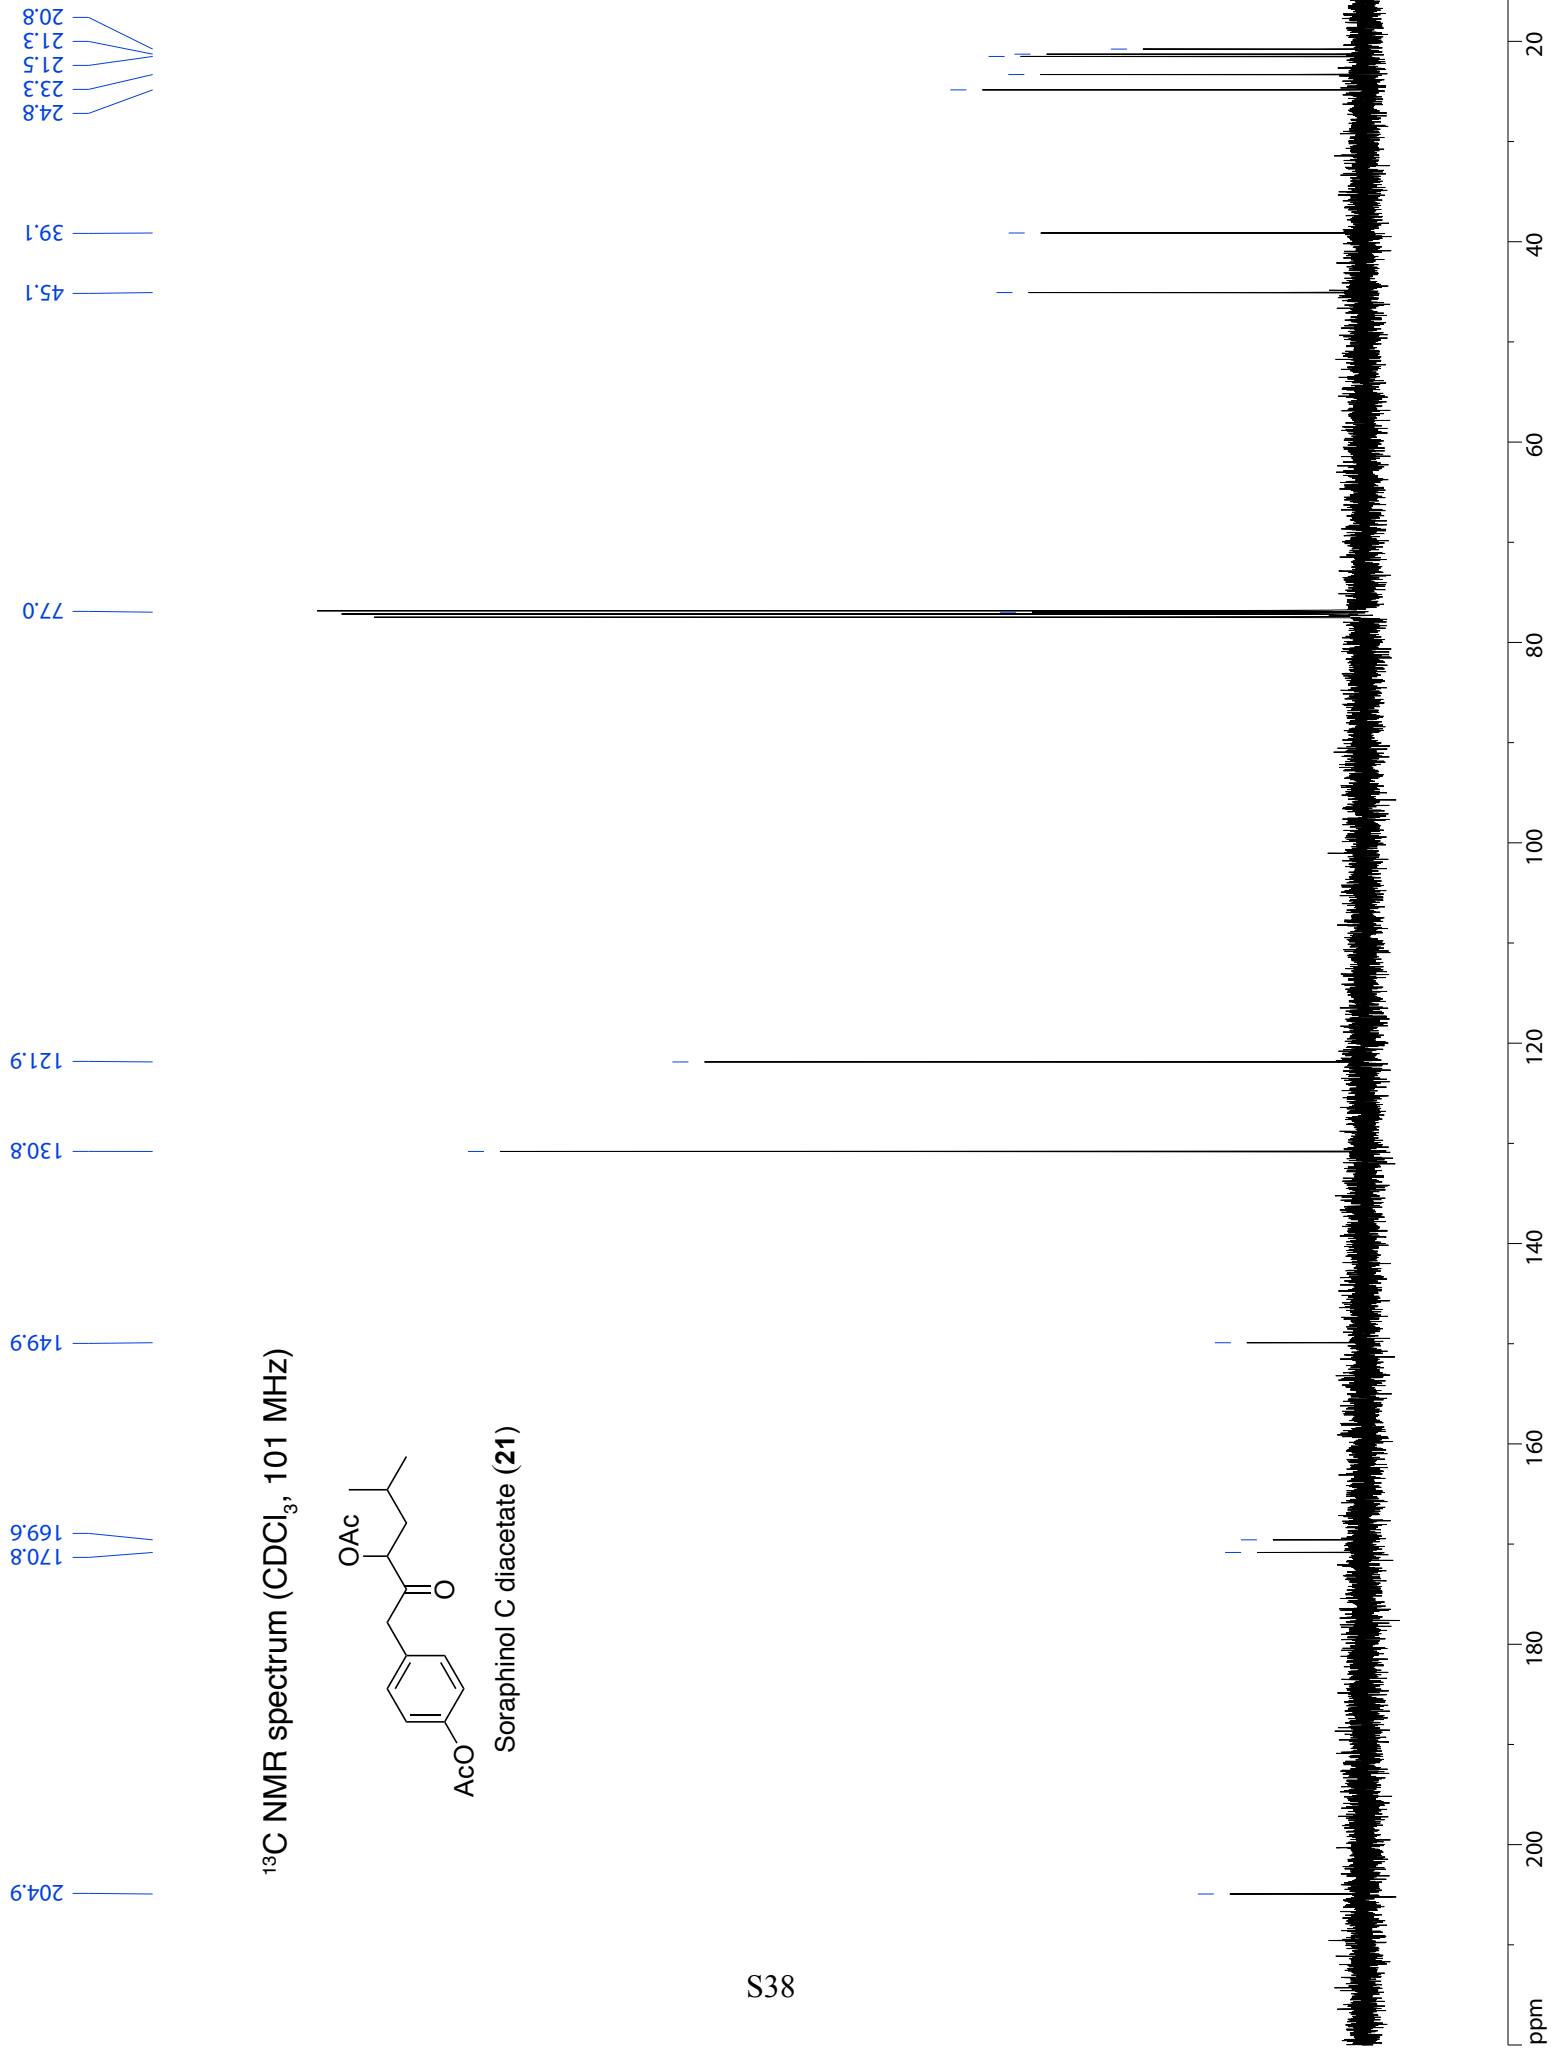

<sup>1</sup>H NMR spectrum (d<sub>4</sub>-methanol, 500 MHz)

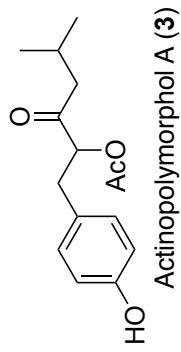

0.88  
0.87  
0.86  
0.85

2.01  
2.02  
2.02  
2.03  
2.05  
2.05  
2.08  
2.09  
2.09  
2.16  
2.18  
2.20  
2.21  
2.35  
2.36  
2.39  
2.40  
2.86  
2.87  
2.89  
2.90  
2.99  
3.00  
3.02  
3.03

5.10  
5.11  
5.12  
5.13

6.72  
6.70

7.04  
7.06

ppm

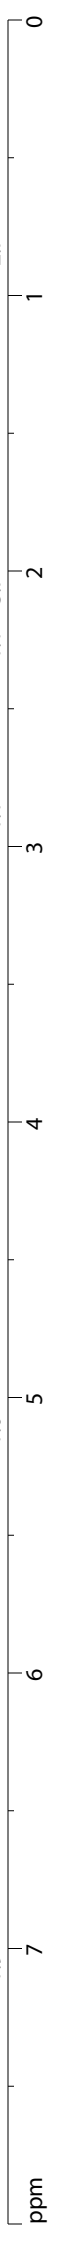

<sup>13</sup>C NMR spectrum (d<sub>4</sub>-methanol, 126 MHz)

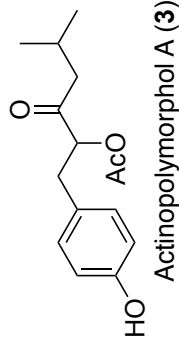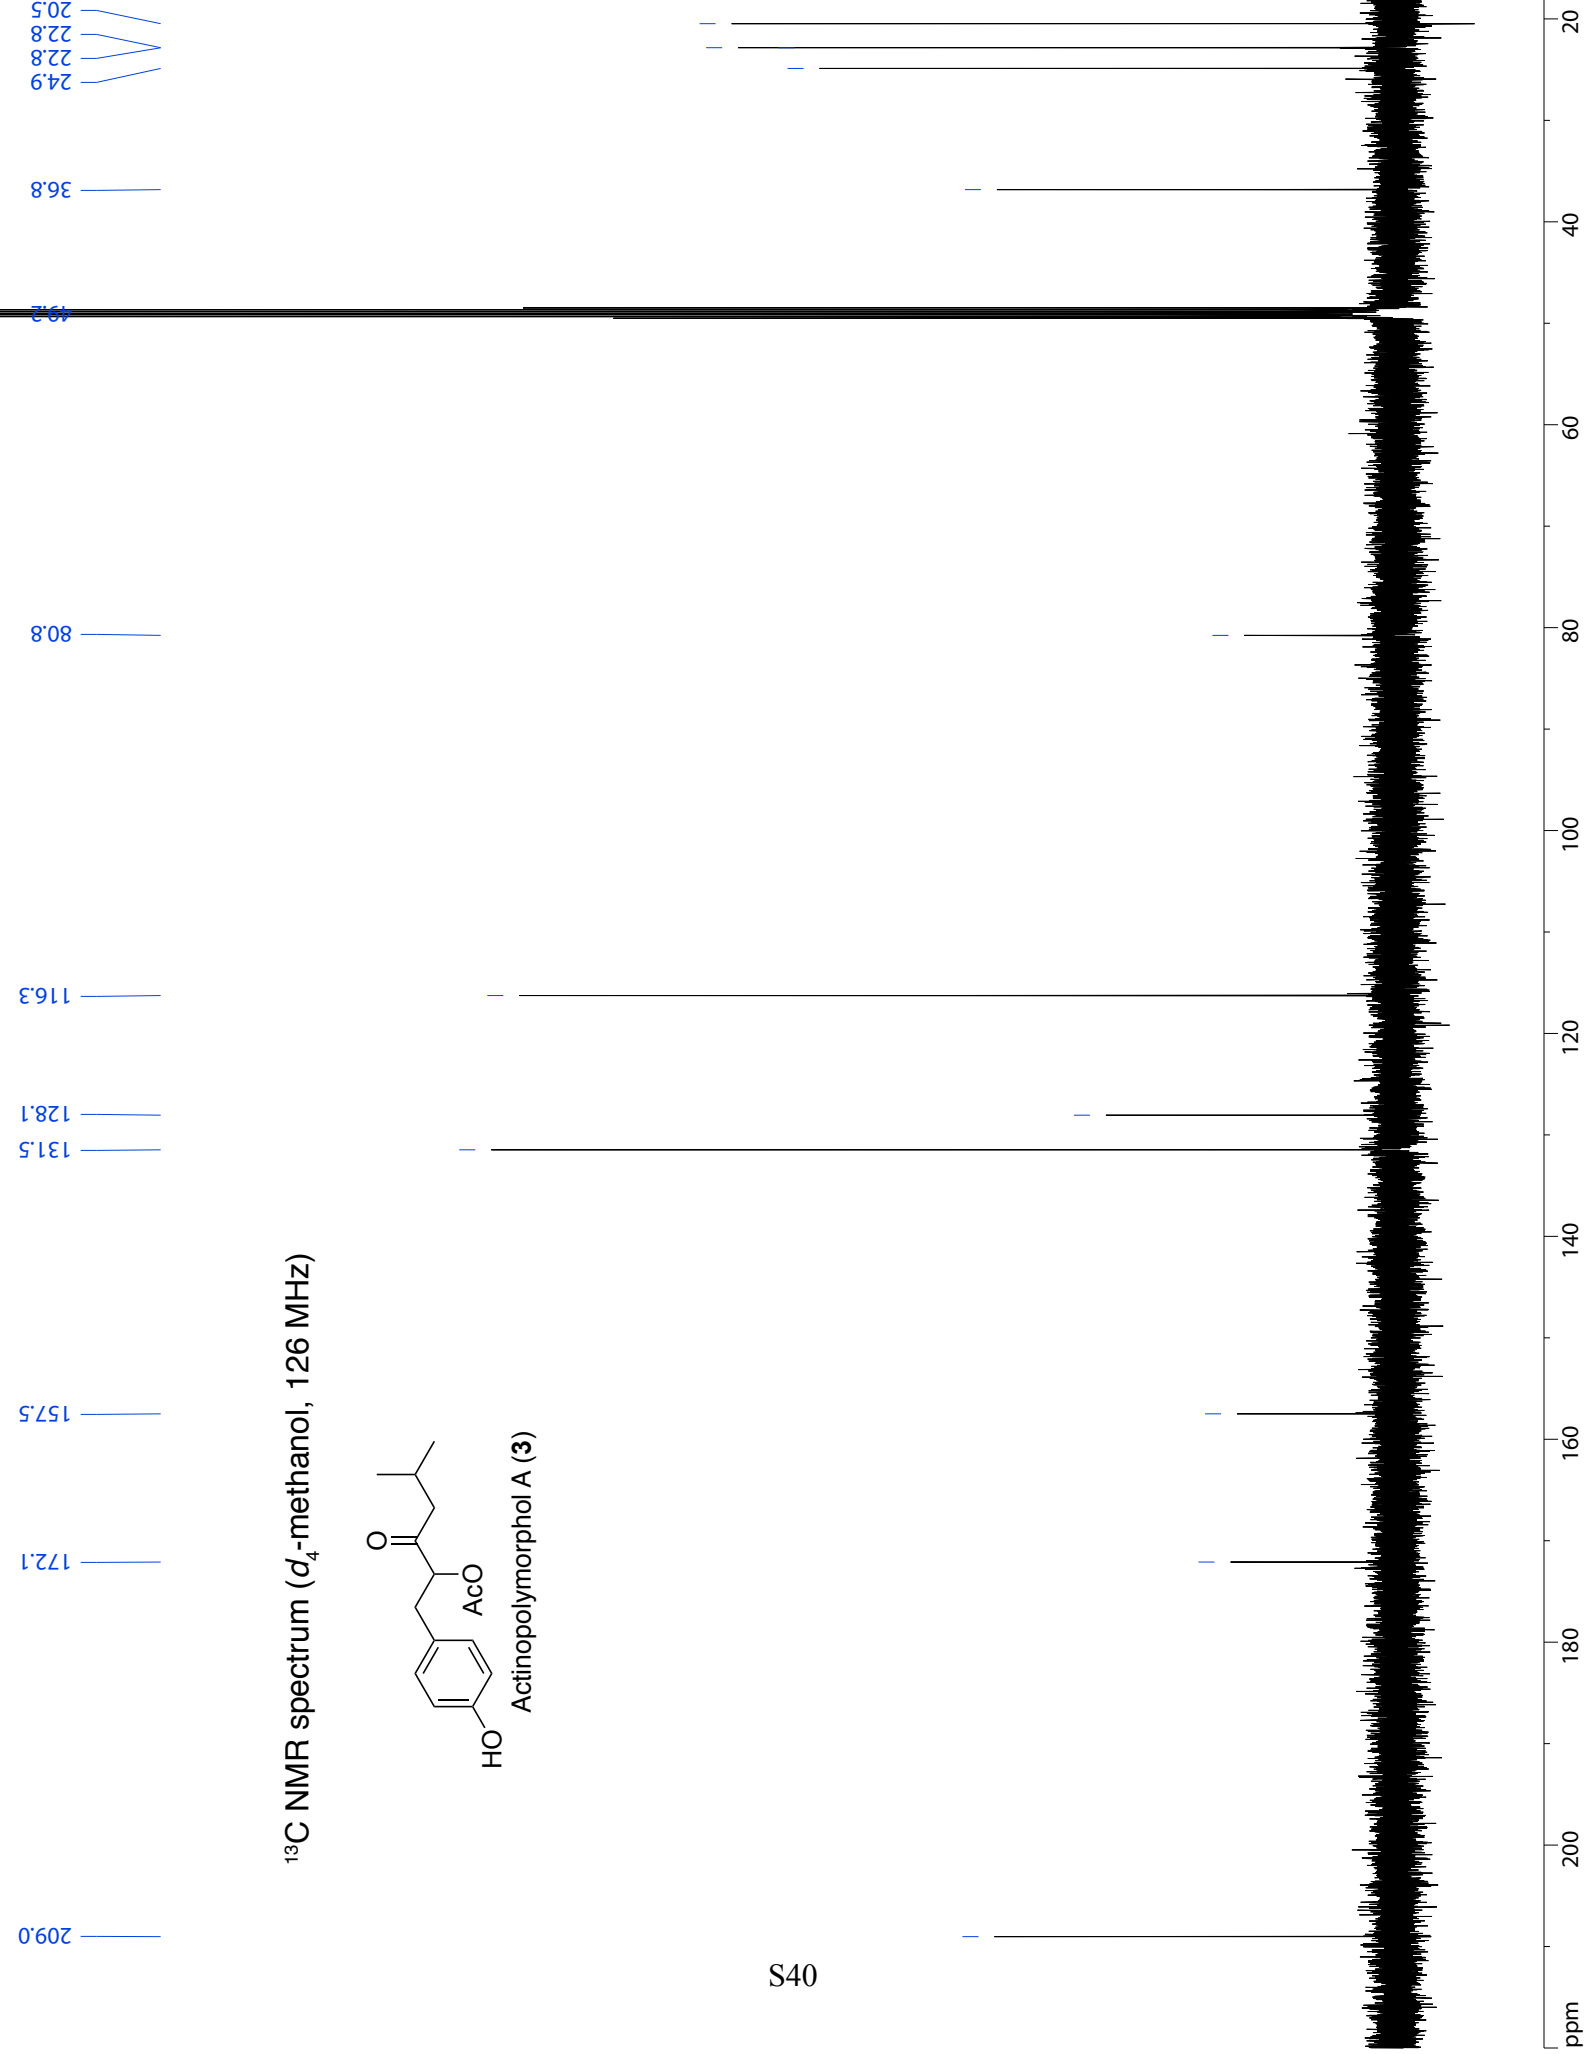



<sup>1</sup>H NMR spectrum (d<sub>4</sub>-methanol, 500 MHz)

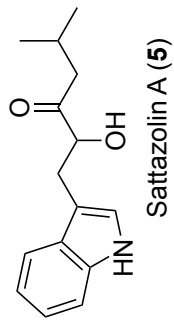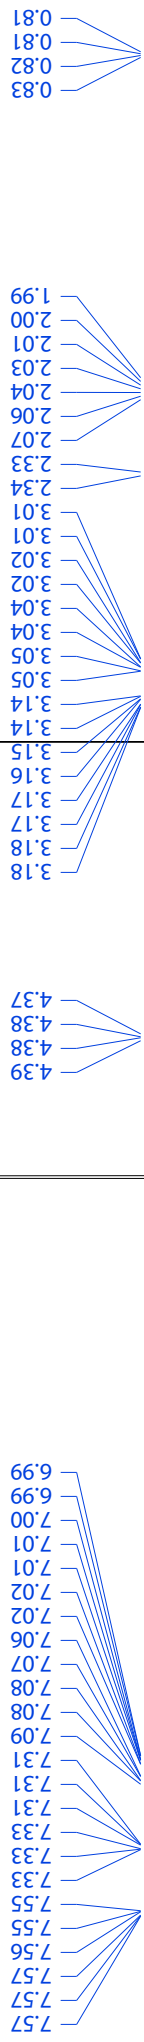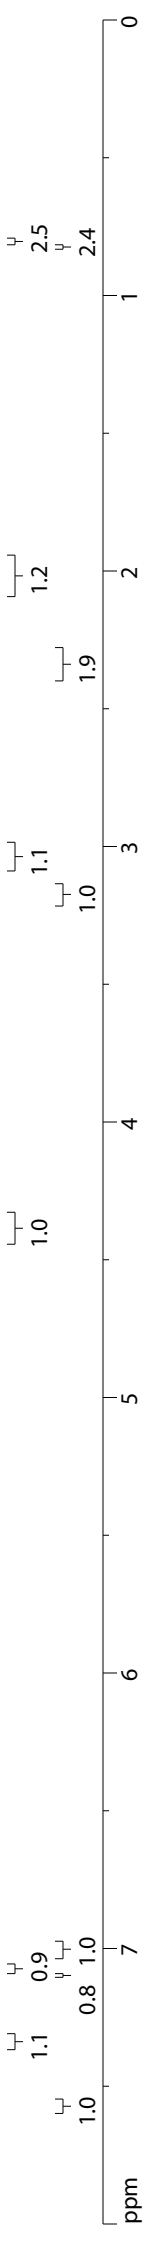

<sup>13</sup>C NMR spectrum (d<sub>4</sub>-methanol, 126 MHz)

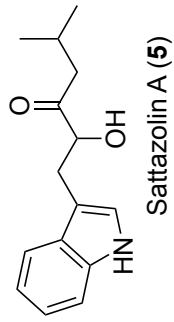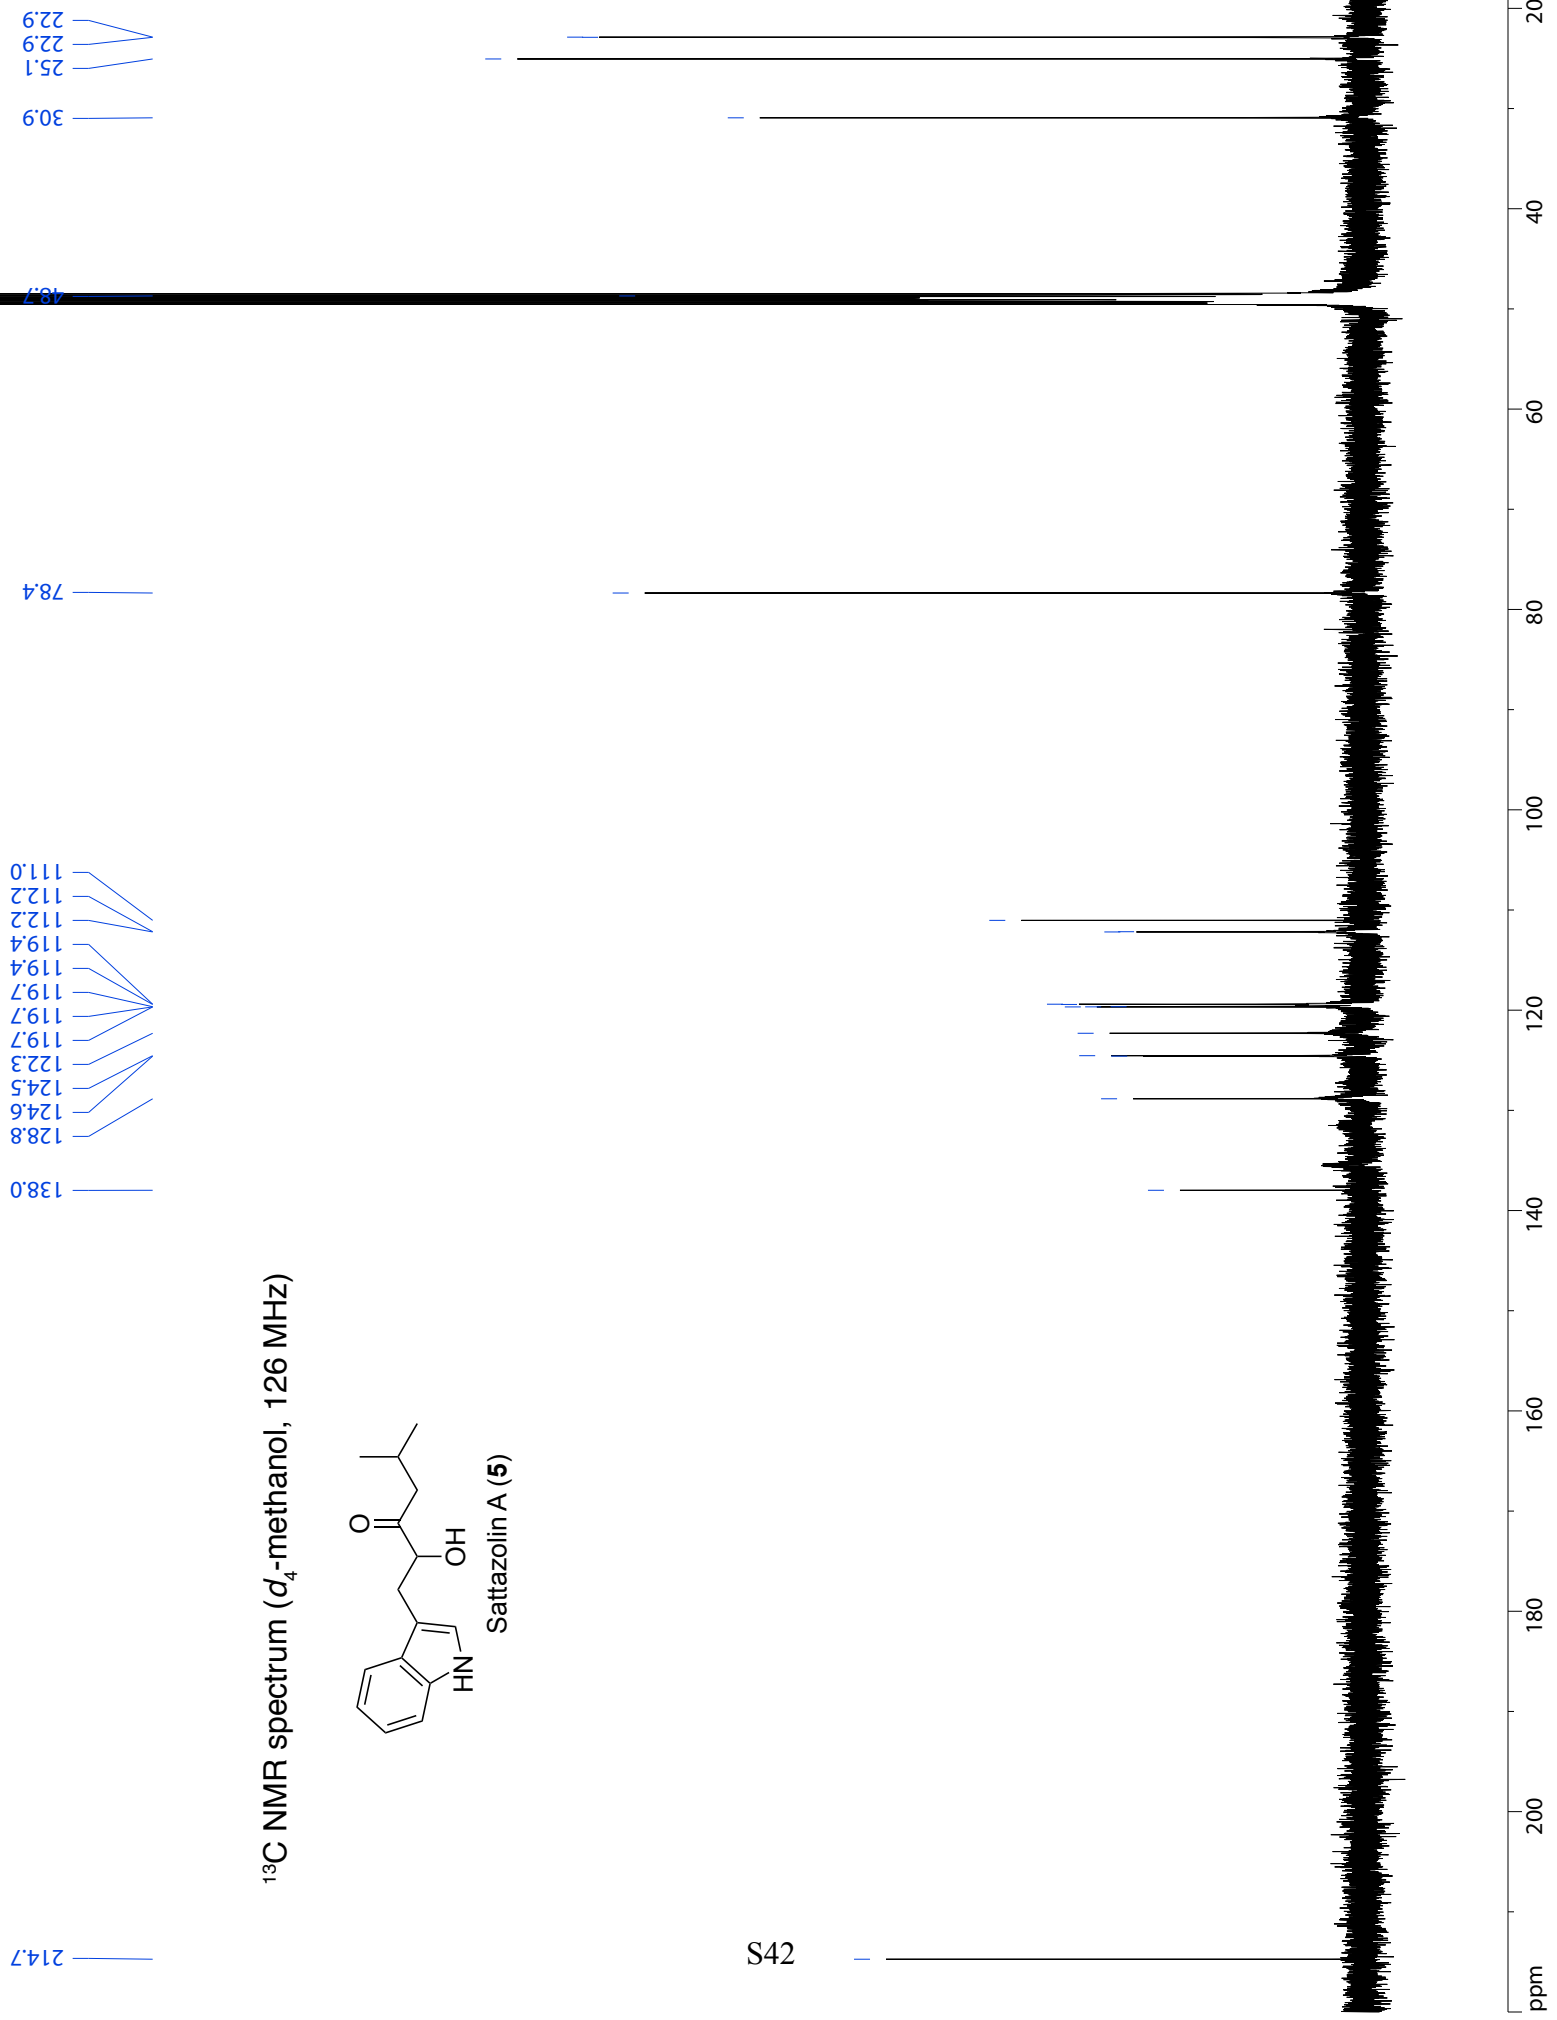

9.21

7.46  
7.45  
7.41  
7.40  
7.16  
7.16  
7.15  
7.14  
7.12  
7.06  
7.06  
7.05  
7.03  
7.03

4.27  
4.26  
4.25  
4.24  
4.24  
3.99  
3.96  
3.95  
3.91  
3.44  
3.43  
1.88  
1.87  
1.86  
1.85  
1.85  
1.84  
1.83  
1.83  
1.82  
1.82  
1.81  
1.81  
1.80  
1.80  
1.79  
1.79  
1.77  
1.64  
1.63  
1.62  
1.61  
1.61  
1.60  
1.59  
1.59  
1.45  
1.44  
1.43  
1.42  
1.41  
1.40  
1.39  
0.94  
0.92  
0.91  
0.90

<sup>1</sup>H NMR spectrum (d<sub>3</sub>-acetonitrile, 500 MHz)

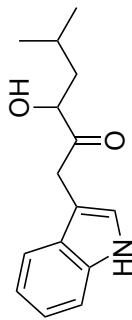

Sattazolin B (**6**)

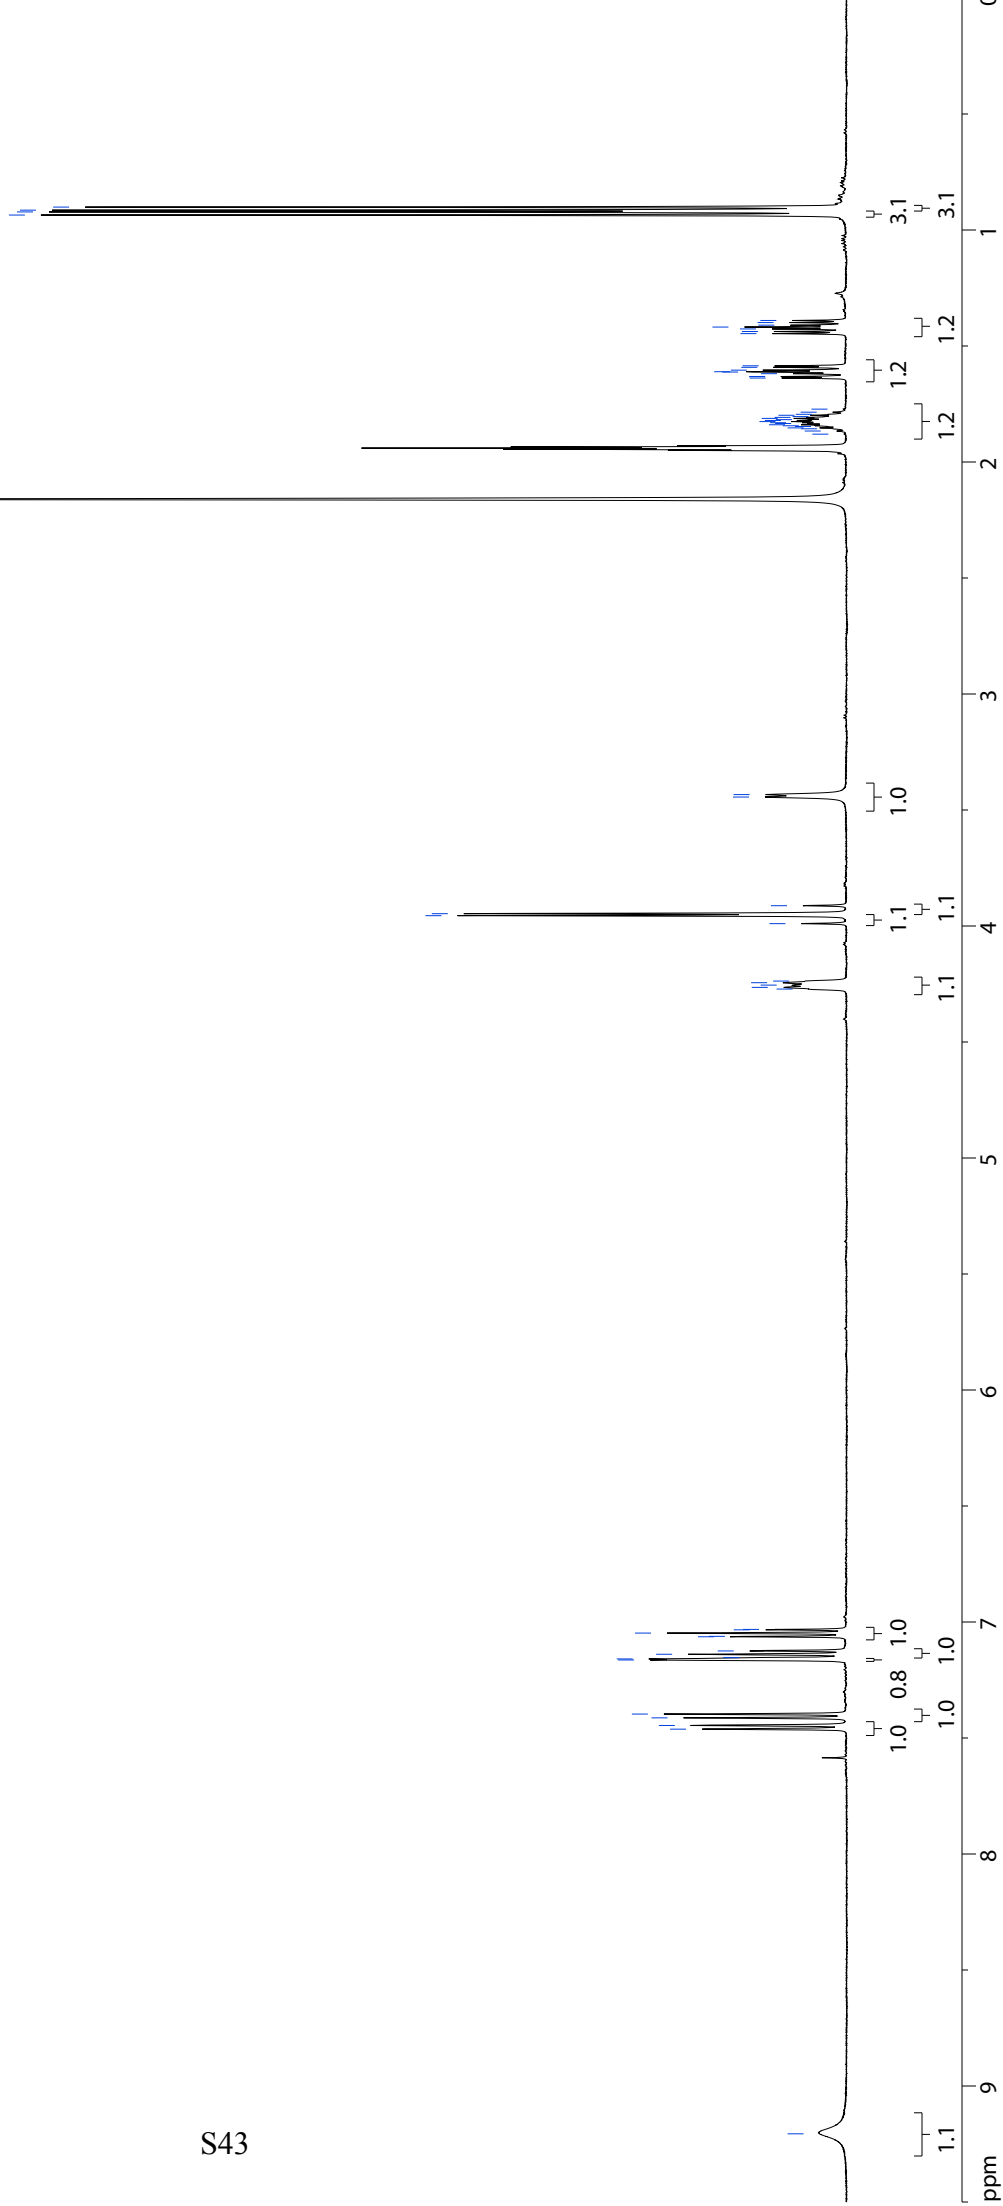

<sup>13</sup>C NMR spectrum (d<sub>3</sub>-acetonitrile, 126 MHz)

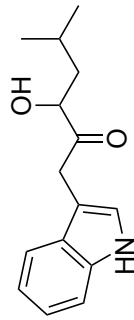

Sattazolin B (**6**)

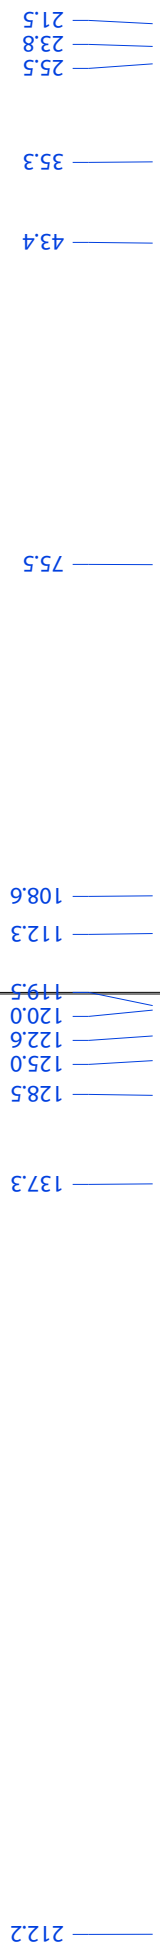

<sup>1</sup>H NMR spectrum (CDCl<sub>3</sub>, 500 MHz)

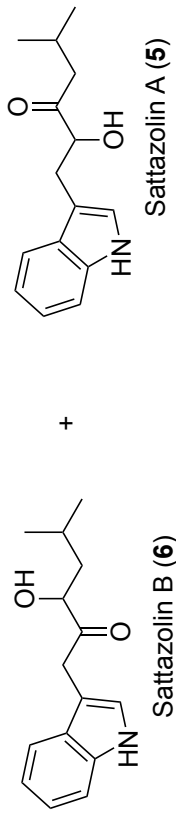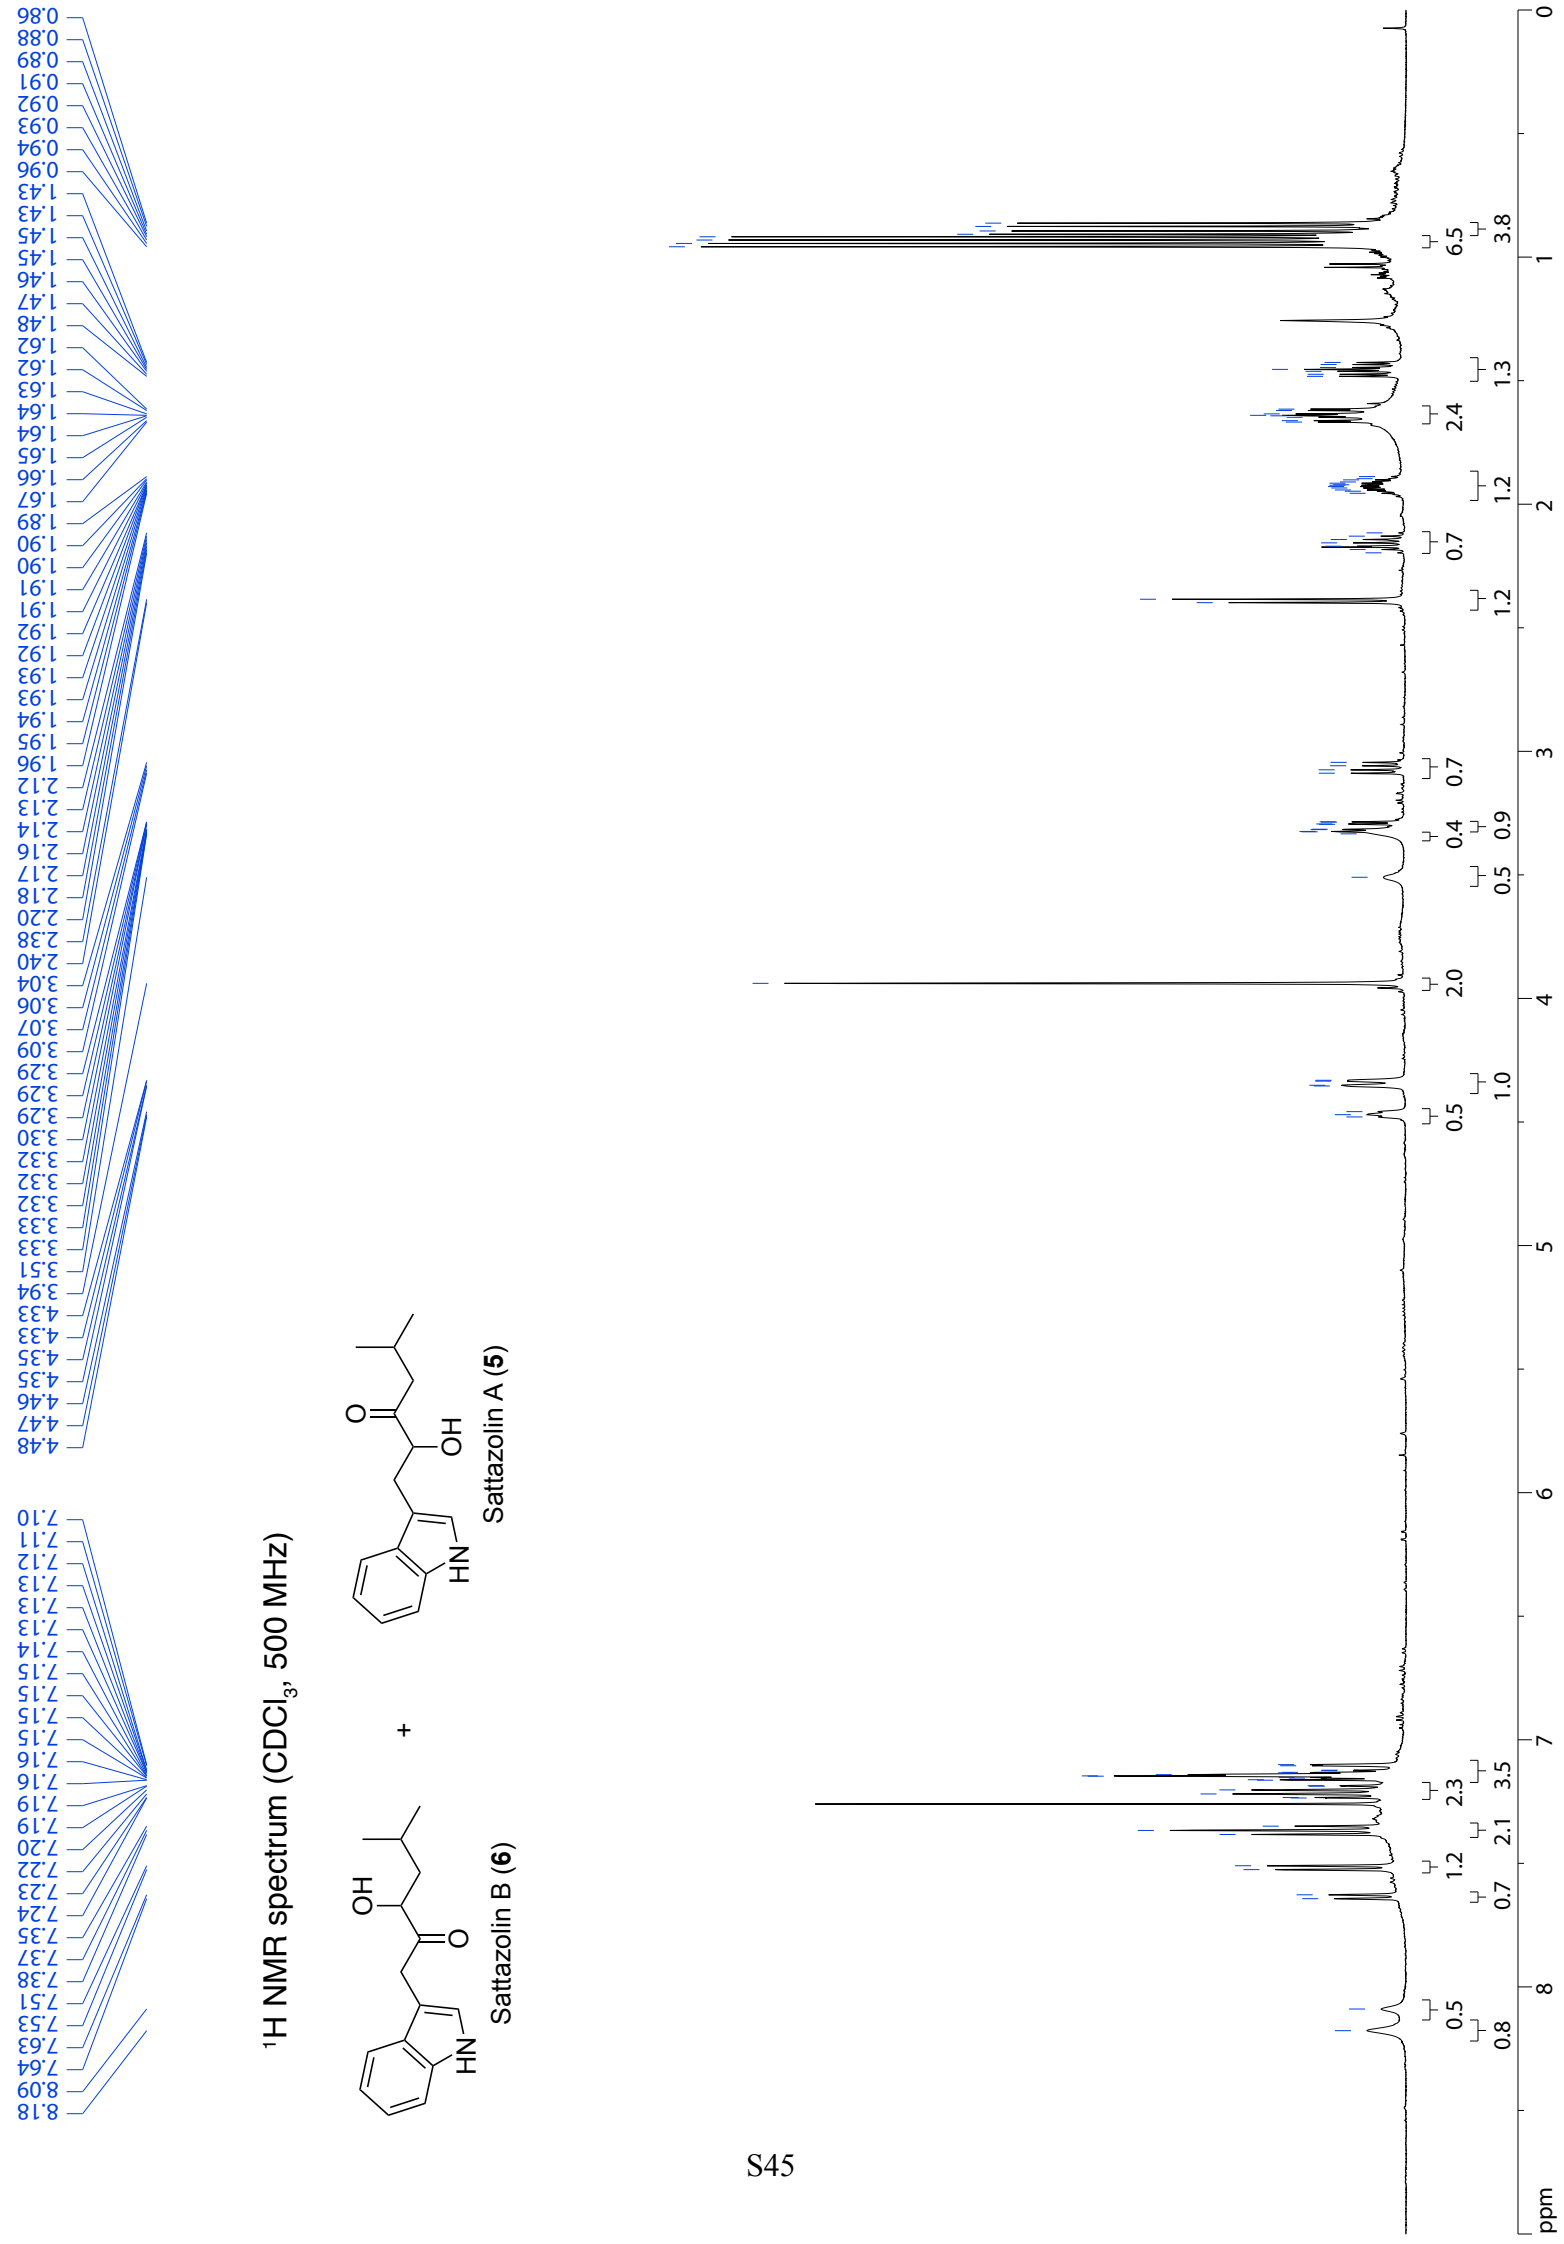

<sup>1</sup>H NMR spectrum (CDCl<sub>3</sub>, 500 MHz)

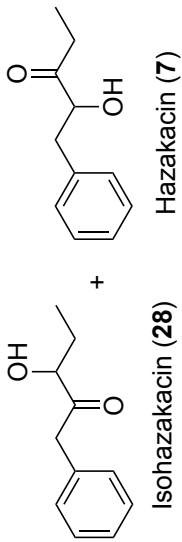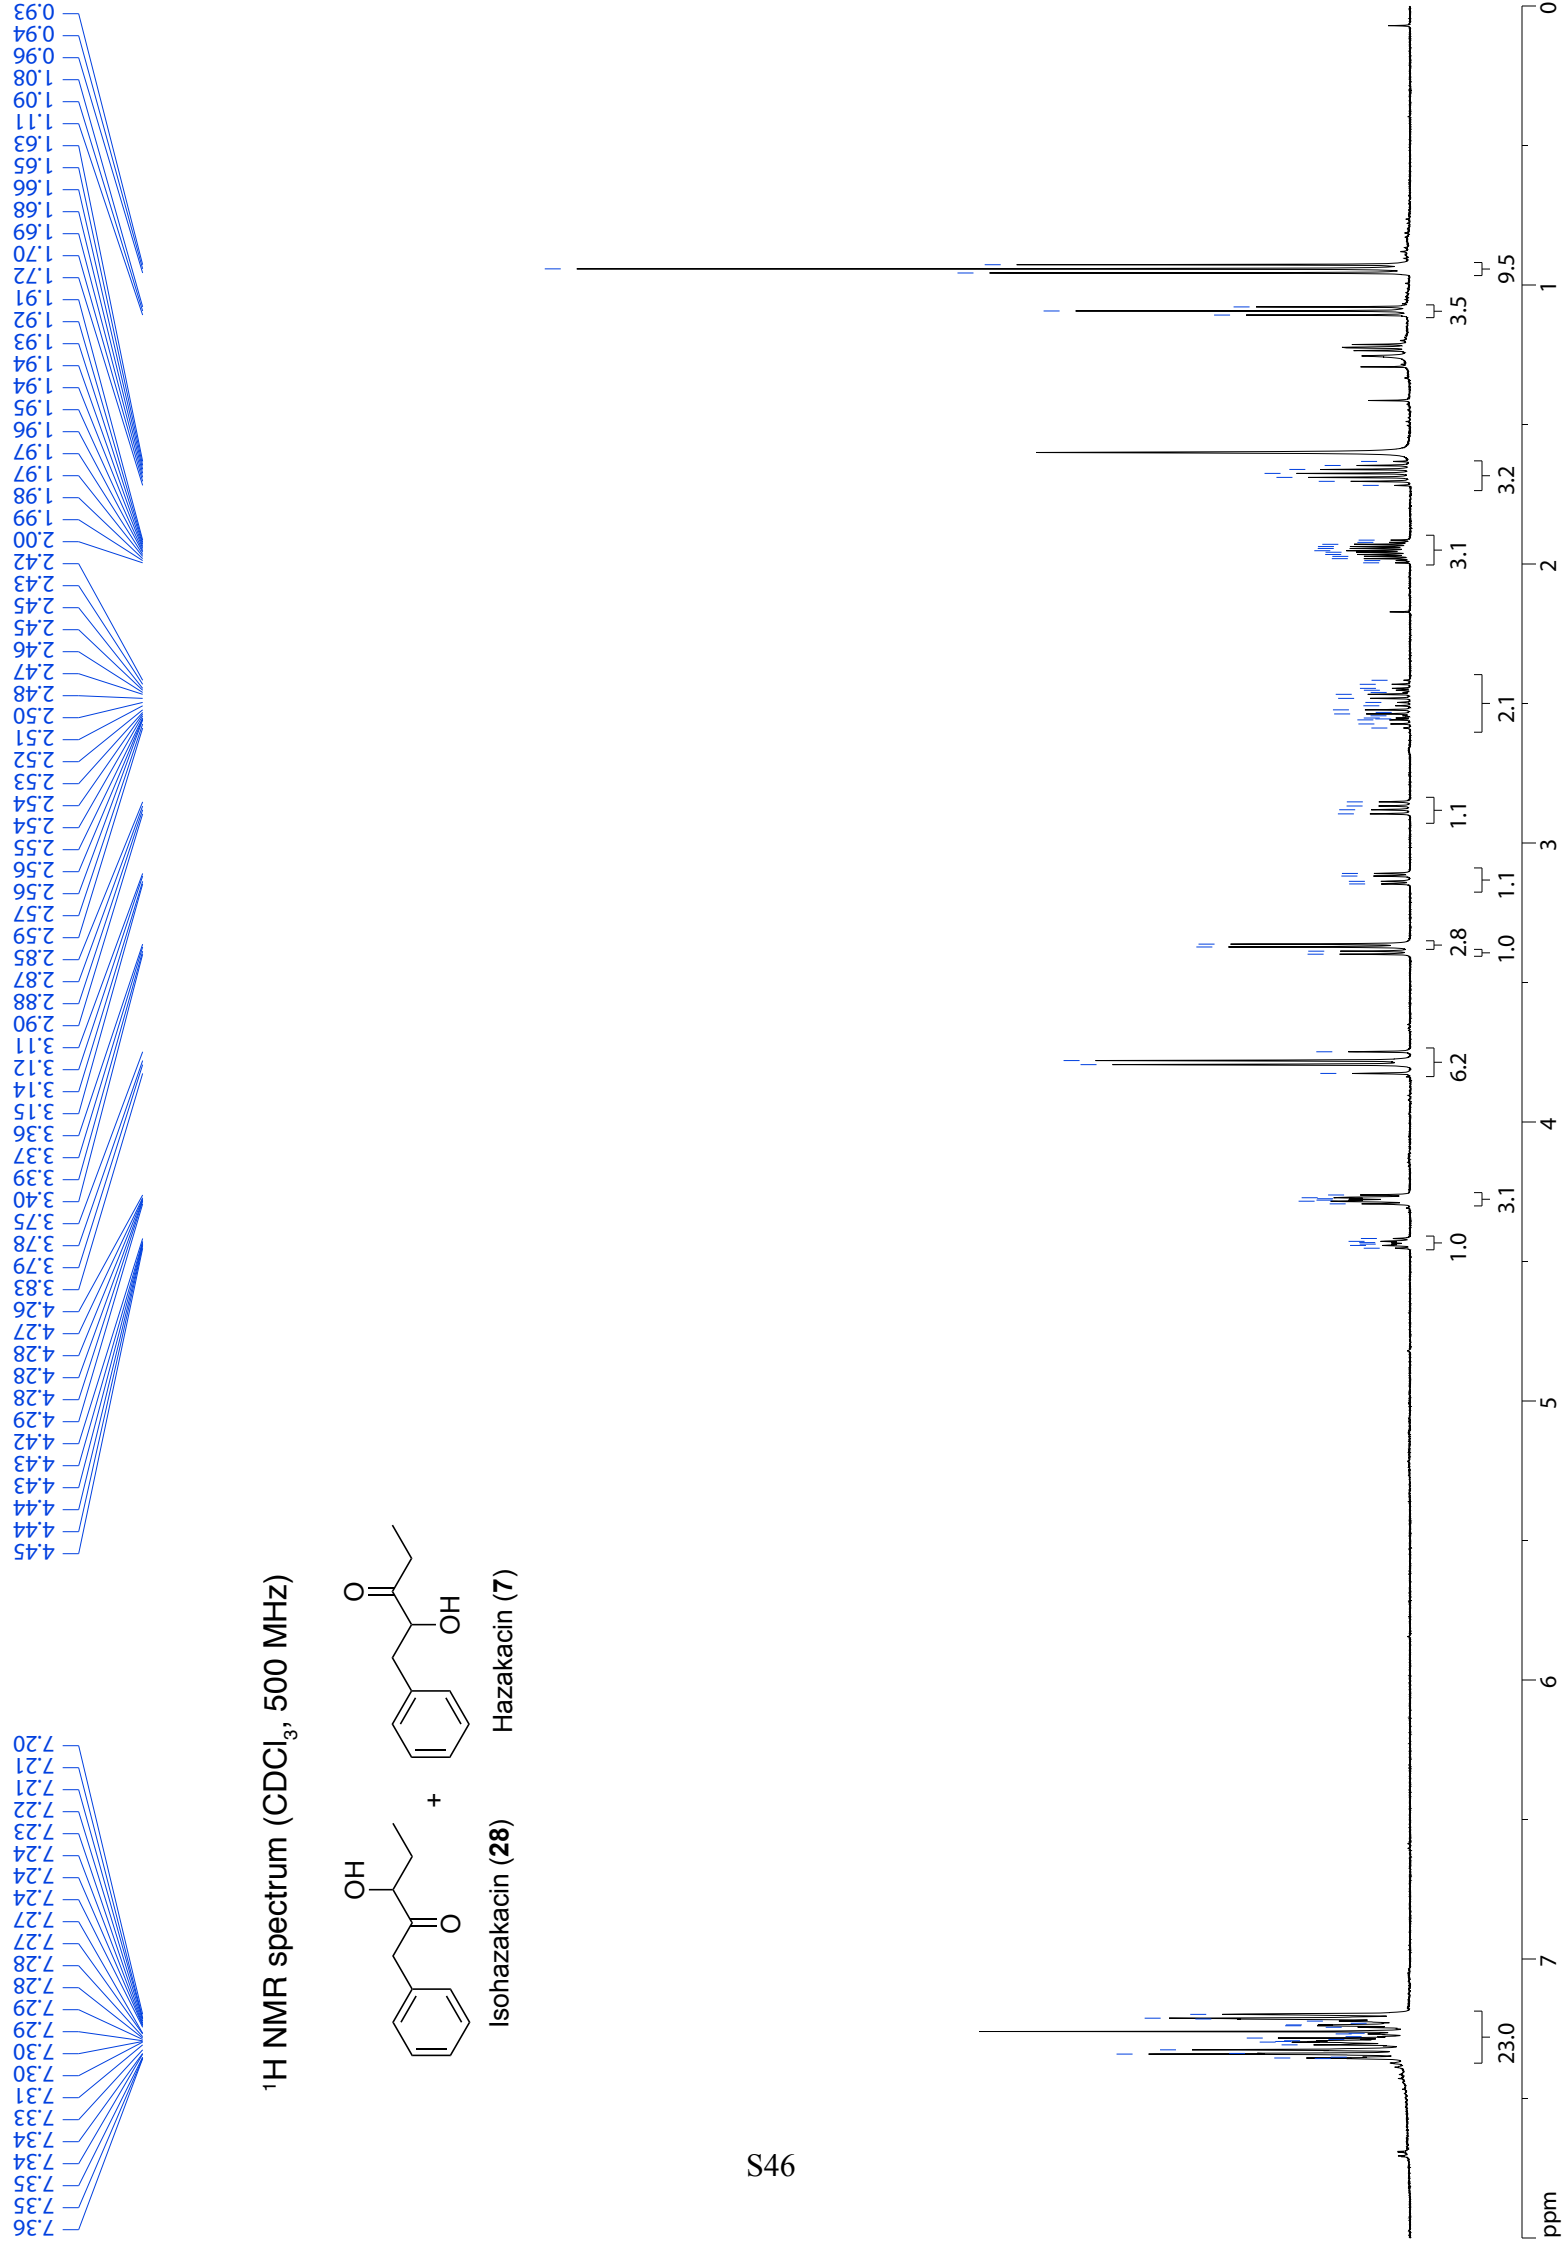

<sup>13</sup>C NMR spectrum (CDCl<sub>3</sub>, 126 MHz)

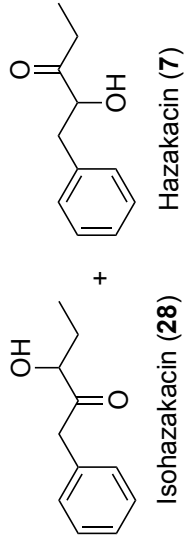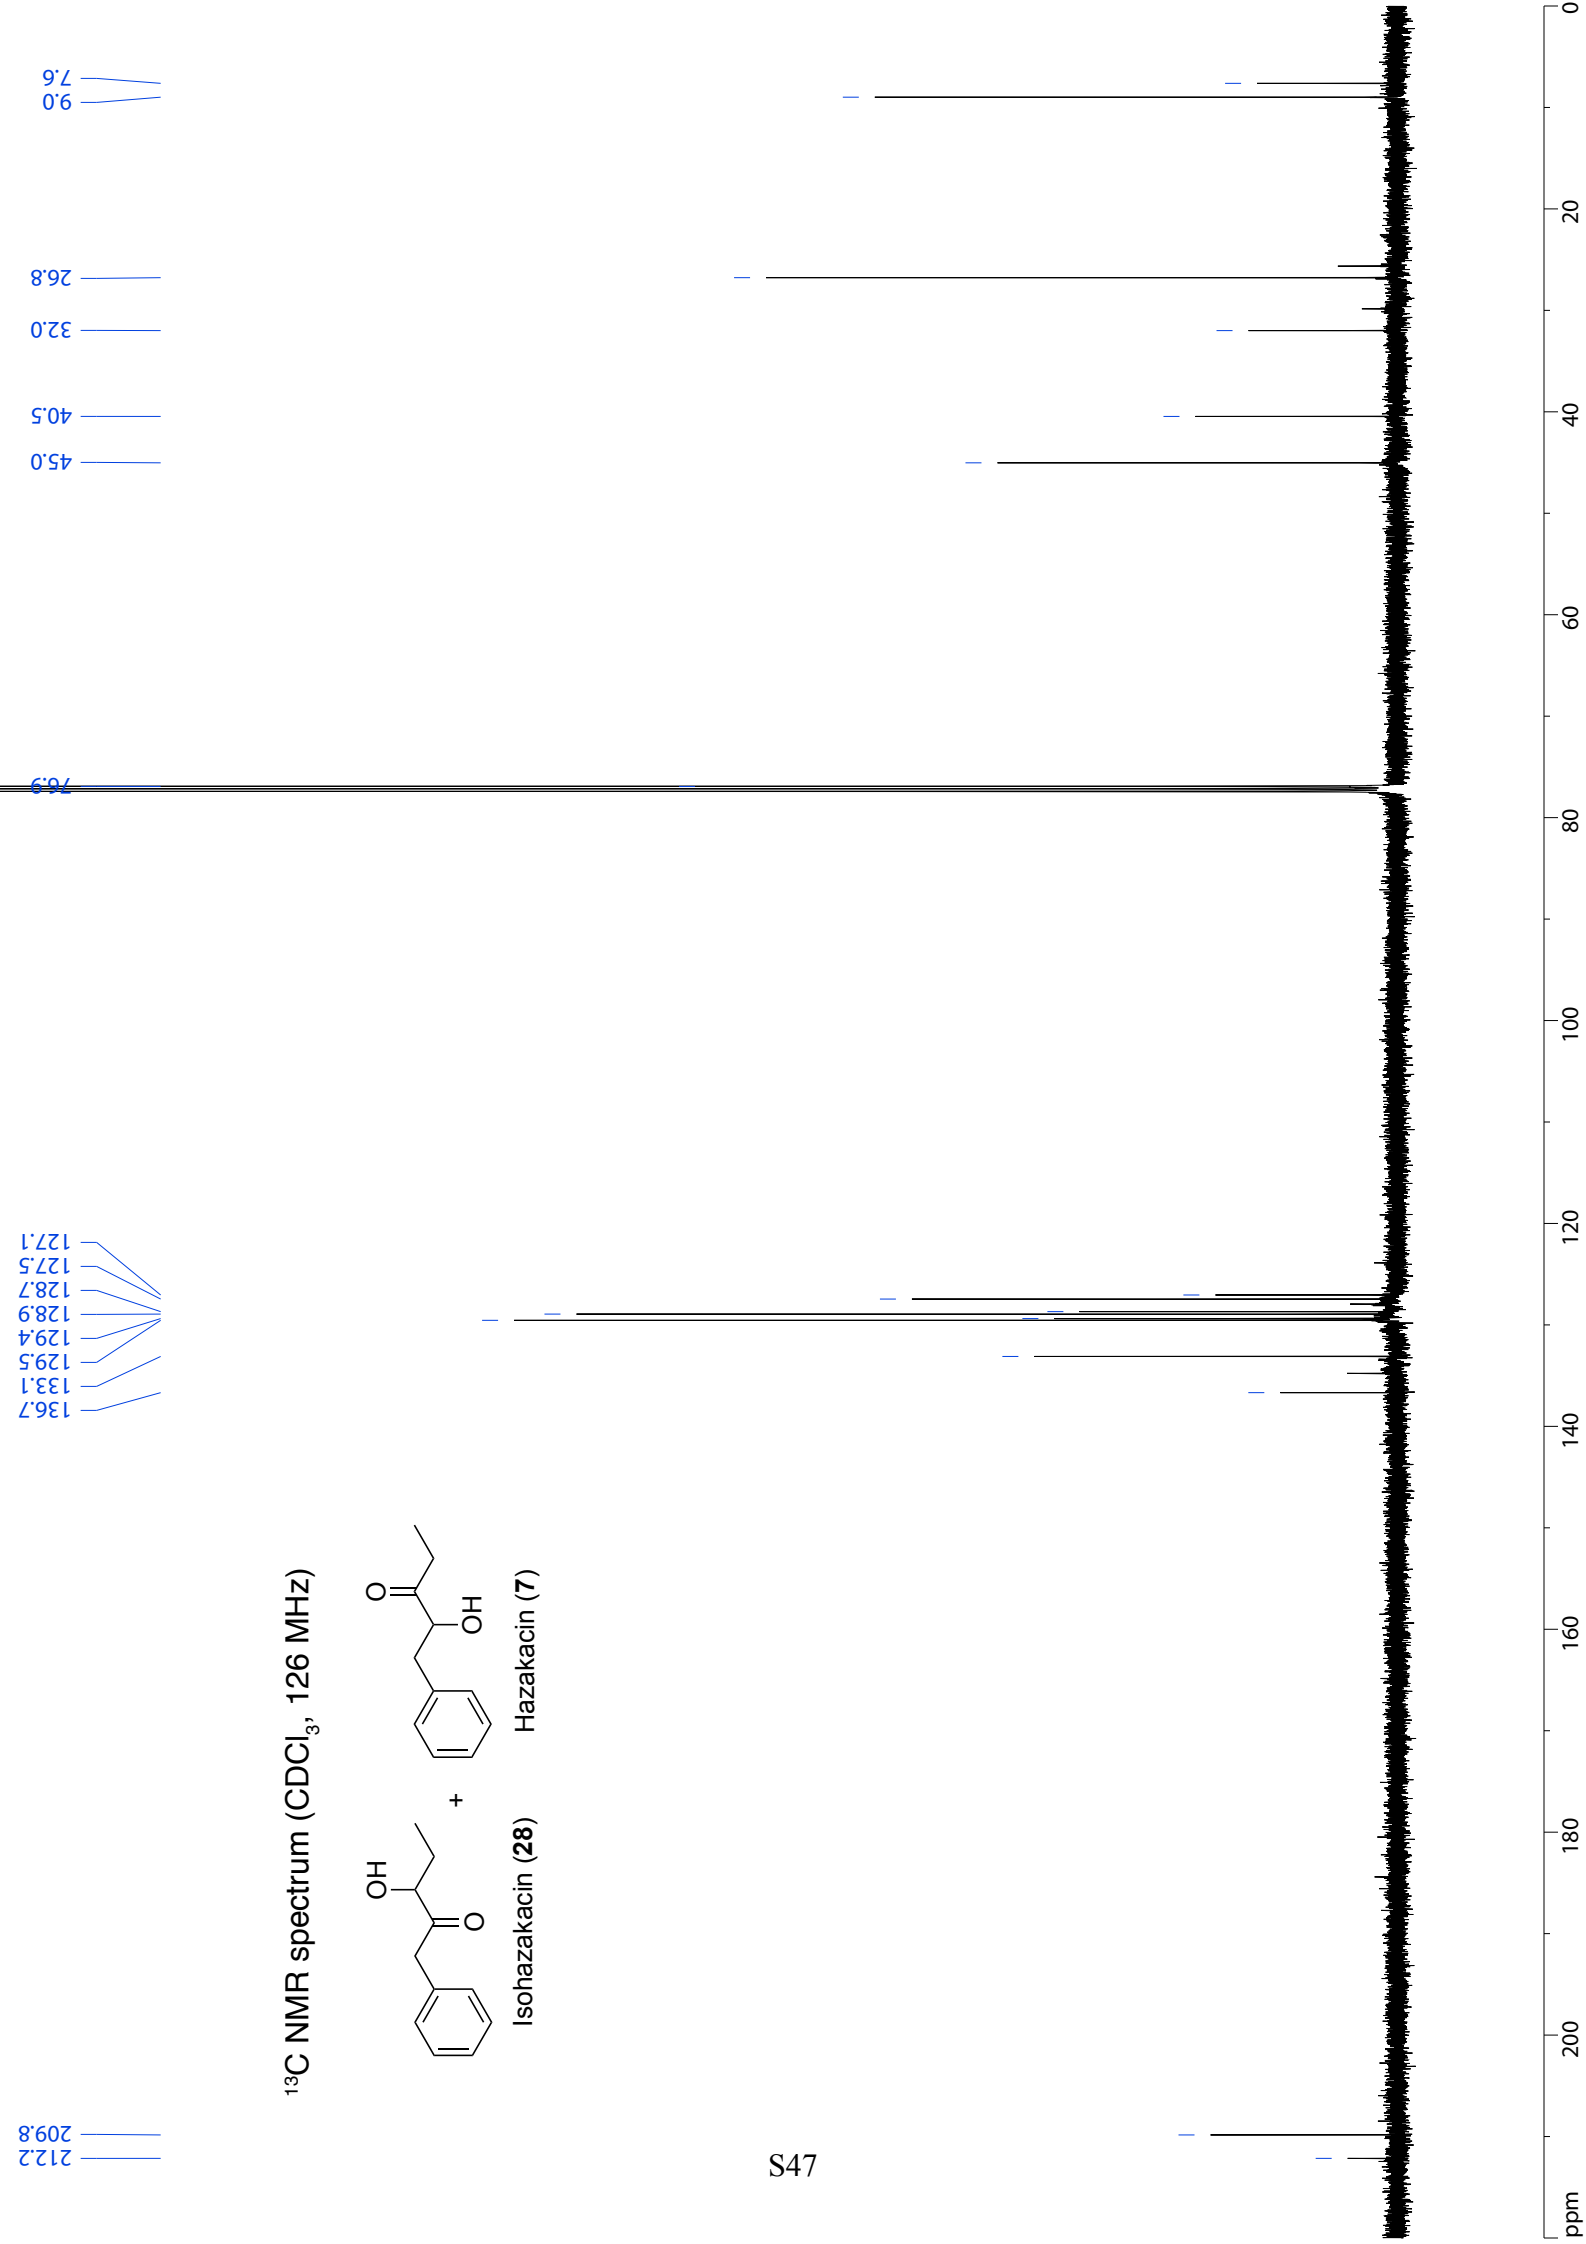

<sup>1</sup>H NMR spectrum (CDCl<sub>3</sub>, 500 MHz)

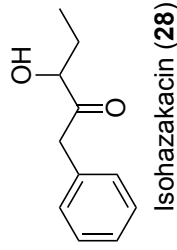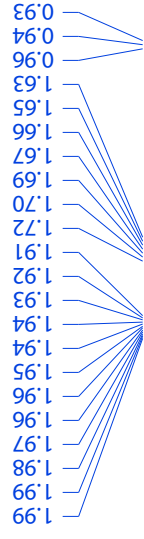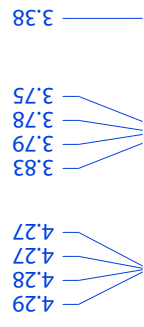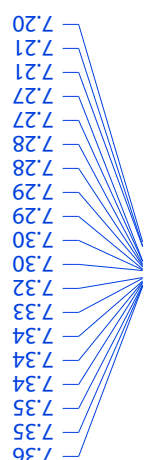

S48

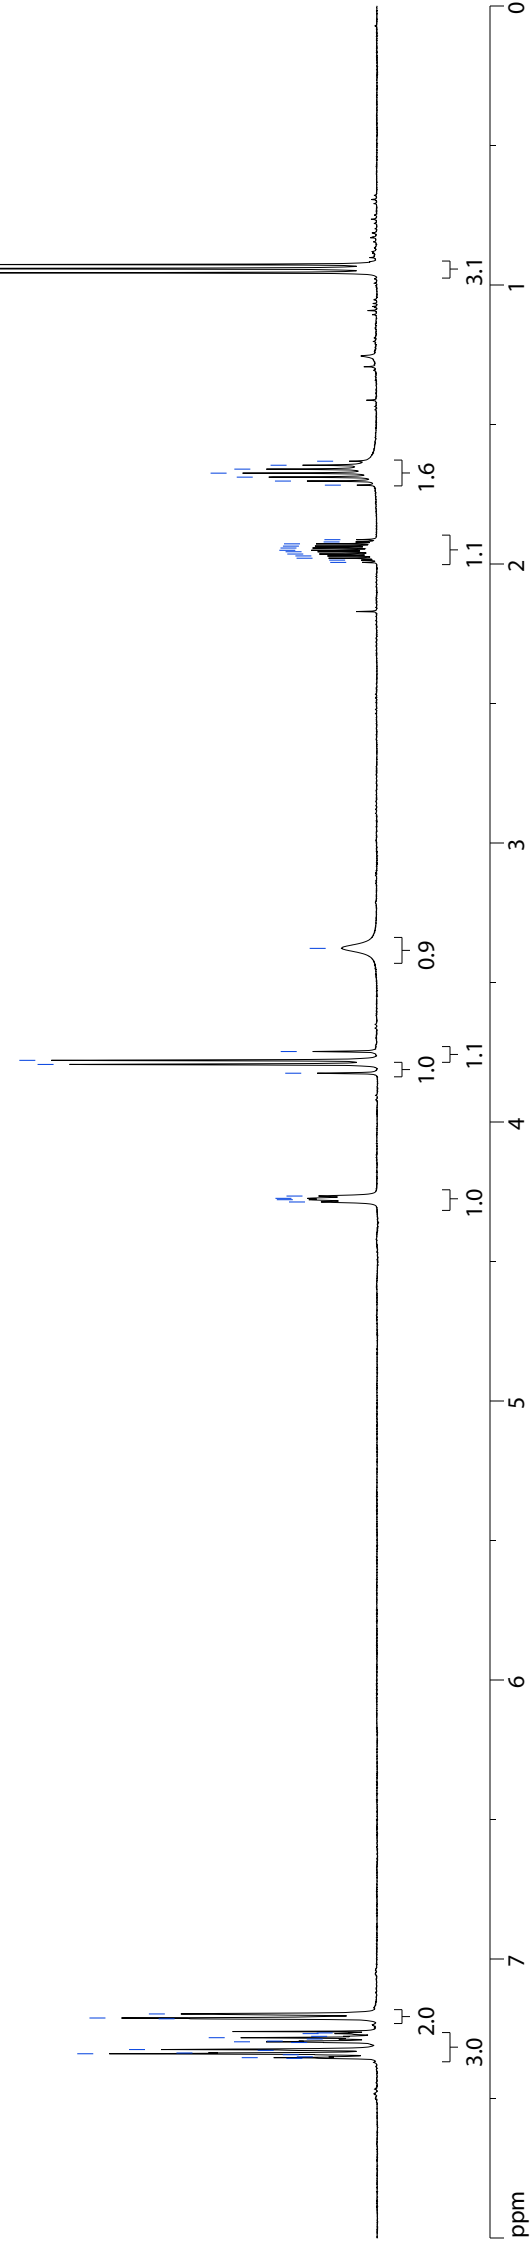



<sup>13</sup>C NMR spectrum (CDCl<sub>3</sub>, 126 MHz)

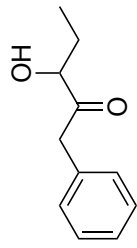

Isohazakacin (**28**)

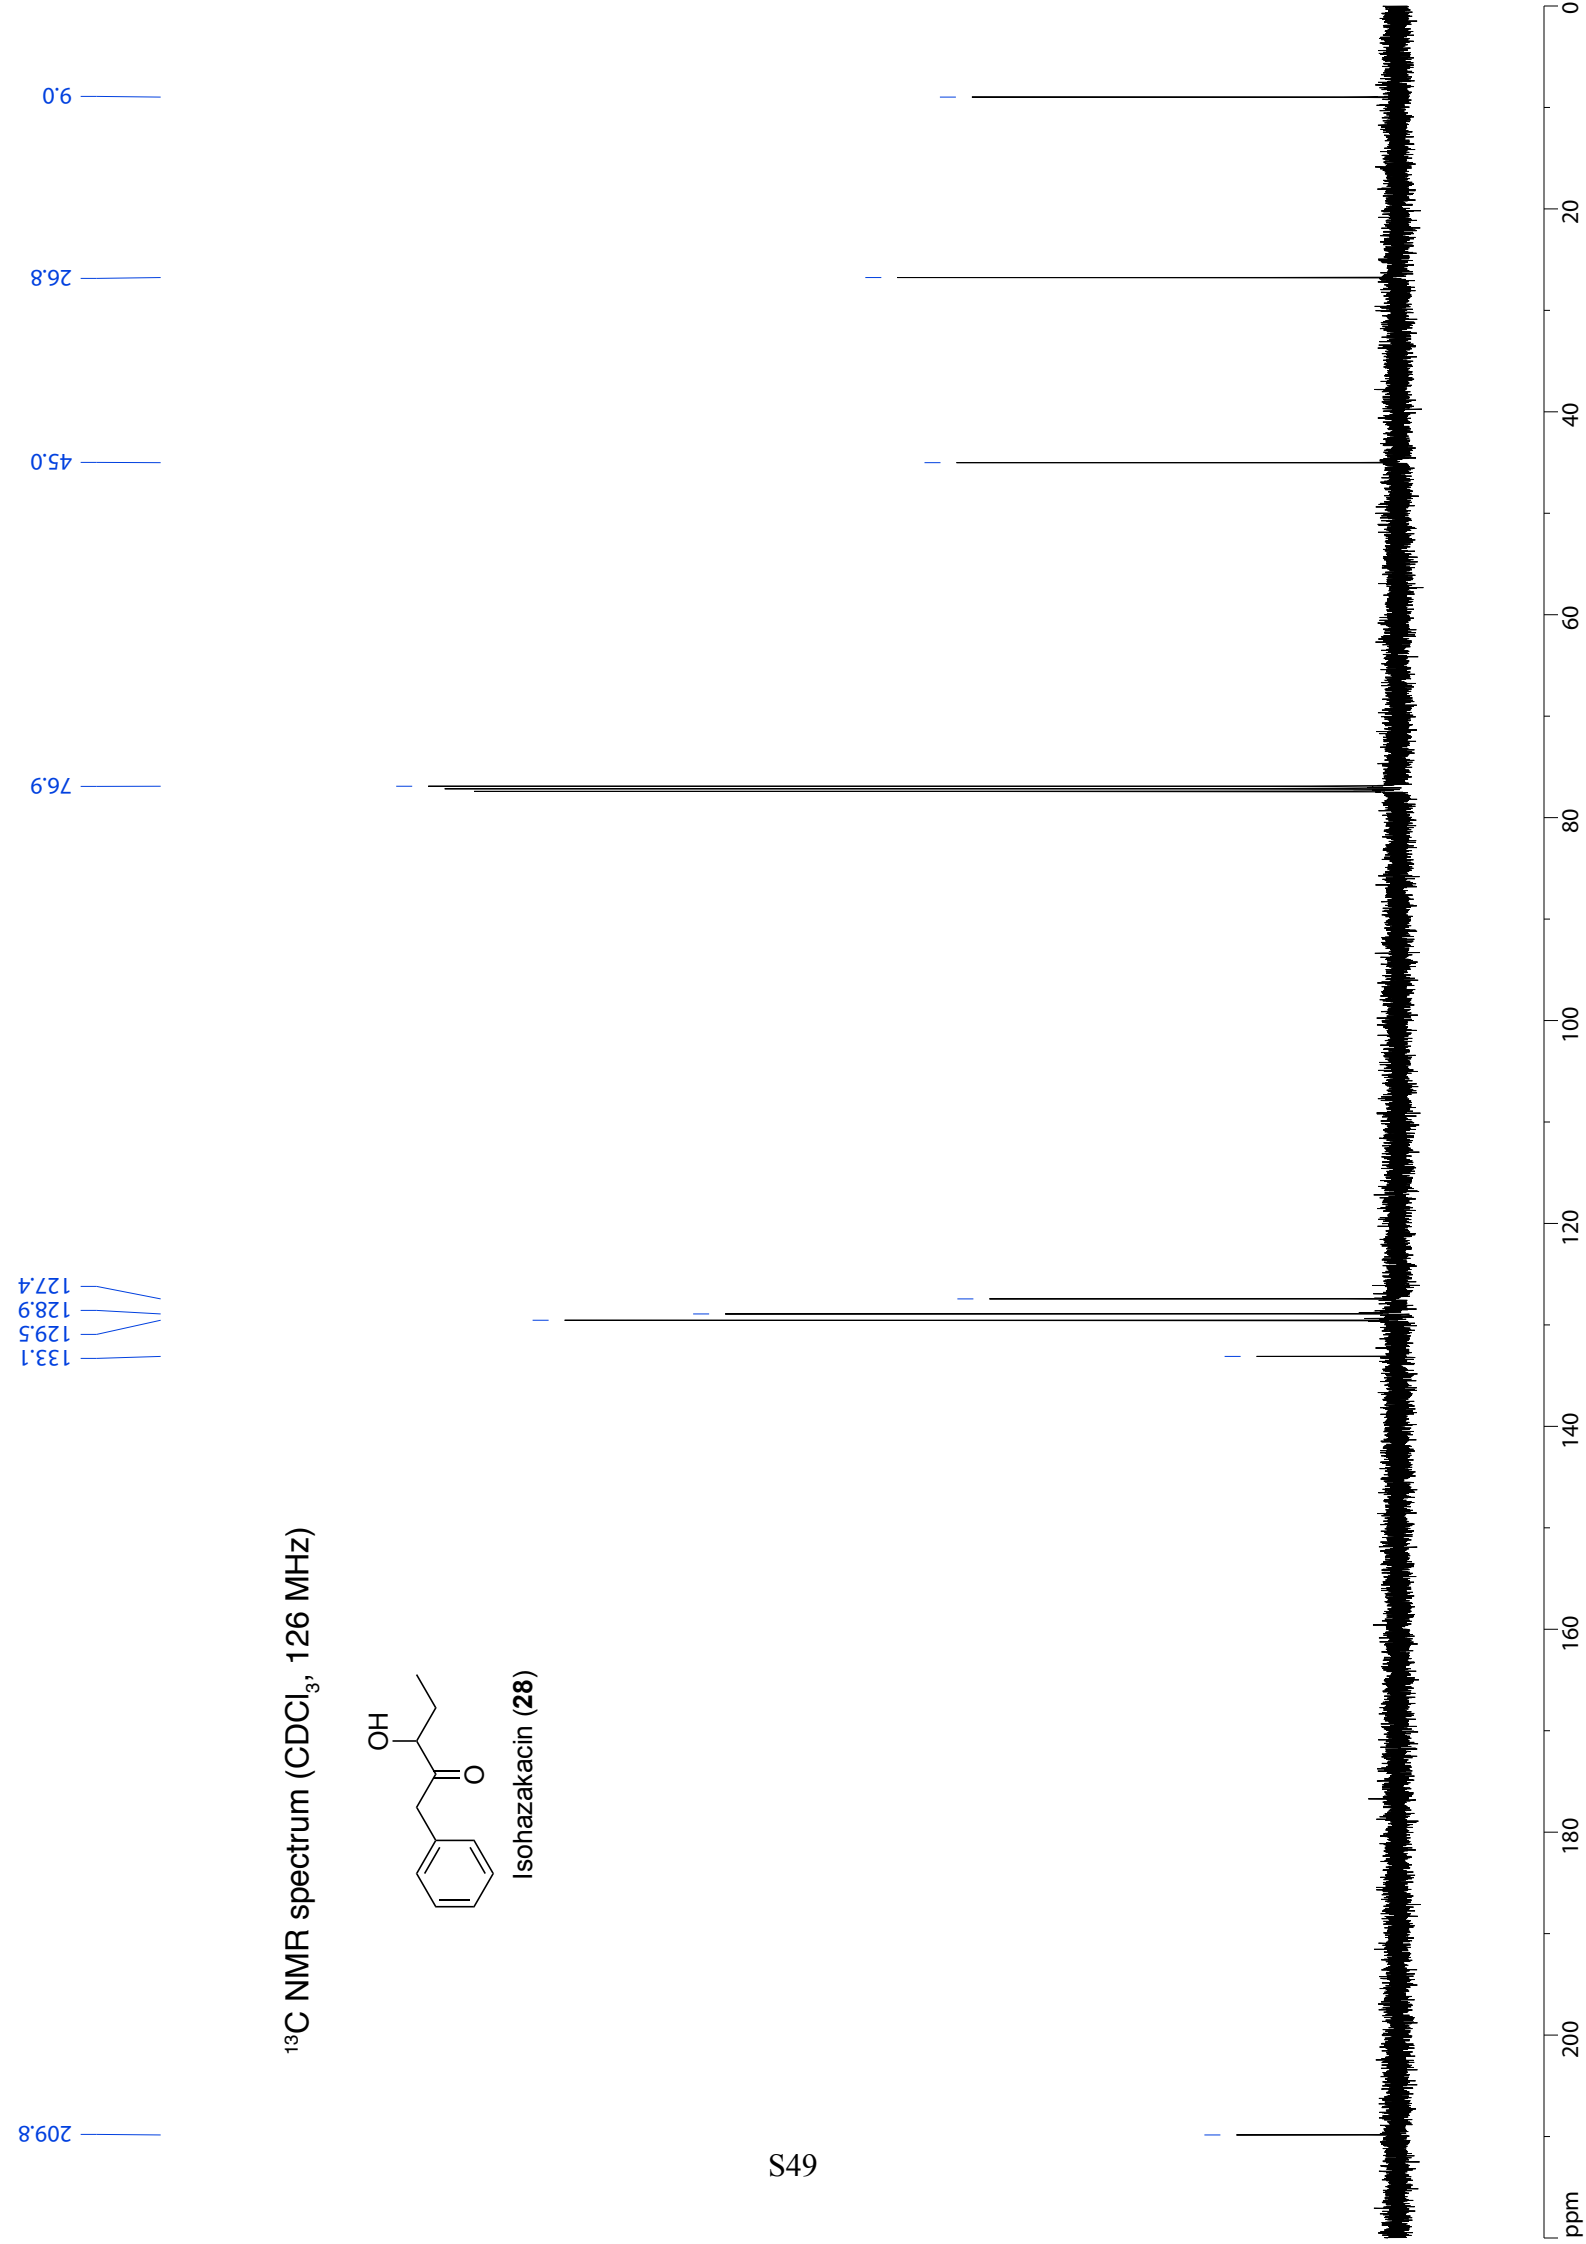

Supplement: d2ob00651k1.pdf [file d2ob00651k1.pdf]
